# Supplementary material
Source: PubMed Central journal article supplement (PMC8916832)
Supplement: mmc1.pdf [file mmc1.pdf]

| seq_id                        | gisaid_epi_isl | originating_lab              | submitting_lab         | authors                | url                                                                                                                                             |
|-------------------------------|----------------|------------------------------|------------------------|------------------------|-------------------------------------------------------------------------------------------------------------------------------------------------|
| Netherlands/DR-EMC-10/2020    | EPI_ISL_523121 | Dutch COVID-19 response team | Erasmus Medical Center | Bas Oude Munnink et al | <a href="https://www.epicov.org/acknowledgement/31/21/EPI_ISL_523121.json">https://www.epicov.org/acknowledgement/31/21/EPI_ISL_523121.json</a> |
| Netherlands/DR-EMC-11/2020    | EPI_ISL_574779 | Dutch COVID-19 response team | Erasmus Medical Center | Bas Oude Munnink et al | <a href="https://www.epicov.org/acknowledgement/47/79/EPI_ISL_574779.json">https://www.epicov.org/acknowledgement/47/79/EPI_ISL_574779.json</a> |
| Netherlands/DR-EMC-12/2020    | EPI_ISL_574780 | Dutch COVID-19 response team | Erasmus Medical Center | Bas Oude Munnink et al | <a href="https://www.epicov.org/acknowledgement/47/80/EPI_ISL_574780.json">https://www.epicov.org/acknowledgement/47/80/EPI_ISL_574780.json</a> |
| Netherlands/DR-EMC-13/2020    | EPI_ISL_574781 | Dutch COVID-19 response team | Erasmus Medical Center | Bas Oude Munnink et al | <a href="https://www.epicov.org/acknowledgement/47/81/EPI_ISL_574781.json">https://www.epicov.org/acknowledgement/47/81/EPI_ISL_574781.json</a> |
| Netherlands/DR-EMC-52/2020    | EPI_ISL_722440 | Dutch COVID-19 response team | Erasmus Medical Center | Bas Oude Munnink et al | <a href="https://www.epicov.org/acknowledgement/24/40/EPI_ISL_722440.json">https://www.epicov.org/acknowledgement/24/40/EPI_ISL_722440.json</a> |
| Netherlands/DR-EMC-7/2020     | EPI_ISL_523125 | Dutch COVID-19 response team | Erasmus Medical Center | Bas Oude Munnink et al | <a href="https://www.epicov.org/acknowledgement/31/25/EPI_ISL_523125.json">https://www.epicov.org/acknowledgement/31/25/EPI_ISL_523125.json</a> |
| Netherlands/FL-EMC-20/2020    | EPI_ISL_523129 | Dutch COVID-19 response team | Erasmus Medical Center | Bas Oude Munnink et al | <a href="https://www.epicov.org/acknowledgement/31/29/EPI_ISL_523129.json">https://www.epicov.org/acknowledgement/31/29/EPI_ISL_523129.json</a> |
| Netherlands/FL-EMC-22/2020    | EPI_ISL_523131 | Dutch COVID-19 response team | Erasmus Medical Center | Bas Oude Munnink et al | <a href="https://www.epicov.org/acknowledgement/31/31/EPI_ISL_523131.json">https://www.epicov.org/acknowledgement/31/31/EPI_ISL_523131.json</a> |
| Netherlands/FL-EMC-23/2020    | EPI_ISL_523132 | Dutch COVID-19 response team | Erasmus Medical Center | Bas Oude Munnink et al | <a href="https://www.epicov.org/acknowledgement/31/32/EPI_ISL_523132.json">https://www.epicov.org/acknowledgement/31/32/EPI_ISL_523132.json</a> |
| Netherlands/FL-EMC-32/2020    | EPI_ISL_632725 | Dutch COVID-19 response team | Erasmus Medical Center | Bas Oude Munnink et al | <a href="https://www.epicov.org/acknowledgement/27/25/EPI_ISL_632725.json">https://www.epicov.org/acknowledgement/27/25/EPI_ISL_632725.json</a> |
| Netherlands/FL-EMC-33/2020    | EPI_ISL_632728 | Dutch COVID-19 response team | Erasmus Medical Center | Bas Oude Munnink et al | <a href="https://www.epicov.org/acknowledgement/27/28/EPI_ISL_632728.json">https://www.epicov.org/acknowledgement/27/28/EPI_ISL_632728.json</a> |
| Netherlands/FL-EMC-34/2020    | EPI_ISL_632729 | Dutch COVID-19 response team | Erasmus Medical Center | Bas Oude Munnink et al | <a href="https://www.epicov.org/acknowledgement/27/29/EPI_ISL_632729.json">https://www.epicov.org/acknowledgement/27/29/EPI_ISL_632729.json</a> |
| Netherlands/FL-EMC-35/2020    | EPI_ISL_632445 | Dutch COVID-19 response team | Erasmus Medical Center | Bas Oude Munnink et al | <a href="https://www.epicov.org/acknowledgement/24/45/EPI_ISL_632445.json">https://www.epicov.org/acknowledgement/24/45/EPI_ISL_632445.json</a> |
| Netherlands/FL-EMC-37/2020    | EPI_ISL_632744 | Dutch COVID-19 response team | Erasmus Medical Center | Bas Oude Munnink et al | <a href="https://www.epicov.org/acknowledgement/27/44/EPI_ISL_632744.json">https://www.epicov.org/acknowledgement/27/44/EPI_ISL_632744.json</a> |
| Netherlands/FL-EMC-38/2020    | EPI_ISL_632778 | Dutch COVID-19 response team | Erasmus Medical Center | Bas Oude Munnink et al | <a href="https://www.epicov.org/acknowledgement/27/78/EPI_ISL_632778.json">https://www.epicov.org/acknowledgement/27/78/EPI_ISL_632778.json</a> |
| Netherlands/Flevoland_16/2020 | EPI_ISL_460839 | Dutch COVID-19 response team | Erasmus Medical Center | Bas Oude Munnink et al | <a href="https://www.epicov.org/acknowledgement/08/39/EPI_ISL_460839.json">https://www.epicov.org/acknowledgement/08/39/EPI_ISL_460839.json</a> |
| Netherlands/Flevoland_18/2020 | EPI_ISL_460841 | Dutch COVID-19 response team | Erasmus Medical Center | Bas Oude Munnink et al | <a href="https://www.epicov.org/acknowledgement/08/41/EPI_ISL_460841.json">https://www.epicov.org/acknowledgement/08/41/EPI_ISL_460841.json</a> |
| Netherlands/FR-EMC-46/2020    | EPI_ISL_523138 | Dutch COVID-19 response team | Erasmus Medical Center | Bas Oude Munnink et al | <a href="https://www.epicov.org/acknowledgement/31/38/EPI_ISL_523138.json">https://www.epicov.org/acknowledgement/31/38/EPI_ISL_523138.json</a> |
| Netherlands/FR-EMC-47/2020    | EPI_ISL_523139 | Dutch COVID-19 response team | Erasmus Medical Center | Bas Oude Munnink et al | <a href="https://www.epicov.org/acknowledgement/31/39/EPI_ISL_523139.json">https://www.epicov.org/acknowledgement/31/39/EPI_ISL_523139.json</a> |
| Netherlands/FR-EMC-48/2020    | EPI_ISL_523140 | Dutch COVID-19 response team | Erasmus Medical Center | Bas Oude Munnink et al | <a href="https://www.epicov.org/acknowledgement/31/40/EPI_ISL_523140.json">https://www.epicov.org/acknowledgement/31/40/EPI_ISL_523140.json</a> |
| Netherlands/Friesland_41/2020 | EPI_ISL_460856 | Dutch COVID-19 response team | Erasmus Medical Center | Bas Oude Munnink et al | <a href="https://www.epicov.org/acknowledgement/08/56/EPI_ISL_460856.json">https://www.epicov.org/acknowledgement/08/56/EPI_ISL_460856.json</a> |
| Netherlands/Friesland_43/2020 | EPI_ISL_460858 | Dutch COVID-19 response team | Erasmus Medical Center | Bas Oude Munnink et al | <a href="https://www.epicov.org/acknowledgement/08/58/EPI_ISL_460858.json">https://www.epicov.org/acknowledgement/08/58/EPI_ISL_460858.json</a> |
| Netherlands/GE-EMC-165/2020   | EPI_ISL_523148 | Dutch COVID-19 response team | Erasmus Medical Center | Bas Oude Munnink et al | <a href="https://www.epicov.org/acknowledgement/31/48/EPI_ISL_523148.json">https://www.epicov.org/acknowledgement/31/48/EPI_ISL_523148.json</a> |
| Netherlands/GE-EMC-167/2020   | EPI_ISL_523150 | Dutch COVID-19 response team | Erasmus Medical Center | Bas Oude Munnink et al | <a href="https://www.epicov.org/acknowledgement/31/50/EPI_ISL_523150.json">https://www.epicov.org/acknowledgement/31/50/EPI_ISL_523150.json</a> |
| Netherlands/GE-EMC-182/2020   | EPI_ISL_523164 | Dutch COVID-19 response team | Erasmus Medical Center | Bas Oude Munnink et al | <a href="https://www.epicov.org/acknowledgement/31/64/EPI_ISL_523164.json">https://www.epicov.org/acknowledgement/31/64/EPI_ISL_523164.json</a> |

| seq_id                      | gisaid_epi_isl | originating_lab              | submitting_lab         | authors                | url                                                                                                                                             |
|-----------------------------|----------------|------------------------------|------------------------|------------------------|-------------------------------------------------------------------------------------------------------------------------------------------------|
| Netherlands/GE-EMC-183/2020 | EPI_ISL_523165 | Dutch COVID-19 response team | Erasmus Medical Center | Bas Oude Munnink et al | <a href="https://www.epicov.org/acknowledgement/31/65/EPI_ISL_523165.json">https://www.epicov.org/acknowledgement/31/65/EPI_ISL_523165.json</a> |
| Netherlands/GE-EMC-184/2020 | EPI_ISL_523166 | Dutch COVID-19 response team | Erasmus Medical Center | Bas Oude Munnink et al | <a href="https://www.epicov.org/acknowledgement/31/66/EPI_ISL_523166.json">https://www.epicov.org/acknowledgement/31/66/EPI_ISL_523166.json</a> |
| Netherlands/GE-EMC-187/2020 | EPI_ISL_523169 | Dutch COVID-19 response team | Erasmus Medical Center | Bas Oude Munnink et al | <a href="https://www.epicov.org/acknowledgement/31/69/EPI_ISL_523169.json">https://www.epicov.org/acknowledgement/31/69/EPI_ISL_523169.json</a> |
| Netherlands/GE-EMC-195/2020 | EPI_ISL_523177 | Dutch COVID-19 response team | Erasmus Medical Center | Bas Oude Munnink et al | <a href="https://www.epicov.org/acknowledgement/31/77/EPI_ISL_523177.json">https://www.epicov.org/acknowledgement/31/77/EPI_ISL_523177.json</a> |
| Netherlands/GE-EMC-196/2020 | EPI_ISL_523178 | Dutch COVID-19 response team | Erasmus Medical Center | Bas Oude Munnink et al | <a href="https://www.epicov.org/acknowledgement/31/78/EPI_ISL_523178.json">https://www.epicov.org/acknowledgement/31/78/EPI_ISL_523178.json</a> |
| Netherlands/GE-EMC-197/2020 | EPI_ISL_523179 | Dutch COVID-19 response team | Erasmus Medical Center | Bas Oude Munnink et al | <a href="https://www.epicov.org/acknowledgement/31/79/EPI_ISL_523179.json">https://www.epicov.org/acknowledgement/31/79/EPI_ISL_523179.json</a> |
| Netherlands/GE-EMC-198/2020 | EPI_ISL_523180 | Dutch COVID-19 response team | Erasmus Medical Center | Bas Oude Munnink et al | <a href="https://www.epicov.org/acknowledgement/31/80/EPI_ISL_523180.json">https://www.epicov.org/acknowledgement/31/80/EPI_ISL_523180.json</a> |
| Netherlands/GE-EMC-201/2020 | EPI_ISL_523183 | Dutch COVID-19 response team | Erasmus Medical Center | Bas Oude Munnink et al | <a href="https://www.epicov.org/acknowledgement/31/83/EPI_ISL_523183.json">https://www.epicov.org/acknowledgement/31/83/EPI_ISL_523183.json</a> |
| Netherlands/GE-EMC-202/2020 | EPI_ISL_523184 | Dutch COVID-19 response team | Erasmus Medical Center | Bas Oude Munnink et al | <a href="https://www.epicov.org/acknowledgement/31/84/EPI_ISL_523184.json">https://www.epicov.org/acknowledgement/31/84/EPI_ISL_523184.json</a> |
| Netherlands/GE-EMC-204/2020 | EPI_ISL_523186 | Dutch COVID-19 response team | Erasmus Medical Center | Bas Oude Munnink et al | <a href="https://www.epicov.org/acknowledgement/31/86/EPI_ISL_523186.json">https://www.epicov.org/acknowledgement/31/86/EPI_ISL_523186.json</a> |
| Netherlands/GE-EMC-205/2020 | EPI_ISL_523187 | Dutch COVID-19 response team | Erasmus Medical Center | Bas Oude Munnink et al | <a href="https://www.epicov.org/acknowledgement/31/87/EPI_ISL_523187.json">https://www.epicov.org/acknowledgement/31/87/EPI_ISL_523187.json</a> |
| Netherlands/GE-EMC-207/2020 | EPI_ISL_523189 | Dutch COVID-19 response team | Erasmus Medical Center | Bas Oude Munnink et al | <a href="https://www.epicov.org/acknowledgement/31/89/EPI_ISL_523189.json">https://www.epicov.org/acknowledgement/31/89/EPI_ISL_523189.json</a> |
| Netherlands/GE-EMC-211/2020 | EPI_ISL_523193 | Dutch COVID-19 response team | Erasmus Medical Center | Bas Oude Munnink et al | <a href="https://www.epicov.org/acknowledgement/31/93/EPI_ISL_523193.json">https://www.epicov.org/acknowledgement/31/93/EPI_ISL_523193.json</a> |
| Netherlands/GE-EMC-212/2020 | EPI_ISL_523194 | Dutch COVID-19 response team | Erasmus Medical Center | Bas Oude Munnink et al | <a href="https://www.epicov.org/acknowledgement/31/94/EPI_ISL_523194.json">https://www.epicov.org/acknowledgement/31/94/EPI_ISL_523194.json</a> |
| Netherlands/GE-EMC-218/2020 | EPI_ISL_523200 | Dutch COVID-19 response team | Erasmus Medical Center | Bas Oude Munnink et al | <a href="https://www.epicov.org/acknowledgement/32/00/EPI_ISL_523200.json">https://www.epicov.org/acknowledgement/32/00/EPI_ISL_523200.json</a> |
| Netherlands/GE-EMC-221/2020 | EPI_ISL_523203 | Dutch COVID-19 response team | Erasmus Medical Center | Bas Oude Munnink et al | <a href="https://www.epicov.org/acknowledgement/32/03/EPI_ISL_523203.json">https://www.epicov.org/acknowledgement/32/03/EPI_ISL_523203.json</a> |
| Netherlands/GE-EMC-222/2020 | EPI_ISL_523204 | Dutch COVID-19 response team | Erasmus Medical Center | Bas Oude Munnink et al | <a href="https://www.epicov.org/acknowledgement/32/04/EPI_ISL_523204.json">https://www.epicov.org/acknowledgement/32/04/EPI_ISL_523204.json</a> |
| Netherlands/GE-EMC-231/2020 | EPI_ISL_523211 | Dutch COVID-19 response team | Erasmus Medical Center | Bas Oude Munnink et al | <a href="https://www.epicov.org/acknowledgement/32/11/EPI_ISL_523211.json">https://www.epicov.org/acknowledgement/32/11/EPI_ISL_523211.json</a> |
| Netherlands/GE-EMC-262/2020 | EPI_ISL_523241 | Dutch COVID-19 response team | Erasmus Medical Center | Bas Oude Munnink et al | <a href="https://www.epicov.org/acknowledgement/32/41/EPI_ISL_523241.json">https://www.epicov.org/acknowledgement/32/41/EPI_ISL_523241.json</a> |
| Netherlands/GE-EMC-264/2020 | EPI_ISL_523243 | Dutch COVID-19 response team | Erasmus Medical Center | Bas Oude Munnink et al | <a href="https://www.epicov.org/acknowledgement/32/43/EPI_ISL_523243.json">https://www.epicov.org/acknowledgement/32/43/EPI_ISL_523243.json</a> |
| Netherlands/GE-EMC-265/2020 | EPI_ISL_523244 | Dutch COVID-19 response team | Erasmus Medical Center | Bas Oude Munnink et al | <a href="https://www.epicov.org/acknowledgement/32/44/EPI_ISL_523244.json">https://www.epicov.org/acknowledgement/32/44/EPI_ISL_523244.json</a> |
| Netherlands/GE-EMC-270/2020 | EPI_ISL_523249 | Dutch COVID-19 response team | Erasmus Medical Center | Bas Oude Munnink et al | <a href="https://www.epicov.org/acknowledgement/32/49/EPI_ISL_523249.json">https://www.epicov.org/acknowledgement/32/49/EPI_ISL_523249.json</a> |
| Netherlands/GE-EMC-272/2020 | EPI_ISL_523251 | Dutch COVID-19 response team | Erasmus Medical Center | Bas Oude Munnink et al | <a href="https://www.epicov.org/acknowledgement/32/51/EPI_ISL_523251.json">https://www.epicov.org/acknowledgement/32/51/EPI_ISL_523251.json</a> |
| Netherlands/GE-EMC-274/2020 | EPI_ISL_523253 | Dutch COVID-19 response team | Erasmus Medical Center | Bas Oude Munnink et al | <a href="https://www.epicov.org/acknowledgement/32/53/EPI_ISL_523253.json">https://www.epicov.org/acknowledgement/32/53/EPI_ISL_523253.json</a> |
| Netherlands/GE-EMC-278/2020 | EPI_ISL_523257 | Dutch COVID-19 response team | Erasmus Medical Center | Bas Oude Munnink et al | <a href="https://www.epicov.org/acknowledgement/32/57/EPI_ISL_523257.json">https://www.epicov.org/acknowledgement/32/57/EPI_ISL_523257.json</a> |

| seq_id                      | gisaid_epi_isl | originating_lab              | submitting_lab         | authors                | url                                                                                                                                             |
|-----------------------------|----------------|------------------------------|------------------------|------------------------|-------------------------------------------------------------------------------------------------------------------------------------------------|
| Netherlands/GE-EMC-279/2020 | EPI_ISL_523258 | Dutch COVID-19 response team | Erasmus Medical Center | Bas Oude Munnink et al | <a href="https://www.epicov.org/acknowledgement/32/58/EPI_ISL_523258.json">https://www.epicov.org/acknowledgement/32/58/EPI_ISL_523258.json</a> |
| Netherlands/GE-EMC-282/2020 | EPI_ISL_523261 | Dutch COVID-19 response team | Erasmus Medical Center | Bas Oude Munnink et al | <a href="https://www.epicov.org/acknowledgement/32/61/EPI_ISL_523261.json">https://www.epicov.org/acknowledgement/32/61/EPI_ISL_523261.json</a> |
| Netherlands/GE-EMC-284/2020 | EPI_ISL_523263 | Dutch COVID-19 response team | Erasmus Medical Center | Bas Oude Munnink et al | <a href="https://www.epicov.org/acknowledgement/32/63/EPI_ISL_523263.json">https://www.epicov.org/acknowledgement/32/63/EPI_ISL_523263.json</a> |
| Netherlands/GE-EMC-285/2020 | EPI_ISL_523264 | Dutch COVID-19 response team | Erasmus Medical Center | Bas Oude Munnink et al | <a href="https://www.epicov.org/acknowledgement/32/64/EPI_ISL_523264.json">https://www.epicov.org/acknowledgement/32/64/EPI_ISL_523264.json</a> |
| Netherlands/GE-EMC-286/2020 | EPI_ISL_523265 | Dutch COVID-19 response team | Erasmus Medical Center | Bas Oude Munnink et al | <a href="https://www.epicov.org/acknowledgement/32/65/EPI_ISL_523265.json">https://www.epicov.org/acknowledgement/32/65/EPI_ISL_523265.json</a> |
| Netherlands/GE-EMC-287/2020 | EPI_ISL_523266 | Dutch COVID-19 response team | Erasmus Medical Center | Bas Oude Munnink et al | <a href="https://www.epicov.org/acknowledgement/32/66/EPI_ISL_523266.json">https://www.epicov.org/acknowledgement/32/66/EPI_ISL_523266.json</a> |
| Netherlands/GE-EMC-288/2020 | EPI_ISL_523267 | Dutch COVID-19 response team | Erasmus Medical Center | Bas Oude Munnink et al | <a href="https://www.epicov.org/acknowledgement/32/67/EPI_ISL_523267.json">https://www.epicov.org/acknowledgement/32/67/EPI_ISL_523267.json</a> |
| Netherlands/GE-EMC-289/2020 | EPI_ISL_523268 | Dutch COVID-19 response team | Erasmus Medical Center | Bas Oude Munnink et al | <a href="https://www.epicov.org/acknowledgement/32/68/EPI_ISL_523268.json">https://www.epicov.org/acknowledgement/32/68/EPI_ISL_523268.json</a> |
| Netherlands/GE-EMC-296/2020 | EPI_ISL_523275 | Dutch COVID-19 response team | Erasmus Medical Center | Bas Oude Munnink et al | <a href="https://www.epicov.org/acknowledgement/32/75/EPI_ISL_523275.json">https://www.epicov.org/acknowledgement/32/75/EPI_ISL_523275.json</a> |
| Netherlands/GE-EMC-304/2020 | EPI_ISL_577831 | Dutch COVID-19 response team | Erasmus Medical Center | Bas Oude Munnink et al | <a href="https://www.epicov.org/acknowledgement/78/31/EPI_ISL_577831.json">https://www.epicov.org/acknowledgement/78/31/EPI_ISL_577831.json</a> |
| Netherlands/GE-EMC-305/2020 | EPI_ISL_577832 | Dutch COVID-19 response team | Erasmus Medical Center | Bas Oude Munnink et al | <a href="https://www.epicov.org/acknowledgement/78/32/EPI_ISL_577832.json">https://www.epicov.org/acknowledgement/78/32/EPI_ISL_577832.json</a> |
| Netherlands/GE-EMC-308/2020 | EPI_ISL_632627 | Dutch COVID-19 response team | Erasmus Medical Center | Bas Oude Munnink et al | <a href="https://www.epicov.org/acknowledgement/26/27/EPI_ISL_632627.json">https://www.epicov.org/acknowledgement/26/27/EPI_ISL_632627.json</a> |
| Netherlands/GE-EMC-312/2020 | EPI_ISL_632636 | Dutch COVID-19 response team | Erasmus Medical Center | Bas Oude Munnink et al | <a href="https://www.epicov.org/acknowledgement/26/36/EPI_ISL_632636.json">https://www.epicov.org/acknowledgement/26/36/EPI_ISL_632636.json</a> |
| Netherlands/GE-EMC-314/2020 | EPI_ISL_632643 | Dutch COVID-19 response team | Erasmus Medical Center | Bas Oude Munnink et al | <a href="https://www.epicov.org/acknowledgement/26/43/EPI_ISL_632643.json">https://www.epicov.org/acknowledgement/26/43/EPI_ISL_632643.json</a> |
| Netherlands/GE-EMC-315/2020 | EPI_ISL_632646 | Dutch COVID-19 response team | Erasmus Medical Center | Bas Oude Munnink et al | <a href="https://www.epicov.org/acknowledgement/26/46/EPI_ISL_632646.json">https://www.epicov.org/acknowledgement/26/46/EPI_ISL_632646.json</a> |
| Netherlands/GE-EMC-316/2020 | EPI_ISL_632647 | Dutch COVID-19 response team | Erasmus Medical Center | Bas Oude Munnink et al | <a href="https://www.epicov.org/acknowledgement/26/47/EPI_ISL_632647.json">https://www.epicov.org/acknowledgement/26/47/EPI_ISL_632647.json</a> |
| Netherlands/GE-EMC-318/2020 | EPI_ISL_632650 | Dutch COVID-19 response team | Erasmus Medical Center | Bas Oude Munnink et al | <a href="https://www.epicov.org/acknowledgement/26/50/EPI_ISL_632650.json">https://www.epicov.org/acknowledgement/26/50/EPI_ISL_632650.json</a> |
| Netherlands/GE-EMC-319/2020 | EPI_ISL_632480 | Dutch COVID-19 response team | Erasmus Medical Center | Bas Oude Munnink et al | <a href="https://www.epicov.org/acknowledgement/24/80/EPI_ISL_632480.json">https://www.epicov.org/acknowledgement/24/80/EPI_ISL_632480.json</a> |
| Netherlands/GE-EMC-320/2020 | EPI_ISL_632651 | Dutch COVID-19 response team | Erasmus Medical Center | Bas Oude Munnink et al | <a href="https://www.epicov.org/acknowledgement/26/51/EPI_ISL_632651.json">https://www.epicov.org/acknowledgement/26/51/EPI_ISL_632651.json</a> |
| Netherlands/GE-EMC-321/2020 | EPI_ISL_632653 | Dutch COVID-19 response team | Erasmus Medical Center | Bas Oude Munnink et al | <a href="https://www.epicov.org/acknowledgement/26/53/EPI_ISL_632653.json">https://www.epicov.org/acknowledgement/26/53/EPI_ISL_632653.json</a> |
| Netherlands/GE-EMC-322/2020 | EPI_ISL_632481 | Dutch COVID-19 response team | Erasmus Medical Center | Bas Oude Munnink et al | <a href="https://www.epicov.org/acknowledgement/24/81/EPI_ISL_632481.json">https://www.epicov.org/acknowledgement/24/81/EPI_ISL_632481.json</a> |
| Netherlands/GE-EMC-325/2020 | EPI_ISL_632408 | Dutch COVID-19 response team | Erasmus Medical Center | Bas Oude Munnink et al | <a href="https://www.epicov.org/acknowledgement/24/08/EPI_ISL_632408.json">https://www.epicov.org/acknowledgement/24/08/EPI_ISL_632408.json</a> |
| Netherlands/GE-EMC-327/2020 | EPI_ISL_632711 | Dutch COVID-19 response team | Erasmus Medical Center | Bas Oude Munnink et al | <a href="https://www.epicov.org/acknowledgement/27/11/EPI_ISL_632711.json">https://www.epicov.org/acknowledgement/27/11/EPI_ISL_632711.json</a> |
| Netherlands/GE-EMC-328/2020 | EPI_ISL_632712 | Dutch COVID-19 response team | Erasmus Medical Center | Bas Oude Munnink et al | <a href="https://www.epicov.org/acknowledgement/27/12/EPI_ISL_632712.json">https://www.epicov.org/acknowledgement/27/12/EPI_ISL_632712.json</a> |
| Netherlands/GE-EMC-330/2020 | EPI_ISL_632425 | Dutch COVID-19 response team | Erasmus Medical Center | Bas Oude Munnink et al | <a href="https://www.epicov.org/acknowledgement/24/25/EPI_ISL_632425.json">https://www.epicov.org/acknowledgement/24/25/EPI_ISL_632425.json</a> |

| seq_id                         | gisaid_epi_isl  | originating_lab              | submitting_lab                                                  | authors                | url                                                                                                                                               |
|--------------------------------|-----------------|------------------------------|-----------------------------------------------------------------|------------------------|---------------------------------------------------------------------------------------------------------------------------------------------------|
| Netherlands/GE-EMC-331/2020    | EPI_ISL_632404  | Dutch COVID-19 response team | Erasmus Medical Center                                          | Bas Oude Munnink et al | <a href="https://www.epicov.org/acknowledgement/24/04/EPI_ISL_632404.json">https://www.epicov.org/acknowledgement/24/04/EPI_ISL_632404.json</a>   |
| Netherlands/GE-EMC-333/2020    | EPI_ISL_632322  | Dutch COVID-19 response team | Erasmus Medical Center                                          | Bas Oude Munnink et al | <a href="https://www.epicov.org/acknowledgement/23/22/EPI_ISL_632322.json">https://www.epicov.org/acknowledgement/23/22/EPI_ISL_632322.json</a>   |
| Netherlands/GE-EMC-335/2020    | EPI_ISL_632395  | Dutch COVID-19 response team | Erasmus Medical Center                                          | Bas Oude Munnink et al | <a href="https://www.epicov.org/acknowledgement/23/95/EPI_ISL_632395.json">https://www.epicov.org/acknowledgement/23/95/EPI_ISL_632395.json</a>   |
| Netherlands/GE-EMC-340/2020    | EPI_ISL_632739  | Dutch COVID-19 response team | Erasmus Medical Center                                          | Bas Oude Munnink et al | <a href="https://www.epicov.org/acknowledgement/27/39/EPI_ISL_632739.json">https://www.epicov.org/acknowledgement/27/39/EPI_ISL_632739.json</a>   |
| Netherlands/GE-EMC-341/2020    | EPI_ISL_632393  | Dutch COVID-19 response team | Erasmus Medical Center                                          | Bas Oude Munnink et al | <a href="https://www.epicov.org/acknowledgement/23/93/EPI_ISL_632393.json">https://www.epicov.org/acknowledgement/23/93/EPI_ISL_632393.json</a>   |
| Netherlands/GE-EMC-345/2020    | EPI_ISL_632394  | Dutch COVID-19 response team | Erasmus Medical Center                                          | Bas Oude Munnink et al | <a href="https://www.epicov.org/acknowledgement/23/94/EPI_ISL_632394.json">https://www.epicov.org/acknowledgement/23/94/EPI_ISL_632394.json</a>   |
| Netherlands/GE-EMC-346/2020    | EPI_ISL_632745  | Dutch COVID-19 response team | Erasmus Medical Center                                          | Bas Oude Munnink et al | <a href="https://www.epicov.org/acknowledgement/27/45/EPI_ISL_632745.json">https://www.epicov.org/acknowledgement/27/45/EPI_ISL_632745.json</a>   |
| Netherlands/GE-EMC-348/2020    | EPI_ISL_632764  | Dutch COVID-19 response team | Erasmus Medical Center                                          | Bas Oude Munnink et al | <a href="https://www.epicov.org/acknowledgement/27/64/EPI_ISL_632764.json">https://www.epicov.org/acknowledgement/27/64/EPI_ISL_632764.json</a>   |
| Netherlands/GE-EMC-355/2020    | EPI_ISL_722497  | Dutch COVID-19 response team | Erasmus Medical Center                                          | Bas Oude Munnink et al | <a href="https://www.epicov.org/acknowledgement/24/97/EPI_ISL_722497.json">https://www.epicov.org/acknowledgement/24/97/EPI_ISL_722497.json</a>   |
| Netherlands/GE-EMC-356/2020    | EPI_ISL_722522  | Dutch COVID-19 response team | Erasmus Medical Center                                          | Bas Oude Munnink et al | <a href="https://www.epicov.org/acknowledgement/25/22/EPI_ISL_722522.json">https://www.epicov.org/acknowledgement/25/22/EPI_ISL_722522.json</a>   |
| Netherlands/GE-EMC-357/2020    | EPI_ISL_722559  | Dutch COVID-19 response team | Erasmus Medical Center                                          | Bas Oude Munnink et al | <a href="https://www.epicov.org/acknowledgement/25/59/EPI_ISL_722559.json">https://www.epicov.org/acknowledgement/25/59/EPI_ISL_722559.json</a>   |
| Netherlands/GE-EMC-369/2020    | EPI_ISL_722570  | Dutch COVID-19 response team | Erasmus Medical Center                                          | Bas Oude Munnink et al | <a href="https://www.epicov.org/acknowledgement/25/70/EPI_ISL_722570.json">https://www.epicov.org/acknowledgement/25/70/EPI_ISL_722570.json</a>   |
| Netherlands/GE-EMC-379/2020    | EPI_ISL_722498  | Dutch COVID-19 response team | Erasmus Medical Center                                          | Bas Oude Munnink et al | <a href="https://www.epicov.org/acknowledgement/24/98/EPI_ISL_722498.json">https://www.epicov.org/acknowledgement/24/98/EPI_ISL_722498.json</a>   |
| Netherlands/GE-EMC-380/2020    | EPI_ISL_722442  | Dutch COVID-19 response team | Erasmus Medical Center                                          | Bas Oude Munnink et al | <a href="https://www.epicov.org/acknowledgement/24/42/EPI_ISL_722442.json">https://www.epicov.org/acknowledgement/24/42/EPI_ISL_722442.json</a>   |
| Netherlands/GE-EMC-384/2020    | EPI_ISL_722444  | Dutch COVID-19 response team | Erasmus Medical Center                                          | Bas Oude Munnink et al | <a href="https://www.epicov.org/acknowledgement/24/44/EPI_ISL_722444.json">https://www.epicov.org/acknowledgement/24/44/EPI_ISL_722444.json</a>   |
| Netherlands/GE-EMC-392/2020    | EPI_ISL_722838  | Dutch COVID-19 response team | Erasmus Medical Center                                          | Bas Oude Munnink et al | <a href="https://www.epicov.org/acknowledgement/28/38/EPI_ISL_722838.json">https://www.epicov.org/acknowledgement/28/38/EPI_ISL_722838.json</a>   |
| Netherlands/GE-EMC-397/2020    | EPI_ISL_722511  | Dutch COVID-19 response team | Erasmus Medical Center                                          | Bas Oude Munnink et al | <a href="https://www.epicov.org/acknowledgement/25/11/EPI_ISL_722511.json">https://www.epicov.org/acknowledgement/25/11/EPI_ISL_722511.json</a>   |
| Netherlands/GE-EMC-403/2020    | EPI_ISL_722546  | Dutch COVID-19 response team | Erasmus Medical Center                                          | Bas Oude Munnink et al | <a href="https://www.epicov.org/acknowledgement/25/46/EPI_ISL_722546.json">https://www.epicov.org/acknowledgement/25/46/EPI_ISL_722546.json</a>   |
| Netherlands/GE-EMC-404/2020    | EPI_ISL_722571  | Dutch COVID-19 response team | Erasmus Medical Center                                          | Bas Oude Munnink et al | <a href="https://www.epicov.org/acknowledgement/25/71/EPI_ISL_722571.json">https://www.epicov.org/acknowledgement/25/71/EPI_ISL_722571.json</a>   |
| Netherlands/GE-EMC-405/2020    | EPI_ISL_722362  | Dutch COVID-19 response team | Erasmus Medical Center                                          | Bas Oude Munnink et al | <a href="https://www.epicov.org/acknowledgement/23/62/EPI_ISL_722362.json">https://www.epicov.org/acknowledgement/23/62/EPI_ISL_722362.json</a>   |
| Netherlands/GE-EMC-416/2020    | EPI_ISL_722283  | Dutch COVID-19 response team | Erasmus Medical Center                                          | Bas Oude Munnink et al | <a href="https://www.epicov.org/acknowledgement/22/83/EPI_ISL_722283.json">https://www.epicov.org/acknowledgement/22/83/EPI_ISL_722283.json</a>   |
| Netherlands/GE-EMC-434/2020    | EPI_ISL_722818  | Dutch COVID-19 response team | Erasmus Medical Center                                          | Bas Oude Munnink et al | <a href="https://www.epicov.org/acknowledgement/28/18/EPI_ISL_722818.json">https://www.epicov.org/acknowledgement/28/18/EPI_ISL_722818.json</a>   |
| Netherlands/GE-RIVM-10382/2020 | EPI_ISL_636536  | Dutch COVID-19 response team | National Institute for Public Health and the Environment (RIVM) | Adam Meijer et al      | <a href="https://www.epicov.org/acknowledgement/65/36/EPI_ISL_636536.json">https://www.epicov.org/acknowledgement/65/36/EPI_ISL_636536.json</a>   |
| Netherlands/GE-RIVM-10401/2020 | EPI_ISL_636538  | Dutch COVID-19 response team | National Institute for Public Health and the Environment (RIVM) | Adam Meijer et al      | <a href="https://www.epicov.org/acknowledgement/65/38/EPI_ISL_636538.json">https://www.epicov.org/acknowledgement/65/38/EPI_ISL_636538.json</a>   |
| Netherlands/GE-RIVM-21772/2020 | EPI_ISL_1498159 | Dutch COVID-19 response team | National Institute for Public Health and the Environment (RIVM) | Adam Meijer et al      | <a href="https://www.epicov.org/acknowledgement/81/59/EPI_ISL_1498159.json">https://www.epicov.org/acknowledgement/81/59/EPI_ISL_1498159.json</a> |

| seq_id                          | gisaid_epi_isl  | originating_lab              | submitting_lab                                                  | authors                | url                                                                                                                                               |
|---------------------------------|-----------------|------------------------------|-----------------------------------------------------------------|------------------------|---------------------------------------------------------------------------------------------------------------------------------------------------|
| Netherlands/GE-RIVM-21773/2020  | EPI_ISL_1498160 | Dutch COVID-19 response team | National Institute for Public Health and the Environment (RIVM) | Adam Meijer et al      | <a href="https://www.epicov.org/acknowledgement/81/60/EPI_ISL_1498160.json">https://www.epicov.org/acknowledgement/81/60/EPI_ISL_1498160.json</a> |
| Netherlands/GE-RIVM-21817/2020  | EPI_ISL_1498204 | Dutch COVID-19 response team | National Institute for Public Health and the Environment (RIVM) | Adam Meijer et al      | <a href="https://www.epicov.org/acknowledgement/82/04/EPI_ISL_1498204.json">https://www.epicov.org/acknowledgement/82/04/EPI_ISL_1498204.json</a> |
| Netherlands/GE-RIVM-21839/2020  | EPI_ISL_1498226 | Dutch COVID-19 response team | National Institute for Public Health and the Environment (RIVM) | Adam Meijer et al      | <a href="https://www.epicov.org/acknowledgement/82/26/EPI_ISL_1498226.json">https://www.epicov.org/acknowledgement/82/26/EPI_ISL_1498226.json</a> |
| Netherlands/Gelderland_103/2020 | EPI_ISL_460864  | Dutch COVID-19 response team | Erasmus Medical Center                                          | Bas Oude Munnink et al | <a href="https://www.epicov.org/acknowledgement/08/64/EPI_ISL_460864.json">https://www.epicov.org/acknowledgement/08/64/EPI_ISL_460864.json</a>   |
| Netherlands/Gelderland_104/2020 | EPI_ISL_460865  | Dutch COVID-19 response team | Erasmus Medical Center                                          | Bas Oude Munnink et al | <a href="https://www.epicov.org/acknowledgement/08/65/EPI_ISL_460865.json">https://www.epicov.org/acknowledgement/08/65/EPI_ISL_460865.json</a>   |
| Netherlands/Gelderland_105/2020 | EPI_ISL_460866  | Dutch COVID-19 response team | Erasmus Medical Center                                          | Bas Oude Munnink et al | <a href="https://www.epicov.org/acknowledgement/08/66/EPI_ISL_460866.json">https://www.epicov.org/acknowledgement/08/66/EPI_ISL_460866.json</a>   |
| Netherlands/Gelderland_107/2020 | EPI_ISL_460868  | Dutch COVID-19 response team | Erasmus Medical Center                                          | Bas Oude Munnink et al | <a href="https://www.epicov.org/acknowledgement/08/68/EPI_ISL_460868.json">https://www.epicov.org/acknowledgement/08/68/EPI_ISL_460868.json</a>   |
| Netherlands/Gelderland_110/2020 | EPI_ISL_460871  | Dutch COVID-19 response team | Erasmus Medical Center                                          | Bas Oude Munnink et al | <a href="https://www.epicov.org/acknowledgement/08/71/EPI_ISL_460871.json">https://www.epicov.org/acknowledgement/08/71/EPI_ISL_460871.json</a>   |
| Netherlands/Gelderland_112/2020 | EPI_ISL_460873  | Dutch COVID-19 response team | Erasmus Medical Center                                          | Bas Oude Munnink et al | <a href="https://www.epicov.org/acknowledgement/08/73/EPI_ISL_460873.json">https://www.epicov.org/acknowledgement/08/73/EPI_ISL_460873.json</a>   |
| Netherlands/Gelderland_114/2020 | EPI_ISL_460875  | Dutch COVID-19 response team | Erasmus Medical Center                                          | Bas Oude Munnink et al | <a href="https://www.epicov.org/acknowledgement/08/75/EPI_ISL_460875.json">https://www.epicov.org/acknowledgement/08/75/EPI_ISL_460875.json</a>   |
| Netherlands/Gelderland_116/2020 | EPI_ISL_460877  | Dutch COVID-19 response team | Erasmus Medical Center                                          | Bas Oude Munnink et al | <a href="https://www.epicov.org/acknowledgement/08/77/EPI_ISL_460877.json">https://www.epicov.org/acknowledgement/08/77/EPI_ISL_460877.json</a>   |
| Netherlands/Gelderland_117/2020 | EPI_ISL_460878  | Dutch COVID-19 response team | Erasmus Medical Center                                          | Bas Oude Munnink et al | <a href="https://www.epicov.org/acknowledgement/08/78/EPI_ISL_460878.json">https://www.epicov.org/acknowledgement/08/78/EPI_ISL_460878.json</a>   |
| Netherlands/Gelderland_118/2020 | EPI_ISL_460879  | Dutch COVID-19 response team | Erasmus Medical Center                                          | Bas Oude Munnink et al | <a href="https://www.epicov.org/acknowledgement/08/79/EPI_ISL_460879.json">https://www.epicov.org/acknowledgement/08/79/EPI_ISL_460879.json</a>   |
| Netherlands/Gelderland_124/2020 | EPI_ISL_460885  | Dutch COVID-19 response team | Erasmus Medical Center                                          | Bas Oude Munnink et al | <a href="https://www.epicov.org/acknowledgement/08/85/EPI_ISL_460885.json">https://www.epicov.org/acknowledgement/08/85/EPI_ISL_460885.json</a>   |
| Netherlands/Gelderland_128/2020 | EPI_ISL_460889  | Dutch COVID-19 response team | Erasmus Medical Center                                          | Bas Oude Munnink et al | <a href="https://www.epicov.org/acknowledgement/08/89/EPI_ISL_460889.json">https://www.epicov.org/acknowledgement/08/89/EPI_ISL_460889.json</a>   |
| Netherlands/Gelderland_132/2020 | EPI_ISL_460892  | Dutch COVID-19 response team | Erasmus Medical Center                                          | Bas Oude Munnink et al | <a href="https://www.epicov.org/acknowledgement/08/92/EPI_ISL_460892.json">https://www.epicov.org/acknowledgement/08/92/EPI_ISL_460892.json</a>   |
| Netherlands/Gelderland_133/2020 | EPI_ISL_460893  | Dutch COVID-19 response team | Erasmus Medical Center                                          | Bas Oude Munnink et al | <a href="https://www.epicov.org/acknowledgement/08/93/EPI_ISL_460893.json">https://www.epicov.org/acknowledgement/08/93/EPI_ISL_460893.json</a>   |
| Netherlands/Gelderland_134/2020 | EPI_ISL_460894  | Dutch COVID-19 response team | Erasmus Medical Center                                          | Bas Oude Munnink et al | <a href="https://www.epicov.org/acknowledgement/08/94/EPI_ISL_460894.json">https://www.epicov.org/acknowledgement/08/94/EPI_ISL_460894.json</a>   |
| Netherlands/Gelderland_137/2020 | EPI_ISL_460897  | Dutch COVID-19 response team | Erasmus Medical Center                                          | Bas Oude Munnink et al | <a href="https://www.epicov.org/acknowledgement/08/97/EPI_ISL_460897.json">https://www.epicov.org/acknowledgement/08/97/EPI_ISL_460897.json</a>   |
| Netherlands/Gelderland_138/2020 | EPI_ISL_460898  | Dutch COVID-19 response team | Erasmus Medical Center                                          | Bas Oude Munnink et al | <a href="https://www.epicov.org/acknowledgement/08/98/EPI_ISL_460898.json">https://www.epicov.org/acknowledgement/08/98/EPI_ISL_460898.json</a>   |
| Netherlands/Gelderland_146/2020 | EPI_ISL_460906  | Dutch COVID-19 response team | Erasmus Medical Center                                          | Bas Oude Munnink et al | <a href="https://www.epicov.org/acknowledgement/09/06/EPI_ISL_460906.json">https://www.epicov.org/acknowledgement/09/06/EPI_ISL_460906.json</a>   |
| Netherlands/Gelderland_147/2020 | EPI_ISL_460907  | Dutch COVID-19 response team | Erasmus Medical Center                                          | Bas Oude Munnink et al | <a href="https://www.epicov.org/acknowledgement/09/07/EPI_ISL_460907.json">https://www.epicov.org/acknowledgement/09/07/EPI_ISL_460907.json</a>   |
| Netherlands/Gelderland_150/2020 | EPI_ISL_460910  | Dutch COVID-19 response team | Erasmus Medical Center                                          | Bas Oude Munnink et al | <a href="https://www.epicov.org/acknowledgement/09/10/EPI_ISL_460910.json">https://www.epicov.org/acknowledgement/09/10/EPI_ISL_460910.json</a>   |
| Netherlands/Gelderland_151/2020 | EPI_ISL_460911  | Dutch COVID-19 response team | Erasmus Medical Center                                          | Bas Oude Munnink et al | <a href="https://www.epicov.org/acknowledgement/09/11/EPI_ISL_460911.json">https://www.epicov.org/acknowledgement/09/11/EPI_ISL_460911.json</a>   |
| Netherlands/Gelderland_152/2020 | EPI_ISL_460912  | Dutch COVID-19 response team | Erasmus Medical Center                                          | Bas Oude Munnink et al | <a href="https://www.epicov.org/acknowledgement/09/12/EPI_ISL_460912.json">https://www.epicov.org/acknowledgement/09/12/EPI_ISL_460912.json</a>   |

| seq_id                          | gisaid_epi_isl | originating_lab              | submitting_lab         | authors                | url                                                                                                                                             |
|---------------------------------|----------------|------------------------------|------------------------|------------------------|-------------------------------------------------------------------------------------------------------------------------------------------------|
| Netherlands/Gelderland_154/2020 | EPI_ISL_460914 | Dutch COVID-19 response team | Erasmus Medical Center | Bas Oude Munnink et al | <a href="https://www.epicov.org/acknowledgement/09/14/EPI_ISL_460914.json">https://www.epicov.org/acknowledgement/09/14/EPI_ISL_460914.json</a> |
| Netherlands/Gelderland_156/2020 | EPI_ISL_460916 | Dutch COVID-19 response team | Erasmus Medical Center | Bas Oude Munnink et al | <a href="https://www.epicov.org/acknowledgement/09/16/EPI_ISL_460916.json">https://www.epicov.org/acknowledgement/09/16/EPI_ISL_460916.json</a> |
| Netherlands/Gelderland_160/2020 | EPI_ISL_460920 | Dutch COVID-19 response team | Erasmus Medical Center | Bas Oude Munnink et al | <a href="https://www.epicov.org/acknowledgement/09/20/EPI_ISL_460920.json">https://www.epicov.org/acknowledgement/09/20/EPI_ISL_460920.json</a> |
| Netherlands/Gelderland_45/2020  | EPI_ISL_460945 | Dutch COVID-19 response team | Erasmus Medical Center | Bas Oude Munnink et al | <a href="https://www.epicov.org/acknowledgement/09/45/EPI_ISL_460945.json">https://www.epicov.org/acknowledgement/09/45/EPI_ISL_460945.json</a> |
| Netherlands/Gelderland_49/2020  | EPI_ISL_460949 | Dutch COVID-19 response team | Erasmus Medical Center | Bas Oude Munnink et al | <a href="https://www.epicov.org/acknowledgement/09/49/EPI_ISL_460949.json">https://www.epicov.org/acknowledgement/09/49/EPI_ISL_460949.json</a> |
| Netherlands/Gelderland_54/2020  | EPI_ISL_460953 | Dutch COVID-19 response team | Erasmus Medical Center | Bas Oude Munnink et al | <a href="https://www.epicov.org/acknowledgement/09/53/EPI_ISL_460953.json">https://www.epicov.org/acknowledgement/09/53/EPI_ISL_460953.json</a> |
| Netherlands/Gelderland_55/2020  | EPI_ISL_460954 | Dutch COVID-19 response team | Erasmus Medical Center | Bas Oude Munnink et al | <a href="https://www.epicov.org/acknowledgement/09/54/EPI_ISL_460954.json">https://www.epicov.org/acknowledgement/09/54/EPI_ISL_460954.json</a> |
| Netherlands/Gelderland_57/2020  | EPI_ISL_460956 | Dutch COVID-19 response team | Erasmus Medical Center | Bas Oude Munnink et al | <a href="https://www.epicov.org/acknowledgement/09/56/EPI_ISL_460956.json">https://www.epicov.org/acknowledgement/09/56/EPI_ISL_460956.json</a> |
| Netherlands/Gelderland_60/2020  | EPI_ISL_460959 | Dutch COVID-19 response team | Erasmus Medical Center | Bas Oude Munnink et al | <a href="https://www.epicov.org/acknowledgement/09/59/EPI_ISL_460959.json">https://www.epicov.org/acknowledgement/09/59/EPI_ISL_460959.json</a> |
| Netherlands/Gelderland_61/2020  | EPI_ISL_460960 | Dutch COVID-19 response team | Erasmus Medical Center | Bas Oude Munnink et al | <a href="https://www.epicov.org/acknowledgement/09/60/EPI_ISL_460960.json">https://www.epicov.org/acknowledgement/09/60/EPI_ISL_460960.json</a> |
| Netherlands/Gelderland_62/2020  | EPI_ISL_460961 | Dutch COVID-19 response team | Erasmus Medical Center | Bas Oude Munnink et al | <a href="https://www.epicov.org/acknowledgement/09/61/EPI_ISL_460961.json">https://www.epicov.org/acknowledgement/09/61/EPI_ISL_460961.json</a> |
| Netherlands/Gelderland_63/2020  | EPI_ISL_460962 | Dutch COVID-19 response team | Erasmus Medical Center | Bas Oude Munnink et al | <a href="https://www.epicov.org/acknowledgement/09/62/EPI_ISL_460962.json">https://www.epicov.org/acknowledgement/09/62/EPI_ISL_460962.json</a> |
| Netherlands/Gelderland_65/2020  | EPI_ISL_460964 | Dutch COVID-19 response team | Erasmus Medical Center | Bas Oude Munnink et al | <a href="https://www.epicov.org/acknowledgement/09/64/EPI_ISL_460964.json">https://www.epicov.org/acknowledgement/09/64/EPI_ISL_460964.json</a> |
| Netherlands/Gelderland_67/2020  | EPI_ISL_460966 | Dutch COVID-19 response team | Erasmus Medical Center | Bas Oude Munnink et al | <a href="https://www.epicov.org/acknowledgement/09/66/EPI_ISL_460966.json">https://www.epicov.org/acknowledgement/09/66/EPI_ISL_460966.json</a> |
| Netherlands/Gelderland_69/2020  | EPI_ISL_460968 | Dutch COVID-19 response team | Erasmus Medical Center | Bas Oude Munnink et al | <a href="https://www.epicov.org/acknowledgement/09/68/EPI_ISL_460968.json">https://www.epicov.org/acknowledgement/09/68/EPI_ISL_460968.json</a> |
| Netherlands/Gelderland_73/2020  | EPI_ISL_460972 | Dutch COVID-19 response team | Erasmus Medical Center | Bas Oude Munnink et al | <a href="https://www.epicov.org/acknowledgement/09/72/EPI_ISL_460972.json">https://www.epicov.org/acknowledgement/09/72/EPI_ISL_460972.json</a> |
| Netherlands/Gelderland_74/2020  | EPI_ISL_460973 | Dutch COVID-19 response team | Erasmus Medical Center | Bas Oude Munnink et al | <a href="https://www.epicov.org/acknowledgement/09/73/EPI_ISL_460973.json">https://www.epicov.org/acknowledgement/09/73/EPI_ISL_460973.json</a> |
| Netherlands/Gelderland_75/2020  | EPI_ISL_460974 | Dutch COVID-19 response team | Erasmus Medical Center | Bas Oude Munnink et al | <a href="https://www.epicov.org/acknowledgement/09/74/EPI_ISL_460974.json">https://www.epicov.org/acknowledgement/09/74/EPI_ISL_460974.json</a> |
| Netherlands/Gelderland_76/2020  | EPI_ISL_460975 | Dutch COVID-19 response team | Erasmus Medical Center | Bas Oude Munnink et al | <a href="https://www.epicov.org/acknowledgement/09/75/EPI_ISL_460975.json">https://www.epicov.org/acknowledgement/09/75/EPI_ISL_460975.json</a> |
| Netherlands/Gelderland_78/2020  | EPI_ISL_460977 | Dutch COVID-19 response team | Erasmus Medical Center | Bas Oude Munnink et al | <a href="https://www.epicov.org/acknowledgement/09/77/EPI_ISL_460977.json">https://www.epicov.org/acknowledgement/09/77/EPI_ISL_460977.json</a> |
| Netherlands/Gelderland_79/2020  | EPI_ISL_460978 | Dutch COVID-19 response team | Erasmus Medical Center | Bas Oude Munnink et al | <a href="https://www.epicov.org/acknowledgement/09/78/EPI_ISL_460978.json">https://www.epicov.org/acknowledgement/09/78/EPI_ISL_460978.json</a> |
| Netherlands/Gelderland_86/2020  | EPI_ISL_460985 | Dutch COVID-19 response team | Erasmus Medical Center | Bas Oude Munnink et al | <a href="https://www.epicov.org/acknowledgement/09/85/EPI_ISL_460985.json">https://www.epicov.org/acknowledgement/09/85/EPI_ISL_460985.json</a> |
| Netherlands/Gelderland_87/2020  | EPI_ISL_460986 | Dutch COVID-19 response team | Erasmus Medical Center | Bas Oude Munnink et al | <a href="https://www.epicov.org/acknowledgement/09/86/EPI_ISL_460986.json">https://www.epicov.org/acknowledgement/09/86/EPI_ISL_460986.json</a> |
| Netherlands/Gelderland_88/2020  | EPI_ISL_460987 | Dutch COVID-19 response team | Erasmus Medical Center | Bas Oude Munnink et al | <a href="https://www.epicov.org/acknowledgement/09/87/EPI_ISL_460987.json">https://www.epicov.org/acknowledgement/09/87/EPI_ISL_460987.json</a> |
| Netherlands/Gelderland_89/2020  | EPI_ISL_460988 | Dutch COVID-19 response team | Erasmus Medical Center | Bas Oude Munnink et al | <a href="https://www.epicov.org/acknowledgement/09/88/EPI_ISL_460988.json">https://www.epicov.org/acknowledgement/09/88/EPI_ISL_460988.json</a> |

| seq_id                         | gisaid_epi_isl  | originating_lab              | submitting_lab                                                  | authors                | url                                                                                                                                               |
|--------------------------------|-----------------|------------------------------|-----------------------------------------------------------------|------------------------|---------------------------------------------------------------------------------------------------------------------------------------------------|
| Netherlands/Gelderland_92/2020 | EPI_ISL_460991  | Dutch COVID-19 response team | Erasmus Medical Center                                          | Bas Oude Munnink et al | <a href="https://www.epicov.org/acknowledgement/09/91/EPI_ISL_460991.json">https://www.epicov.org/acknowledgement/09/91/EPI_ISL_460991.json</a>   |
| Netherlands/Gelderland_95/2020 | EPI_ISL_460994  | Dutch COVID-19 response team | Erasmus Medical Center                                          | Bas Oude Munnink et al | <a href="https://www.epicov.org/acknowledgement/09/94/EPI_ISL_460994.json">https://www.epicov.org/acknowledgement/09/94/EPI_ISL_460994.json</a>   |
| Netherlands/Gelderland_96/2020 | EPI_ISL_460995  | Dutch COVID-19 response team | Erasmus Medical Center                                          | Bas Oude Munnink et al | <a href="https://www.epicov.org/acknowledgement/09/95/EPI_ISL_460995.json">https://www.epicov.org/acknowledgement/09/95/EPI_ISL_460995.json</a>   |
| Netherlands/Gelderland_97/2020 | EPI_ISL_460996  | Dutch COVID-19 response team | Erasmus Medical Center                                          | Bas Oude Munnink et al | <a href="https://www.epicov.org/acknowledgement/09/96/EPI_ISL_460996.json">https://www.epicov.org/acknowledgement/09/96/EPI_ISL_460996.json</a>   |
| Netherlands/Gelderland_98/2020 | EPI_ISL_460997  | Dutch COVID-19 response team | Erasmus Medical Center                                          | Bas Oude Munnink et al | <a href="https://www.epicov.org/acknowledgement/09/97/EPI_ISL_460997.json">https://www.epicov.org/acknowledgement/09/97/EPI_ISL_460997.json</a>   |
| Netherlands/GR-RIVM-21688/2020 | EPI_ISL_1014462 | Dutch COVID-19 response team | National Institute for Public Health and the Environment (RIVM) | Adam Meijer et al      | <a href="https://www.epicov.org/acknowledgement/44/62/EPI_ISL_1014462.json">https://www.epicov.org/acknowledgement/44/62/EPI_ISL_1014462.json</a> |
| Netherlands/GR-RIVM-21689/2020 | EPI_ISL_1014461 | Dutch COVID-19 response team | National Institute for Public Health and the Environment (RIVM) | Adam Meijer et al      | <a href="https://www.epicov.org/acknowledgement/44/61/EPI_ISL_1014461.json">https://www.epicov.org/acknowledgement/44/61/EPI_ISL_1014461.json</a> |
| Netherlands/GR-RIVM-21690/2020 | EPI_ISL_1014460 | Dutch COVID-19 response team | National Institute for Public Health and the Environment (RIVM) | Adam Meijer et al      | <a href="https://www.epicov.org/acknowledgement/44/60/EPI_ISL_1014460.json">https://www.epicov.org/acknowledgement/44/60/EPI_ISL_1014460.json</a> |
| Netherlands/GR-RIVM-21696/2020 | EPI_ISL_1014457 | Dutch COVID-19 response team | National Institute for Public Health and the Environment (RIVM) | Adam Meijer et al      | <a href="https://www.epicov.org/acknowledgement/44/57/EPI_ISL_1014457.json">https://www.epicov.org/acknowledgement/44/57/EPI_ISL_1014457.json</a> |
| Netherlands/GR-RIVM-21781/2020 | EPI_ISL_1498168 | Dutch COVID-19 response team | National Institute for Public Health and the Environment (RIVM) | Adam Meijer et al      | <a href="https://www.epicov.org/acknowledgement/81/68/EPI_ISL_1498168.json">https://www.epicov.org/acknowledgement/81/68/EPI_ISL_1498168.json</a> |
| Netherlands/LI-EMC-100/2020    | EPI_ISL_632761  | Dutch COVID-19 response team | Erasmus Medical Center                                          | Bas Oude Munnink et al | <a href="https://www.epicov.org/acknowledgement/27/61/EPI_ISL_632761.json">https://www.epicov.org/acknowledgement/27/61/EPI_ISL_632761.json</a>   |
| Netherlands/LI-EMC-101/2020    | EPI_ISL_722412  | Dutch COVID-19 response team | Erasmus Medical Center                                          | Bas Oude Munnink et al | <a href="https://www.epicov.org/acknowledgement/24/12/EPI_ISL_722412.json">https://www.epicov.org/acknowledgement/24/12/EPI_ISL_722412.json</a>   |
| Netherlands/LI-EMC-105/2020    | EPI_ISL_722575  | Dutch COVID-19 response team | Erasmus Medical Center                                          | Bas Oude Munnink et al | <a href="https://www.epicov.org/acknowledgement/25/75/EPI_ISL_722575.json">https://www.epicov.org/acknowledgement/25/75/EPI_ISL_722575.json</a>   |
| Netherlands/LI-EMC-110/2020    | EPI_ISL_722578  | Dutch COVID-19 response team | Erasmus Medical Center                                          | Bas Oude Munnink et al | <a href="https://www.epicov.org/acknowledgement/25/78/EPI_ISL_722578.json">https://www.epicov.org/acknowledgement/25/78/EPI_ISL_722578.json</a>   |
| Netherlands/LI-EMC-123/2020    | EPI_ISL_722445  | Dutch COVID-19 response team | Erasmus Medical Center                                          | Bas Oude Munnink et al | <a href="https://www.epicov.org/acknowledgement/24/45/EPI_ISL_722445.json">https://www.epicov.org/acknowledgement/24/45/EPI_ISL_722445.json</a>   |
| Netherlands/LI-EMC-141/2020    | EPI_ISL_763109  | Dutch COVID-19 response team | Erasmus Medical Center                                          | Bas Oude Munnink et al | <a href="https://www.epicov.org/acknowledgement/31/09/EPI_ISL_763109.json">https://www.epicov.org/acknowledgement/31/09/EPI_ISL_763109.json</a>   |
| Netherlands/LI-EMC-196/2020    | EPI_ISL_801483  | Dutch COVID-19 response team | Erasmus Medical Center                                          | Bas Oude Munnink et al | <a href="https://www.epicov.org/acknowledgement/14/83/EPI_ISL_801483.json">https://www.epicov.org/acknowledgement/14/83/EPI_ISL_801483.json</a>   |
| Netherlands/LI-EMC-198/2020    | EPI_ISL_801485  | Dutch COVID-19 response team | Erasmus Medical Center                                          | Bas Oude Munnink et al | <a href="https://www.epicov.org/acknowledgement/14/85/EPI_ISL_801485.json">https://www.epicov.org/acknowledgement/14/85/EPI_ISL_801485.json</a>   |
| Netherlands/LI-EMC-202/2020    | EPI_ISL_801420  | Dutch COVID-19 response team | Erasmus Medical Center                                          | Bas Oude Munnink et al | <a href="https://www.epicov.org/acknowledgement/14/20/EPI_ISL_801420.json">https://www.epicov.org/acknowledgement/14/20/EPI_ISL_801420.json</a>   |
| Netherlands/LI-EMC-203/2020    | EPI_ISL_801487  | Dutch COVID-19 response team | Erasmus Medical Center                                          | Bas Oude Munnink et al | <a href="https://www.epicov.org/acknowledgement/14/87/EPI_ISL_801487.json">https://www.epicov.org/acknowledgement/14/87/EPI_ISL_801487.json</a>   |
| Netherlands/LI-EMC-207/2020    | EPI_ISL_801404  | Dutch COVID-19 response team | Erasmus Medical Center                                          | Bas Oude Munnink et al | <a href="https://www.epicov.org/acknowledgement/14/04/EPI_ISL_801404.json">https://www.epicov.org/acknowledgement/14/04/EPI_ISL_801404.json</a>   |
| Netherlands/LI-EMC-231/2020    | EPI_ISL_904450  | Dutch COVID-19 response team | Erasmus Medical Center                                          | Bas Oude Munnink et al | <a href="https://www.epicov.org/acknowledgement/44/50/EPI_ISL_904450.json">https://www.epicov.org/acknowledgement/44/50/EPI_ISL_904450.json</a>   |
| Netherlands/LI-EMC-232/2020    | EPI_ISL_904154  | Dutch COVID-19 response team | Erasmus Medical Center                                          | Bas Oude Munnink et al | <a href="https://www.epicov.org/acknowledgement/41/54/EPI_ISL_904154.json">https://www.epicov.org/acknowledgement/41/54/EPI_ISL_904154.json</a>   |
| Netherlands/LI-EMC-233/2020    | EPI_ISL_904453  | Dutch COVID-19 response team | Erasmus Medical Center                                          | Bas Oude Munnink et al | <a href="https://www.epicov.org/acknowledgement/44/53/EPI_ISL_904453.json">https://www.epicov.org/acknowledgement/44/53/EPI_ISL_904453.json</a>   |
| Netherlands/LI-EMC-234/2020    | EPI_ISL_904252  | Dutch COVID-19 response team | Erasmus Medical Center                                          | Bas Oude Munnink et al | <a href="https://www.epicov.org/acknowledgement/42/52/EPI_ISL_904252.json">https://www.epicov.org/acknowledgement/42/52/EPI_ISL_904252.json</a>   |

| seq_id                      | gisaid_epi_isl  | originating_lab              | submitting_lab         | authors                | url                                                                                                                                               |
|-----------------------------|-----------------|------------------------------|------------------------|------------------------|---------------------------------------------------------------------------------------------------------------------------------------------------|
| Netherlands/LI-EMC-236/2020 | EPI_ISL_904250  | Dutch COVID-19 response team | Erasmus Medical Center | Bas Oude Munnink et al | <a href="https://www.epicov.org/acknowledgement/42/50/EPI_ISL_904250.json">https://www.epicov.org/acknowledgement/42/50/EPI_ISL_904250.json</a>   |
| Netherlands/LI-EMC-237/2020 | EPI_ISL_904445  | Dutch COVID-19 response team | Erasmus Medical Center | Bas Oude Munnink et al | <a href="https://www.epicov.org/acknowledgement/44/45/EPI_ISL_904445.json">https://www.epicov.org/acknowledgement/44/45/EPI_ISL_904445.json</a>   |
| Netherlands/LI-EMC-240/2020 | EPI_ISL_904426  | Dutch COVID-19 response team | Erasmus Medical Center | Bas Oude Munnink et al | <a href="https://www.epicov.org/acknowledgement/44/26/EPI_ISL_904426.json">https://www.epicov.org/acknowledgement/44/26/EPI_ISL_904426.json</a>   |
| Netherlands/LI-EMC-243/2020 | EPI_ISL_904239  | Dutch COVID-19 response team | Erasmus Medical Center | Bas Oude Munnink et al | <a href="https://www.epicov.org/acknowledgement/42/39/EPI_ISL_904239.json">https://www.epicov.org/acknowledgement/42/39/EPI_ISL_904239.json</a>   |
| Netherlands/LI-EMC-245/2020 | EPI_ISL_904281  | Dutch COVID-19 response team | Erasmus Medical Center | Bas Oude Munnink et al | <a href="https://www.epicov.org/acknowledgement/42/81/EPI_ISL_904281.json">https://www.epicov.org/acknowledgement/42/81/EPI_ISL_904281.json</a>   |
| Netherlands/LI-EMC-249/2020 | EPI_ISL_904433  | Dutch COVID-19 response team | Erasmus Medical Center | Bas Oude Munnink et al | <a href="https://www.epicov.org/acknowledgement/44/33/EPI_ISL_904433.json">https://www.epicov.org/acknowledgement/44/33/EPI_ISL_904433.json</a>   |
| Netherlands/LI-EMC-250/2020 | EPI_ISL_904171  | Dutch COVID-19 response team | Erasmus Medical Center | Bas Oude Munnink et al | <a href="https://www.epicov.org/acknowledgement/41/71/EPI_ISL_904171.json">https://www.epicov.org/acknowledgement/41/71/EPI_ISL_904171.json</a>   |
| Netherlands/LI-EMC-251/2020 | EPI_ISL_904455  | Dutch COVID-19 response team | Erasmus Medical Center | Bas Oude Munnink et al | <a href="https://www.epicov.org/acknowledgement/44/55/EPI_ISL_904455.json">https://www.epicov.org/acknowledgement/44/55/EPI_ISL_904455.json</a>   |
| Netherlands/LI-EMC-253/2020 | EPI_ISL_904456  | Dutch COVID-19 response team | Erasmus Medical Center | Bas Oude Munnink et al | <a href="https://www.epicov.org/acknowledgement/44/56/EPI_ISL_904456.json">https://www.epicov.org/acknowledgement/44/56/EPI_ISL_904456.json</a>   |
| Netherlands/LI-EMC-261/2020 | EPI_ISL_904253  | Dutch COVID-19 response team | Erasmus Medical Center | Bas Oude Munnink et al | <a href="https://www.epicov.org/acknowledgement/42/53/EPI_ISL_904253.json">https://www.epicov.org/acknowledgement/42/53/EPI_ISL_904253.json</a>   |
| Netherlands/LI-EMC-264/2020 | EPI_ISL_904441  | Dutch COVID-19 response team | Erasmus Medical Center | Bas Oude Munnink et al | <a href="https://www.epicov.org/acknowledgement/44/41/EPI_ISL_904441.json">https://www.epicov.org/acknowledgement/44/41/EPI_ISL_904441.json</a>   |
| Netherlands/LI-EMC-265/2020 | EPI_ISL_904448  | Dutch COVID-19 response team | Erasmus Medical Center | Bas Oude Munnink et al | <a href="https://www.epicov.org/acknowledgement/44/48/EPI_ISL_904448.json">https://www.epicov.org/acknowledgement/44/48/EPI_ISL_904448.json</a>   |
| Netherlands/LI-EMC-272/2020 | EPI_ISL_904454  | Dutch COVID-19 response team | Erasmus Medical Center | Bas Oude Munnink et al | <a href="https://www.epicov.org/acknowledgement/44/54/EPI_ISL_904454.json">https://www.epicov.org/acknowledgement/44/54/EPI_ISL_904454.json</a>   |
| Netherlands/LI-EMC-277/2020 | EPI_ISL_1311082 | Dutch COVID-19 response team | Erasmus Medical Center | Bas Oude Munnink et al | <a href="https://www.epicov.org/acknowledgement/10/82/EPI_ISL_1311082.json">https://www.epicov.org/acknowledgement/10/82/EPI_ISL_1311082.json</a> |
| Netherlands/LI-EMC-278/2020 | EPI_ISL_1311466 | Dutch COVID-19 response team | Erasmus Medical Center | Bas Oude Munnink et al | <a href="https://www.epicov.org/acknowledgement/14/66/EPI_ISL_1311466.json">https://www.epicov.org/acknowledgement/14/66/EPI_ISL_1311466.json</a> |
| Netherlands/LI-EMC-279/2020 | EPI_ISL_1311480 | Dutch COVID-19 response team | Erasmus Medical Center | Bas Oude Munnink et al | <a href="https://www.epicov.org/acknowledgement/14/80/EPI_ISL_1311480.json">https://www.epicov.org/acknowledgement/14/80/EPI_ISL_1311480.json</a> |
| Netherlands/LI-EMC-280/2020 | EPI_ISL_1311481 | Dutch COVID-19 response team | Erasmus Medical Center | Bas Oude Munnink et al | <a href="https://www.epicov.org/acknowledgement/14/81/EPI_ISL_1311481.json">https://www.epicov.org/acknowledgement/14/81/EPI_ISL_1311481.json</a> |
| Netherlands/LI-EMC-281/2020 | EPI_ISL_1311482 | Dutch COVID-19 response team | Erasmus Medical Center | Bas Oude Munnink et al | <a href="https://www.epicov.org/acknowledgement/14/82/EPI_ISL_1311482.json">https://www.epicov.org/acknowledgement/14/82/EPI_ISL_1311482.json</a> |
| Netherlands/LI-EMC-282/2020 | EPI_ISL_1311483 | Dutch COVID-19 response team | Erasmus Medical Center | Bas Oude Munnink et al | <a href="https://www.epicov.org/acknowledgement/14/83/EPI_ISL_1311483.json">https://www.epicov.org/acknowledgement/14/83/EPI_ISL_1311483.json</a> |
| Netherlands/LI-EMC-287/2020 | EPI_ISL_1311488 | Dutch COVID-19 response team | Erasmus Medical Center | Bas Oude Munnink et al | <a href="https://www.epicov.org/acknowledgement/14/88/EPI_ISL_1311488.json">https://www.epicov.org/acknowledgement/14/88/EPI_ISL_1311488.json</a> |
| Netherlands/LI-EMC-288/2020 | EPI_ISL_1311000 | Dutch COVID-19 response team | Erasmus Medical Center | Bas Oude Munnink et al | <a href="https://www.epicov.org/acknowledgement/10/00/EPI_ISL_1311000.json">https://www.epicov.org/acknowledgement/10/00/EPI_ISL_1311000.json</a> |
| Netherlands/LI-EMC-295/2020 | EPI_ISL_1310949 | Dutch COVID-19 response team | Erasmus Medical Center | Bas Oude Munnink et al | <a href="https://www.epicov.org/acknowledgement/09/49/EPI_ISL_1310949.json">https://www.epicov.org/acknowledgement/09/49/EPI_ISL_1310949.json</a> |
| Netherlands/LI-EMC-296/2020 | EPI_ISL_1311493 | Dutch COVID-19 response team | Erasmus Medical Center | Bas Oude Munnink et al | <a href="https://www.epicov.org/acknowledgement/14/93/EPI_ISL_1311493.json">https://www.epicov.org/acknowledgement/14/93/EPI_ISL_1311493.json</a> |
| Netherlands/LI-EMC-297/2020 | EPI_ISL_1311051 | Dutch COVID-19 response team | Erasmus Medical Center | Bas Oude Munnink et al | <a href="https://www.epicov.org/acknowledgement/10/51/EPI_ISL_1311051.json">https://www.epicov.org/acknowledgement/10/51/EPI_ISL_1311051.json</a> |
| Netherlands/LI-EMC-303/2020 | EPI_ISL_1311067 | Dutch COVID-19 response team | Erasmus Medical Center | Bas Oude Munnink et al | <a href="https://www.epicov.org/acknowledgement/10/67/EPI_ISL_1311067.json">https://www.epicov.org/acknowledgement/10/67/EPI_ISL_1311067.json</a> |



| seq_id                       | gisaid_epi_isl  | originating_lab              | submitting_lab                                             | authors                | url                                                                                                                                               |
|------------------------------|-----------------|------------------------------|------------------------------------------------------------|------------------------|---------------------------------------------------------------------------------------------------------------------------------------------------|
| Netherlands/LI-EMC-304/2020  | EPI_ISL_1311498 | Dutch COVID-19 response team | Erasmus Medical Center                                     | Bas Oude Munnink et al | <a href="https://www.epicov.org/acknowledgement/14/98/EPI_ISL_1311498.json">https://www.epicov.org/acknowledgement/14/98/EPI_ISL_1311498.json</a> |
| Netherlands/LI-EMC-313/2020  | EPI_ISL_1311506 | Dutch COVID-19 response team | Erasmus Medical Center                                     | Bas Oude Munnink et al | <a href="https://www.epicov.org/acknowledgement/15/06/EPI_ISL_1311506.json">https://www.epicov.org/acknowledgement/15/06/EPI_ISL_1311506.json</a> |
| Netherlands/LI-EMC-318/2020  | EPI_ISL_1311060 | Dutch COVID-19 response team | Erasmus Medical Center                                     | Bas Oude Munnink et al | <a href="https://www.epicov.org/acknowledgement/10/60/EPI_ISL_1311060.json">https://www.epicov.org/acknowledgement/10/60/EPI_ISL_1311060.json</a> |
| Netherlands/LI-EMC-327/2020  | EPI_ISL_1311513 | Dutch COVID-19 response team | Erasmus Medical Center                                     | Bas Oude Munnink et al | <a href="https://www.epicov.org/acknowledgement/15/13/EPI_ISL_1311513.json">https://www.epicov.org/acknowledgement/15/13/EPI_ISL_1311513.json</a> |
| Netherlands/LI-EMC-328/2020  | EPI_ISL_1310884 | Dutch COVID-19 response team | Erasmus Medical Center                                     | Bas Oude Munnink et al | <a href="https://www.epicov.org/acknowledgement/08/84/EPI_ISL_1310884.json">https://www.epicov.org/acknowledgement/08/84/EPI_ISL_1310884.json</a> |
| Netherlands/LI-EMC-332/2020  | EPI_ISL_1311515 | Dutch COVID-19 response team | Erasmus Medical Center                                     | Bas Oude Munnink et al | <a href="https://www.epicov.org/acknowledgement/15/15/EPI_ISL_1311515.json">https://www.epicov.org/acknowledgement/15/15/EPI_ISL_1311515.json</a> |
| Netherlands/LI-EMC-334/2020  | EPI_ISL_1311535 | Dutch COVID-19 response team | Erasmus Medical Center                                     | Bas Oude Munnink et al | <a href="https://www.epicov.org/acknowledgement/15/35/EPI_ISL_1311535.json">https://www.epicov.org/acknowledgement/15/35/EPI_ISL_1311535.json</a> |
| Netherlands/LI-EMC-76/2020   | EPI_ISL_523281  | Dutch COVID-19 response team | Erasmus Medical Center                                     | Bas Oude Munnink et al | <a href="https://www.epicov.org/acknowledgement/32/81/EPI_ISL_523281.json">https://www.epicov.org/acknowledgement/32/81/EPI_ISL_523281.json</a>   |
| Netherlands/LI-EMC-78/2020   | EPI_ISL_523283  | Dutch COVID-19 response team | Erasmus Medical Center                                     | Bas Oude Munnink et al | <a href="https://www.epicov.org/acknowledgement/32/83/EPI_ISL_523283.json">https://www.epicov.org/acknowledgement/32/83/EPI_ISL_523283.json</a>   |
| Netherlands/LI-EMC-80/2020   | EPI_ISL_523285  | Dutch COVID-19 response team | Erasmus Medical Center                                     | Bas Oude Munnink et al | <a href="https://www.epicov.org/acknowledgement/32/85/EPI_ISL_523285.json">https://www.epicov.org/acknowledgement/32/85/EPI_ISL_523285.json</a>   |
| Netherlands/LI-EMC-89/2020   | EPI_ISL_577835  | Dutch COVID-19 response team | Erasmus Medical Center                                     | Bas Oude Munnink et al | <a href="https://www.epicov.org/acknowledgement/78/35/EPI_ISL_577835.json">https://www.epicov.org/acknowledgement/78/35/EPI_ISL_577835.json</a>   |
| Netherlands/LI-EMC-90/2020   | EPI_ISL_577836  | Dutch COVID-19 response team | Erasmus Medical Center                                     | Bas Oude Munnink et al | <a href="https://www.epicov.org/acknowledgement/78/36/EPI_ISL_577836.json">https://www.epicov.org/acknowledgement/78/36/EPI_ISL_577836.json</a>   |
| Netherlands/LI-EMC-96/2020   | EPI_ISL_632402  | Dutch COVID-19 response team | Erasmus Medical Center                                     | Bas Oude Munnink et al | <a href="https://www.epicov.org/acknowledgement/24/02/EPI_ISL_632402.json">https://www.epicov.org/acknowledgement/24/02/EPI_ISL_632402.json</a>   |
| Netherlands/LI-MUMC-166/2020 | EPI_ISL_965734  | Dutch COVID-19 response team | Medical Microbiology, Maastricht University Medical Centre | Jozef Dingemans* et al | <a href="https://www.epicov.org/acknowledgement/57/34/EPI_ISL_965734.json">https://www.epicov.org/acknowledgement/57/34/EPI_ISL_965734.json</a>   |
| Netherlands/LI-MUMC-168/2020 | EPI_ISL_965654  | Dutch COVID-19 response team | Medical Microbiology, Maastricht University Medical Centre | Jozef Dingemans* et al | <a href="https://www.epicov.org/acknowledgement/56/54/EPI_ISL_965654.json">https://www.epicov.org/acknowledgement/56/54/EPI_ISL_965654.json</a>   |
| Netherlands/LI-MUMC-173/2020 | EPI_ISL_1120545 | Dutch COVID-19 response team | Medical Microbiology, Maastricht University Medical Centre | Jozef Dingemans* et al | <a href="https://www.epicov.org/acknowledgement/05/45/EPI_ISL_1120545.json">https://www.epicov.org/acknowledgement/05/45/EPI_ISL_1120545.json</a> |
| Netherlands/LI-MUMC-40/2020  | EPI_ISL_965719  | Dutch COVID-19 response team | Medical Microbiology, Maastricht University Medical Centre | Jozef Dingemans* et al | <a href="https://www.epicov.org/acknowledgement/57/19/EPI_ISL_965719.json">https://www.epicov.org/acknowledgement/57/19/EPI_ISL_965719.json</a>   |
| Netherlands/LI-MUMC-44/2020  | EPI_ISL_965546  | Dutch COVID-19 response team | Medical Microbiology, Maastricht University Medical Centre | Jozef Dingemans* et al | <a href="https://www.epicov.org/acknowledgement/55/46/EPI_ISL_965546.json">https://www.epicov.org/acknowledgement/55/46/EPI_ISL_965546.json</a>   |
| Netherlands/LI-MUMC-682/2020 | EPI_ISL_1120482 | Dutch COVID-19 response team | Medical Microbiology, Maastricht University Medical Centre | Jozef Dingemans* et al | <a href="https://www.epicov.org/acknowledgement/04/82/EPI_ISL_1120482.json">https://www.epicov.org/acknowledgement/04/82/EPI_ISL_1120482.json</a> |
| Netherlands/LI-MUMC-683/2020 | EPI_ISL_1120275 | Dutch COVID-19 response team | Medical Microbiology, Maastricht University Medical Centre | Jozef Dingemans* et al | <a href="https://www.epicov.org/acknowledgement/02/75/EPI_ISL_1120275.json">https://www.epicov.org/acknowledgement/02/75/EPI_ISL_1120275.json</a> |
| Netherlands/LI-MUMC-82/2020  | EPI_ISL_1120208 | Dutch COVID-19 response team | Medical Microbiology, Maastricht University Medical Centre | Jozef Dingemans* et al | <a href="https://www.epicov.org/acknowledgement/02/08/EPI_ISL_1120208.json">https://www.epicov.org/acknowledgement/02/08/EPI_ISL_1120208.json</a> |
| Netherlands/LI-MUMC-85/2020  | EPI_ISL_965578  | Dutch COVID-19 response team | Medical Microbiology, Maastricht University Medical Centre | Jozef Dingemans* et al | <a href="https://www.epicov.org/acknowledgement/55/78/EPI_ISL_965578.json">https://www.epicov.org/acknowledgement/55/78/EPI_ISL_965578.json</a>   |
| Netherlands/LI-MUMC-933/2020 | EPI_ISL_1158747 | Dutch COVID-19 response team | Medical Microbiology, Maastricht University Medical Centre | Jozef Dingemans* et al | <a href="https://www.epicov.org/acknowledgement/87/47/EPI_ISL_1158747.json">https://www.epicov.org/acknowledgement/87/47/EPI_ISL_1158747.json</a> |
| Netherlands/Limburg_12/2020  | EPI_ISL_461000  | Dutch COVID-19 response team | Erasmus Medical Center                                     | Bas Oude Munnink et al | <a href="https://www.epicov.org/acknowledgement/10/00/EPI_ISL_461000.json">https://www.epicov.org/acknowledgement/10/00/EPI_ISL_461000.json</a>   |
| Netherlands/Limburg_16/2020  | EPI_ISL_461004  | Dutch COVID-19 response team | Erasmus Medical Center                                     | Bas Oude Munnink et al | <a href="https://www.epicov.org/acknowledgement/10/04/EPI_ISL_461004.json">https://www.epicov.org/acknowledgement/10/04/EPI_ISL_461004.json</a>   |

| seq_id                      | gisaid_epi_isl | originating_lab              | submitting_lab         | authors                | url                                                                                                                                             |
|-----------------------------|----------------|------------------------------|------------------------|------------------------|-------------------------------------------------------------------------------------------------------------------------------------------------|
| Netherlands/Limburg_17/2020 | EPI_ISL_461005 | Dutch COVID-19 response team | Erasmus Medical Center | Bas Oude Munnink et al | <a href="https://www.epicov.org/acknowledgement/10/05/EPI_ISL_461005.json">https://www.epicov.org/acknowledgement/10/05/EPI_ISL_461005.json</a> |
| Netherlands/NA_649/2020     | EPI_ISL_461084 | Dutch COVID-19 response team | Erasmus Medical Center | Bas Oude Munnink et al | <a href="https://www.epicov.org/acknowledgement/10/84/EPI_ISL_461084.json">https://www.epicov.org/acknowledgement/10/84/EPI_ISL_461084.json</a> |
| Netherlands/NB-EMC-178/2020 | EPI_ISL_523301 | Dutch COVID-19 response team | Erasmus Medical Center | Bas Oude Munnink et al | <a href="https://www.epicov.org/acknowledgement/33/01/EPI_ISL_523301.json">https://www.epicov.org/acknowledgement/33/01/EPI_ISL_523301.json</a> |
| Netherlands/NB-EMC-180/2020 | EPI_ISL_523303 | Dutch COVID-19 response team | Erasmus Medical Center | Bas Oude Munnink et al | <a href="https://www.epicov.org/acknowledgement/33/03/EPI_ISL_523303.json">https://www.epicov.org/acknowledgement/33/03/EPI_ISL_523303.json</a> |
| Netherlands/NB-EMC-183/2020 | EPI_ISL_523306 | Dutch COVID-19 response team | Erasmus Medical Center | Bas Oude Munnink et al | <a href="https://www.epicov.org/acknowledgement/33/06/EPI_ISL_523306.json">https://www.epicov.org/acknowledgement/33/06/EPI_ISL_523306.json</a> |
| Netherlands/NB-EMC-184/2020 | EPI_ISL_523307 | Dutch COVID-19 response team | Erasmus Medical Center | Bas Oude Munnink et al | <a href="https://www.epicov.org/acknowledgement/33/07/EPI_ISL_523307.json">https://www.epicov.org/acknowledgement/33/07/EPI_ISL_523307.json</a> |
| Netherlands/NB-EMC-185/2020 | EPI_ISL_523308 | Dutch COVID-19 response team | Erasmus Medical Center | Bas Oude Munnink et al | <a href="https://www.epicov.org/acknowledgement/33/08/EPI_ISL_523308.json">https://www.epicov.org/acknowledgement/33/08/EPI_ISL_523308.json</a> |
| Netherlands/NB-EMC-211/2020 | EPI_ISL_523334 | Dutch COVID-19 response team | Erasmus Medical Center | Bas Oude Munnink et al | <a href="https://www.epicov.org/acknowledgement/33/34/EPI_ISL_523334.json">https://www.epicov.org/acknowledgement/33/34/EPI_ISL_523334.json</a> |
| Netherlands/NB-EMC-212/2020 | EPI_ISL_523335 | Dutch COVID-19 response team | Erasmus Medical Center | Bas Oude Munnink et al | <a href="https://www.epicov.org/acknowledgement/33/35/EPI_ISL_523335.json">https://www.epicov.org/acknowledgement/33/35/EPI_ISL_523335.json</a> |
| Netherlands/NB-EMC-215/2020 | EPI_ISL_523338 | Dutch COVID-19 response team | Erasmus Medical Center | Bas Oude Munnink et al | <a href="https://www.epicov.org/acknowledgement/33/38/EPI_ISL_523338.json">https://www.epicov.org/acknowledgement/33/38/EPI_ISL_523338.json</a> |
| Netherlands/NB-EMC-217/2020 | EPI_ISL_523340 | Dutch COVID-19 response team | Erasmus Medical Center | Bas Oude Munnink et al | <a href="https://www.epicov.org/acknowledgement/33/40/EPI_ISL_523340.json">https://www.epicov.org/acknowledgement/33/40/EPI_ISL_523340.json</a> |
| Netherlands/NB-EMC-218/2020 | EPI_ISL_523341 | Dutch COVID-19 response team | Erasmus Medical Center | Bas Oude Munnink et al | <a href="https://www.epicov.org/acknowledgement/33/41/EPI_ISL_523341.json">https://www.epicov.org/acknowledgement/33/41/EPI_ISL_523341.json</a> |
| Netherlands/NB-EMC-219/2020 | EPI_ISL_523342 | Dutch COVID-19 response team | Erasmus Medical Center | Bas Oude Munnink et al | <a href="https://www.epicov.org/acknowledgement/33/42/EPI_ISL_523342.json">https://www.epicov.org/acknowledgement/33/42/EPI_ISL_523342.json</a> |
| Netherlands/NB-EMC-221/2020 | EPI_ISL_523344 | Dutch COVID-19 response team | Erasmus Medical Center | Bas Oude Munnink et al | <a href="https://www.epicov.org/acknowledgement/33/44/EPI_ISL_523344.json">https://www.epicov.org/acknowledgement/33/44/EPI_ISL_523344.json</a> |
| Netherlands/NB-EMC-222/2020 | EPI_ISL_523345 | Dutch COVID-19 response team | Erasmus Medical Center | Bas Oude Munnink et al | <a href="https://www.epicov.org/acknowledgement/33/45/EPI_ISL_523345.json">https://www.epicov.org/acknowledgement/33/45/EPI_ISL_523345.json</a> |
| Netherlands/NB-EMC-224/2020 | EPI_ISL_523347 | Dutch COVID-19 response team | Erasmus Medical Center | Bas Oude Munnink et al | <a href="https://www.epicov.org/acknowledgement/33/47/EPI_ISL_523347.json">https://www.epicov.org/acknowledgement/33/47/EPI_ISL_523347.json</a> |
| Netherlands/NB-EMC-226/2020 | EPI_ISL_523349 | Dutch COVID-19 response team | Erasmus Medical Center | Bas Oude Munnink et al | <a href="https://www.epicov.org/acknowledgement/33/49/EPI_ISL_523349.json">https://www.epicov.org/acknowledgement/33/49/EPI_ISL_523349.json</a> |
| Netherlands/NB-EMC-227/2020 | EPI_ISL_523350 | Dutch COVID-19 response team | Erasmus Medical Center | Bas Oude Munnink et al | <a href="https://www.epicov.org/acknowledgement/33/50/EPI_ISL_523350.json">https://www.epicov.org/acknowledgement/33/50/EPI_ISL_523350.json</a> |
| Netherlands/NB-EMC-234/2020 | EPI_ISL_523357 | Dutch COVID-19 response team | Erasmus Medical Center | Bas Oude Munnink et al | <a href="https://www.epicov.org/acknowledgement/33/57/EPI_ISL_523357.json">https://www.epicov.org/acknowledgement/33/57/EPI_ISL_523357.json</a> |
| Netherlands/NB-EMC-236/2020 | EPI_ISL_523359 | Dutch COVID-19 response team | Erasmus Medical Center | Bas Oude Munnink et al | <a href="https://www.epicov.org/acknowledgement/33/59/EPI_ISL_523359.json">https://www.epicov.org/acknowledgement/33/59/EPI_ISL_523359.json</a> |
| Netherlands/NB-EMC-240/2020 | EPI_ISL_523363 | Dutch COVID-19 response team | Erasmus Medical Center | Bas Oude Munnink et al | <a href="https://www.epicov.org/acknowledgement/33/63/EPI_ISL_523363.json">https://www.epicov.org/acknowledgement/33/63/EPI_ISL_523363.json</a> |
| Netherlands/NB-EMC-241/2020 | EPI_ISL_523364 | Dutch COVID-19 response team | Erasmus Medical Center | Bas Oude Munnink et al | <a href="https://www.epicov.org/acknowledgement/33/64/EPI_ISL_523364.json">https://www.epicov.org/acknowledgement/33/64/EPI_ISL_523364.json</a> |
| Netherlands/NB-EMC-245/2020 | EPI_ISL_523368 | Dutch COVID-19 response team | Erasmus Medical Center | Bas Oude Munnink et al | <a href="https://www.epicov.org/acknowledgement/33/68/EPI_ISL_523368.json">https://www.epicov.org/acknowledgement/33/68/EPI_ISL_523368.json</a> |
| Netherlands/NB-EMC-248/2020 | EPI_ISL_523371 | Dutch COVID-19 response team | Erasmus Medical Center | Bas Oude Munnink et al | <a href="https://www.epicov.org/acknowledgement/33/71/EPI_ISL_523371.json">https://www.epicov.org/acknowledgement/33/71/EPI_ISL_523371.json</a> |
| Netherlands/NB-EMC-253/2020 | EPI_ISL_523376 | Dutch COVID-19 response team | Erasmus Medical Center | Bas Oude Munnink et al | <a href="https://www.epicov.org/acknowledgement/33/76/EPI_ISL_523376.json">https://www.epicov.org/acknowledgement/33/76/EPI_ISL_523376.json</a> |

| seq_id                      | gisaid_epi_isl | originating_lab              | submitting_lab         | authors                | url                                                                                                                                             |
|-----------------------------|----------------|------------------------------|------------------------|------------------------|-------------------------------------------------------------------------------------------------------------------------------------------------|
| Netherlands/NB-EMC-258/2020 | EPI_ISL_523381 | Dutch COVID-19 response team | Erasmus Medical Center | Bas Oude Munnink et al | <a href="https://www.epicov.org/acknowledgement/33/81/EPI_ISL_523381.json">https://www.epicov.org/acknowledgement/33/81/EPI_ISL_523381.json</a> |
| Netherlands/NB-EMC-261/2020 | EPI_ISL_523384 | Dutch COVID-19 response team | Erasmus Medical Center | Bas Oude Munnink et al | <a href="https://www.epicov.org/acknowledgement/33/84/EPI_ISL_523384.json">https://www.epicov.org/acknowledgement/33/84/EPI_ISL_523384.json</a> |
| Netherlands/NB-EMC-281/2020 | EPI_ISL_523403 | Dutch COVID-19 response team | Erasmus Medical Center | Bas Oude Munnink et al | <a href="https://www.epicov.org/acknowledgement/34/03/EPI_ISL_523403.json">https://www.epicov.org/acknowledgement/34/03/EPI_ISL_523403.json</a> |
| Netherlands/NB-EMC-282/2020 | EPI_ISL_523404 | Dutch COVID-19 response team | Erasmus Medical Center | Bas Oude Munnink et al | <a href="https://www.epicov.org/acknowledgement/34/04/EPI_ISL_523404.json">https://www.epicov.org/acknowledgement/34/04/EPI_ISL_523404.json</a> |
| Netherlands/NB-EMC-292/2020 | EPI_ISL_577841 | Dutch COVID-19 response team | Erasmus Medical Center | Bas Oude Munnink et al | <a href="https://www.epicov.org/acknowledgement/78/41/EPI_ISL_577841.json">https://www.epicov.org/acknowledgement/78/41/EPI_ISL_577841.json</a> |
| Netherlands/NB-EMC-293/2020 | EPI_ISL_577842 | Dutch COVID-19 response team | Erasmus Medical Center | Bas Oude Munnink et al | <a href="https://www.epicov.org/acknowledgement/78/42/EPI_ISL_577842.json">https://www.epicov.org/acknowledgement/78/42/EPI_ISL_577842.json</a> |
| Netherlands/NB-EMC-295/2020 | EPI_ISL_577844 | Dutch COVID-19 response team | Erasmus Medical Center | Bas Oude Munnink et al | <a href="https://www.epicov.org/acknowledgement/78/44/EPI_ISL_577844.json">https://www.epicov.org/acknowledgement/78/44/EPI_ISL_577844.json</a> |
| Netherlands/NB-EMC-300/2020 | EPI_ISL_632535 | Dutch COVID-19 response team | Erasmus Medical Center | Bas Oude Munnink et al | <a href="https://www.epicov.org/acknowledgement/25/35/EPI_ISL_632535.json">https://www.epicov.org/acknowledgement/25/35/EPI_ISL_632535.json</a> |
| Netherlands/NB-EMC-303/2020 | EPI_ISL_632329 | Dutch COVID-19 response team | Erasmus Medical Center | Bas Oude Munnink et al | <a href="https://www.epicov.org/acknowledgement/23/29/EPI_ISL_632329.json">https://www.epicov.org/acknowledgement/23/29/EPI_ISL_632329.json</a> |
| Netherlands/NB-EMC-307/2020 | EPI_ISL_632660 | Dutch COVID-19 response team | Erasmus Medical Center | Bas Oude Munnink et al | <a href="https://www.epicov.org/acknowledgement/26/60/EPI_ISL_632660.json">https://www.epicov.org/acknowledgement/26/60/EPI_ISL_632660.json</a> |
| Netherlands/NB-EMC-308/2020 | EPI_ISL_632661 | Dutch COVID-19 response team | Erasmus Medical Center | Bas Oude Munnink et al | <a href="https://www.epicov.org/acknowledgement/26/61/EPI_ISL_632661.json">https://www.epicov.org/acknowledgement/26/61/EPI_ISL_632661.json</a> |
| Netherlands/NB-EMC-309/2020 | EPI_ISL_632662 | Dutch COVID-19 response team | Erasmus Medical Center | Bas Oude Munnink et al | <a href="https://www.epicov.org/acknowledgement/26/62/EPI_ISL_632662.json">https://www.epicov.org/acknowledgement/26/62/EPI_ISL_632662.json</a> |
| Netherlands/NB-EMC-313/2020 | EPI_ISL_632446 | Dutch COVID-19 response team | Erasmus Medical Center | Bas Oude Munnink et al | <a href="https://www.epicov.org/acknowledgement/24/46/EPI_ISL_632446.json">https://www.epicov.org/acknowledgement/24/46/EPI_ISL_632446.json</a> |
| Netherlands/NB-EMC-315/2020 | EPI_ISL_632667 | Dutch COVID-19 response team | Erasmus Medical Center | Bas Oude Munnink et al | <a href="https://www.epicov.org/acknowledgement/26/67/EPI_ISL_632667.json">https://www.epicov.org/acknowledgement/26/67/EPI_ISL_632667.json</a> |
| Netherlands/NB-EMC-319/2020 | EPI_ISL_632772 | Dutch COVID-19 response team | Erasmus Medical Center | Bas Oude Munnink et al | <a href="https://www.epicov.org/acknowledgement/27/72/EPI_ISL_632772.json">https://www.epicov.org/acknowledgement/27/72/EPI_ISL_632772.json</a> |
| Netherlands/NB-EMC-320/2020 | EPI_ISL_632773 | Dutch COVID-19 response team | Erasmus Medical Center | Bas Oude Munnink et al | <a href="https://www.epicov.org/acknowledgement/27/73/EPI_ISL_632773.json">https://www.epicov.org/acknowledgement/27/73/EPI_ISL_632773.json</a> |
| Netherlands/NB-EMC-328/2020 | EPI_ISL_632609 | Dutch COVID-19 response team | Erasmus Medical Center | Bas Oude Munnink et al | <a href="https://www.epicov.org/acknowledgement/26/09/EPI_ISL_632609.json">https://www.epicov.org/acknowledgement/26/09/EPI_ISL_632609.json</a> |
| Netherlands/NB-EMC-345/2020 | EPI_ISL_722525 | Dutch COVID-19 response team | Erasmus Medical Center | Bas Oude Munnink et al | <a href="https://www.epicov.org/acknowledgement/25/25/EPI_ISL_722525.json">https://www.epicov.org/acknowledgement/25/25/EPI_ISL_722525.json</a> |
| Netherlands/NB-EMC-346/2020 | EPI_ISL_722526 | Dutch COVID-19 response team | Erasmus Medical Center | Bas Oude Munnink et al | <a href="https://www.epicov.org/acknowledgement/25/26/EPI_ISL_722526.json">https://www.epicov.org/acknowledgement/25/26/EPI_ISL_722526.json</a> |
| Netherlands/NB-EMC-367/2020 | EPI_ISL_722274 | Dutch COVID-19 response team | Erasmus Medical Center | Bas Oude Munnink et al | <a href="https://www.epicov.org/acknowledgement/22/74/EPI_ISL_722274.json">https://www.epicov.org/acknowledgement/22/74/EPI_ISL_722274.json</a> |
| Netherlands/NB-EMC-373/2020 | EPI_ISL_722278 | Dutch COVID-19 response team | Erasmus Medical Center | Bas Oude Munnink et al | <a href="https://www.epicov.org/acknowledgement/22/78/EPI_ISL_722278.json">https://www.epicov.org/acknowledgement/22/78/EPI_ISL_722278.json</a> |
| Netherlands/NB-EMC-378/2020 | EPI_ISL_722827 | Dutch COVID-19 response team | Erasmus Medical Center | Bas Oude Munnink et al | <a href="https://www.epicov.org/acknowledgement/28/27/EPI_ISL_722827.json">https://www.epicov.org/acknowledgement/28/27/EPI_ISL_722827.json</a> |
| Netherlands/NB-EMC-379/2020 | EPI_ISL_722829 | Dutch COVID-19 response team | Erasmus Medical Center | Bas Oude Munnink et al | <a href="https://www.epicov.org/acknowledgement/28/29/EPI_ISL_722829.json">https://www.epicov.org/acknowledgement/28/29/EPI_ISL_722829.json</a> |
| Netherlands/NB-EMC-380/2020 | EPI_ISL_722834 | Dutch COVID-19 response team | Erasmus Medical Center | Bas Oude Munnink et al | <a href="https://www.epicov.org/acknowledgement/28/34/EPI_ISL_722834.json">https://www.epicov.org/acknowledgement/28/34/EPI_ISL_722834.json</a> |
| Netherlands/NB-EMC-381/2020 | EPI_ISL_722835 | Dutch COVID-19 response team | Erasmus Medical Center | Bas Oude Munnink et al | <a href="https://www.epicov.org/acknowledgement/28/35/EPI_ISL_722835.json">https://www.epicov.org/acknowledgement/28/35/EPI_ISL_722835.json</a> |

| seq_id                      | gisaid_epi_isl  | originating_lab              | submitting_lab         | authors                | url                                                                                                                                               |
|-----------------------------|-----------------|------------------------------|------------------------|------------------------|---------------------------------------------------------------------------------------------------------------------------------------------------|
| Netherlands/NB-EMC-383/2020 | EPI_ISL_722841  | Dutch COVID-19 response team | Erasmus Medical Center | Bas Oude Munnink et al | <a href="https://www.epicov.org/acknowledgement/28/41/EPI_ISL_722841.json">https://www.epicov.org/acknowledgement/28/41/EPI_ISL_722841.json</a>   |
| Netherlands/NB-EMC-386/2020 | EPI_ISL_722353  | Dutch COVID-19 response team | Erasmus Medical Center | Bas Oude Munnink et al | <a href="https://www.epicov.org/acknowledgement/23/53/EPI_ISL_722353.json">https://www.epicov.org/acknowledgement/23/53/EPI_ISL_722353.json</a>   |
| Netherlands/NB-EMC-387/2020 | EPI_ISL_722592  | Dutch COVID-19 response team | Erasmus Medical Center | Bas Oude Munnink et al | <a href="https://www.epicov.org/acknowledgement/25/92/EPI_ISL_722592.json">https://www.epicov.org/acknowledgement/25/92/EPI_ISL_722592.json</a>   |
| Netherlands/NB-EMC-452/2020 | EPI_ISL_722802  | Dutch COVID-19 response team | Erasmus Medical Center | Bas Oude Munnink et al | <a href="https://www.epicov.org/acknowledgement/28/02/EPI_ISL_722802.json">https://www.epicov.org/acknowledgement/28/02/EPI_ISL_722802.json</a>   |
| Netherlands/NB-EMC-454/2020 | EPI_ISL_722803  | Dutch COVID-19 response team | Erasmus Medical Center | Bas Oude Munnink et al | <a href="https://www.epicov.org/acknowledgement/28/03/EPI_ISL_722803.json">https://www.epicov.org/acknowledgement/28/03/EPI_ISL_722803.json</a>   |
| Netherlands/NB-EMC-456/2020 | EPI_ISL_722805  | Dutch COVID-19 response team | Erasmus Medical Center | Bas Oude Munnink et al | <a href="https://www.epicov.org/acknowledgement/28/05/EPI_ISL_722805.json">https://www.epicov.org/acknowledgement/28/05/EPI_ISL_722805.json</a>   |
| Netherlands/NB-EMC-462/2020 | EPI_ISL_722354  | Dutch COVID-19 response team | Erasmus Medical Center | Bas Oude Munnink et al | <a href="https://www.epicov.org/acknowledgement/23/54/EPI_ISL_722354.json">https://www.epicov.org/acknowledgement/23/54/EPI_ISL_722354.json</a>   |
| Netherlands/NB-EMC-463/2020 | EPI_ISL_722810  | Dutch COVID-19 response team | Erasmus Medical Center | Bas Oude Munnink et al | <a href="https://www.epicov.org/acknowledgement/28/10/EPI_ISL_722810.json">https://www.epicov.org/acknowledgement/28/10/EPI_ISL_722810.json</a>   |
| Netherlands/NB-EMC-471/2020 | EPI_ISL_722529  | Dutch COVID-19 response team | Erasmus Medical Center | Bas Oude Munnink et al | <a href="https://www.epicov.org/acknowledgement/25/29/EPI_ISL_722529.json">https://www.epicov.org/acknowledgement/25/29/EPI_ISL_722529.json</a>   |
| Netherlands/NB-EMC-480/2020 | EPI_ISL_763139  | Dutch COVID-19 response team | Erasmus Medical Center | Bas Oude Munnink et al | <a href="https://www.epicov.org/acknowledgement/31/39/EPI_ISL_763139.json">https://www.epicov.org/acknowledgement/31/39/EPI_ISL_763139.json</a>   |
| Netherlands/NB-EMC-482/2020 | EPI_ISL_763141  | Dutch COVID-19 response team | Erasmus Medical Center | Bas Oude Munnink et al | <a href="https://www.epicov.org/acknowledgement/31/41/EPI_ISL_763141.json">https://www.epicov.org/acknowledgement/31/41/EPI_ISL_763141.json</a>   |
| Netherlands/NB-EMC-483/2020 | EPI_ISL_763142  | Dutch COVID-19 response team | Erasmus Medical Center | Bas Oude Munnink et al | <a href="https://www.epicov.org/acknowledgement/31/42/EPI_ISL_763142.json">https://www.epicov.org/acknowledgement/31/42/EPI_ISL_763142.json</a>   |
| Netherlands/NB-EMC-487/2020 | EPI_ISL_763146  | Dutch COVID-19 response team | Erasmus Medical Center | Bas Oude Munnink et al | <a href="https://www.epicov.org/acknowledgement/31/46/EPI_ISL_763146.json">https://www.epicov.org/acknowledgement/31/46/EPI_ISL_763146.json</a>   |
| Netherlands/NB-EMC-488/2020 | EPI_ISL_763147  | Dutch COVID-19 response team | Erasmus Medical Center | Bas Oude Munnink et al | <a href="https://www.epicov.org/acknowledgement/31/47/EPI_ISL_763147.json">https://www.epicov.org/acknowledgement/31/47/EPI_ISL_763147.json</a>   |
| Netherlands/NB-EMC-489/2020 | EPI_ISL_763148  | Dutch COVID-19 response team | Erasmus Medical Center | Bas Oude Munnink et al | <a href="https://www.epicov.org/acknowledgement/31/48/EPI_ISL_763148.json">https://www.epicov.org/acknowledgement/31/48/EPI_ISL_763148.json</a>   |
| Netherlands/NB-EMC-593/2020 | EPI_ISL_904442  | Dutch COVID-19 response team | Erasmus Medical Center | Bas Oude Munnink et al | <a href="https://www.epicov.org/acknowledgement/44/42/EPI_ISL_904442.json">https://www.epicov.org/acknowledgement/44/42/EPI_ISL_904442.json</a>   |
| Netherlands/NB-EMC-596/2020 | EPI_ISL_904432  | Dutch COVID-19 response team | Erasmus Medical Center | Bas Oude Munnink et al | <a href="https://www.epicov.org/acknowledgement/44/32/EPI_ISL_904432.json">https://www.epicov.org/acknowledgement/44/32/EPI_ISL_904432.json</a>   |
| Netherlands/NB-EMC-661/2020 | EPI_ISL_1311516 | Dutch COVID-19 response team | Erasmus Medical Center | Bas Oude Munnink et al | <a href="https://www.epicov.org/acknowledgement/15/16/EPI_ISL_1311516.json">https://www.epicov.org/acknowledgement/15/16/EPI_ISL_1311516.json</a> |
| Netherlands/NB-EMC-665/2020 | EPI_ISL_1311055 | Dutch COVID-19 response team | Erasmus Medical Center | Bas Oude Munnink et al | <a href="https://www.epicov.org/acknowledgement/10/55/EPI_ISL_1311055.json">https://www.epicov.org/acknowledgement/10/55/EPI_ISL_1311055.json</a> |
| Netherlands/NB-EMC-678/2020 | EPI_ISL_1310977 | Dutch COVID-19 response team | Erasmus Medical Center | Bas Oude Munnink et al | <a href="https://www.epicov.org/acknowledgement/09/77/EPI_ISL_1310977.json">https://www.epicov.org/acknowledgement/09/77/EPI_ISL_1310977.json</a> |
| Netherlands/NB-EMC-732/2020 | EPI_ISL_1311221 | Dutch COVID-19 response team | Erasmus Medical Center | Bas Oude Munnink et al | <a href="https://www.epicov.org/acknowledgement/12/21/EPI_ISL_1311221.json">https://www.epicov.org/acknowledgement/12/21/EPI_ISL_1311221.json</a> |
| Netherlands/NB-EMC-736/2020 | EPI_ISL_1310848 | Dutch COVID-19 response team | Erasmus Medical Center | Bas Oude Munnink et al | <a href="https://www.epicov.org/acknowledgement/08/48/EPI_ISL_1310848.json">https://www.epicov.org/acknowledgement/08/48/EPI_ISL_1310848.json</a> |
| Netherlands/NB-EMC-740/2020 | EPI_ISL_1311261 | Dutch COVID-19 response team | Erasmus Medical Center | Bas Oude Munnink et al | <a href="https://www.epicov.org/acknowledgement/12/61/EPI_ISL_1311261.json">https://www.epicov.org/acknowledgement/12/61/EPI_ISL_1311261.json</a> |
| Netherlands/NB-EMC-741/2020 | EPI_ISL_1310874 | Dutch COVID-19 response team | Erasmus Medical Center | Bas Oude Munnink et al | <a href="https://www.epicov.org/acknowledgement/08/74/EPI_ISL_1310874.json">https://www.epicov.org/acknowledgement/08/74/EPI_ISL_1310874.json</a> |
| Netherlands/NB-EMC-746/2020 | EPI_ISL_1310913 | Dutch COVID-19 response team | Erasmus Medical Center | Bas Oude Munnink et al | <a href="https://www.epicov.org/acknowledgement/09/13/EPI_ISL_1310913.json">https://www.epicov.org/acknowledgement/09/13/EPI_ISL_1310913.json</a> |

| seq_id                              | gisaid_epi_isl  | originating_lab              | submitting_lab                                             | authors                | url                                                                                                                                               |
|-------------------------------------|-----------------|------------------------------|------------------------------------------------------------|------------------------|---------------------------------------------------------------------------------------------------------------------------------------------------|
| Netherlands/NB-EMC-754/2020         | EPI_ISL_1311034 | Dutch COVID-19 response team | Erasmus Medical Center                                     | Bas Oude Munnink et al | <a href="https://www.epicov.org/acknowledgement/10/34/EPI_ISL_1311034.json">https://www.epicov.org/acknowledgement/10/34/EPI_ISL_1311034.json</a> |
| Netherlands/NB-EMC-757/2020         | EPI_ISL_1311683 | Dutch COVID-19 response team | Erasmus Medical Center                                     | Bas Oude Munnink et al | <a href="https://www.epicov.org/acknowledgement/16/83/EPI_ISL_1311683.json">https://www.epicov.org/acknowledgement/16/83/EPI_ISL_1311683.json</a> |
| Netherlands/NB-EMC-761/2020         | EPI_ISL_1310968 | Dutch COVID-19 response team | Erasmus Medical Center                                     | Bas Oude Munnink et al | <a href="https://www.epicov.org/acknowledgement/09/68/EPI_ISL_1310968.json">https://www.epicov.org/acknowledgement/09/68/EPI_ISL_1310968.json</a> |
| Netherlands/NB-EMC-762/2020         | EPI_ISL_1311286 | Dutch COVID-19 response team | Erasmus Medical Center                                     | Bas Oude Munnink et al | <a href="https://www.epicov.org/acknowledgement/12/86/EPI_ISL_1311286.json">https://www.epicov.org/acknowledgement/12/86/EPI_ISL_1311286.json</a> |
| Netherlands/NB-EMC-763/2020         | EPI_ISL_1311232 | Dutch COVID-19 response team | Erasmus Medical Center                                     | Bas Oude Munnink et al | <a href="https://www.epicov.org/acknowledgement/12/32/EPI_ISL_1311232.json">https://www.epicov.org/acknowledgement/12/32/EPI_ISL_1311232.json</a> |
| Netherlands/NB-EMC-764/2020         | EPI_ISL_1310943 | Dutch COVID-19 response team | Erasmus Medical Center                                     | Bas Oude Munnink et al | <a href="https://www.epicov.org/acknowledgement/09/43/EPI_ISL_1310943.json">https://www.epicov.org/acknowledgement/09/43/EPI_ISL_1310943.json</a> |
| Netherlands/NB-EMC-766/2020         | EPI_ISL_1311054 | Dutch COVID-19 response team | Erasmus Medical Center                                     | Bas Oude Munnink et al | <a href="https://www.epicov.org/acknowledgement/10/54/EPI_ISL_1311054.json">https://www.epicov.org/acknowledgement/10/54/EPI_ISL_1311054.json</a> |
| Netherlands/NB-EMC-813/2020         | EPI_ISL_1311727 | Dutch COVID-19 response team | Erasmus Medical Center                                     | Bas Oude Munnink et al | <a href="https://www.epicov.org/acknowledgement/17/27/EPI_ISL_1311727.json">https://www.epicov.org/acknowledgement/17/27/EPI_ISL_1311727.json</a> |
| Netherlands/NB-EMC-841/2020         | EPI_ISL_1311267 | Dutch COVID-19 response team | Erasmus Medical Center                                     | Bas Oude Munnink et al | <a href="https://www.epicov.org/acknowledgement/12/67/EPI_ISL_1311267.json">https://www.epicov.org/acknowledgement/12/67/EPI_ISL_1311267.json</a> |
| Netherlands/NB-EMC-843/2020         | EPI_ISL_1311757 | Dutch COVID-19 response team | Erasmus Medical Center                                     | Bas Oude Munnink et al | <a href="https://www.epicov.org/acknowledgement/17/57/EPI_ISL_1311757.json">https://www.epicov.org/acknowledgement/17/57/EPI_ISL_1311757.json</a> |
| Netherlands/NB-EMC-845/2020         | EPI_ISL_1311759 | Dutch COVID-19 response team | Erasmus Medical Center                                     | Bas Oude Munnink et al | <a href="https://www.epicov.org/acknowledgement/17/59/EPI_ISL_1311759.json">https://www.epicov.org/acknowledgement/17/59/EPI_ISL_1311759.json</a> |
| Netherlands/NB-EMC-846/2020         | EPI_ISL_1311760 | Dutch COVID-19 response team | Erasmus Medical Center                                     | Bas Oude Munnink et al | <a href="https://www.epicov.org/acknowledgement/17/60/EPI_ISL_1311760.json">https://www.epicov.org/acknowledgement/17/60/EPI_ISL_1311760.json</a> |
| Netherlands/NB-EMC-847/2020         | EPI_ISL_1311761 | Dutch COVID-19 response team | Erasmus Medical Center                                     | Bas Oude Munnink et al | <a href="https://www.epicov.org/acknowledgement/17/61/EPI_ISL_1311761.json">https://www.epicov.org/acknowledgement/17/61/EPI_ISL_1311761.json</a> |
| Netherlands/NB-EMC-848/2020         | EPI_ISL_1310852 | Dutch COVID-19 response team | Erasmus Medical Center                                     | Bas Oude Munnink et al | <a href="https://www.epicov.org/acknowledgement/08/52/EPI_ISL_1310852.json">https://www.epicov.org/acknowledgement/08/52/EPI_ISL_1310852.json</a> |
| Netherlands/NB-EMC-851/2020         | EPI_ISL_1311764 | Dutch COVID-19 response team | Erasmus Medical Center                                     | Bas Oude Munnink et al | <a href="https://www.epicov.org/acknowledgement/17/64/EPI_ISL_1311764.json">https://www.epicov.org/acknowledgement/17/64/EPI_ISL_1311764.json</a> |
| Netherlands/NB-EMC-854/2020         | EPI_ISL_1311275 | Dutch COVID-19 response team | Erasmus Medical Center                                     | Bas Oude Munnink et al | <a href="https://www.epicov.org/acknowledgement/12/75/EPI_ISL_1311275.json">https://www.epicov.org/acknowledgement/12/75/EPI_ISL_1311275.json</a> |
| Netherlands/NB-EMC-857/2020         | EPI_ISL_1311805 | Dutch COVID-19 response team | Erasmus Medical Center                                     | Bas Oude Munnink et al | <a href="https://www.epicov.org/acknowledgement/18/05/EPI_ISL_1311805.json">https://www.epicov.org/acknowledgement/18/05/EPI_ISL_1311805.json</a> |
| Netherlands/NB-MUMC-172/2020        | EPI_ISL_965800  | Dutch COVID-19 response team | Medical Microbiology, Maastricht University Medical Centre | Jozef Dingemans* et al | <a href="https://www.epicov.org/acknowledgement/58/00/EPI_ISL_965800.json">https://www.epicov.org/acknowledgement/58/00/EPI_ISL_965800.json</a>   |
| Netherlands/NB-MVD-CWGS2101092/2020 | EPI_ISL_2731388 | Microvida                    | Microvida                                                  | Suzan D. Pas et al     | <a href="https://www.epicov.org/acknowledgement/13/88/EPI_ISL_2731388.json">https://www.epicov.org/acknowledgement/13/88/EPI_ISL_2731388.json</a> |
| Netherlands/NB-MVD-CWGS2101098/2020 | EPI_ISL_2731390 | Microvida                    | Microvida                                                  | Suzan D. Pas et al     | <a href="https://www.epicov.org/acknowledgement/13/90/EPI_ISL_2731390.json">https://www.epicov.org/acknowledgement/13/90/EPI_ISL_2731390.json</a> |
| Netherlands/NB-MVD-CWGS2101101/2020 | EPI_ISL_2731392 | Microvida                    | Microvida                                                  | Suzan D. Pas et al     | <a href="https://www.epicov.org/acknowledgement/13/92/EPI_ISL_2731392.json">https://www.epicov.org/acknowledgement/13/92/EPI_ISL_2731392.json</a> |
| Netherlands/NB-MVD-CWGS2101103/2020 | EPI_ISL_2731394 | Microvida                    | Microvida                                                  | Suzan D. Pas et al     | <a href="https://www.epicov.org/acknowledgement/13/94/EPI_ISL_2731394.json">https://www.epicov.org/acknowledgement/13/94/EPI_ISL_2731394.json</a> |
| Netherlands/NB-MVD-CWGS2101107/2020 | EPI_ISL_2731342 | Microvida                    | Microvida                                                  | Suzan D. Pas et al     | <a href="https://www.epicov.org/acknowledgement/13/42/EPI_ISL_2731342.json">https://www.epicov.org/acknowledgement/13/42/EPI_ISL_2731342.json</a> |
| Netherlands/NB-MVD-CWGS2101109/2020 | EPI_ISL_2731330 | Microvida                    | Microvida                                                  | Suzan D. Pas et al     | <a href="https://www.epicov.org/acknowledgement/13/30/EPI_ISL_2731330.json">https://www.epicov.org/acknowledgement/13/30/EPI_ISL_2731330.json</a> |
| Netherlands/NB-MVD-CWGS2101112/2020 | EPI_ISL_2731350 | Microvida                    | Microvida                                                  | Suzan D. Pas et al     | <a href="https://www.epicov.org/acknowledgement/13/50/EPI_ISL_2731350.json">https://www.epicov.org/acknowledgement/13/50/EPI_ISL_2731350.json</a> |

| seq_id                              | gisaid_epi_isl  | originating_lab              | submitting_lab                                                  | authors                | url                                                                                                                                               |
|-------------------------------------|-----------------|------------------------------|-----------------------------------------------------------------|------------------------|---------------------------------------------------------------------------------------------------------------------------------------------------|
| Netherlands/NB-MVD-CWGS2101113/2020 | EPI_ISL_2731397 | Microvida                    | Microvida                                                       | Suzan D. Pas et al     | <a href="https://www.epicov.org/acknowledgement/13/97/EPI_ISL_2731397.json">https://www.epicov.org/acknowledgement/13/97/EPI_ISL_2731397.json</a> |
| Netherlands/NB-MVD-CWGS2101116/2020 | EPI_ISL_2731400 | Microvida                    | Microvida                                                       | Suzan D. Pas et al     | <a href="https://www.epicov.org/acknowledgement/14/00/EPI_ISL_2731400.json">https://www.epicov.org/acknowledgement/14/00/EPI_ISL_2731400.json</a> |
| Netherlands/NB-MVD-CWGS2101119/2020 | EPI_ISL_2731402 | Microvida                    | Microvida                                                       | Suzan D. Pas et al     | <a href="https://www.epicov.org/acknowledgement/14/02/EPI_ISL_2731402.json">https://www.epicov.org/acknowledgement/14/02/EPI_ISL_2731402.json</a> |
| Netherlands/NB-MVD-CWGS2101125/2020 | EPI_ISL_2731381 | Microvida                    | Microvida                                                       | Suzan D. Pas et al     | <a href="https://www.epicov.org/acknowledgement/13/81/EPI_ISL_2731381.json">https://www.epicov.org/acknowledgement/13/81/EPI_ISL_2731381.json</a> |
| Netherlands/NB-MVD-CWGS2101126/2020 | EPI_ISL_2731382 | Microvida                    | Microvida                                                       | Suzan D. Pas et al     | <a href="https://www.epicov.org/acknowledgement/13/82/EPI_ISL_2731382.json">https://www.epicov.org/acknowledgement/13/82/EPI_ISL_2731382.json</a> |
| Netherlands/NB-MVD-CWGS2101133/2020 | EPI_ISL_2731385 | Microvida                    | Microvida                                                       | Suzan D. Pas et al     | <a href="https://www.epicov.org/acknowledgement/13/85/EPI_ISL_2731385.json">https://www.epicov.org/acknowledgement/13/85/EPI_ISL_2731385.json</a> |
| Netherlands/NB-RIVM-10293/2020      | EPI_ISL_636548  | Dutch COVID-19 response team | National Institute for Public Health and the Environment (RIVM) | Adam Meijer et al      | <a href="https://www.epicov.org/acknowledgement/65/48/EPI_ISL_636548.json">https://www.epicov.org/acknowledgement/65/48/EPI_ISL_636548.json</a>   |
| Netherlands/NB-RIVM-10298/2020      | EPI_ISL_636550  | Dutch COVID-19 response team | National Institute for Public Health and the Environment (RIVM) | Adam Meijer et al      | <a href="https://www.epicov.org/acknowledgement/65/50/EPI_ISL_636550.json">https://www.epicov.org/acknowledgement/65/50/EPI_ISL_636550.json</a>   |
| Netherlands/NB-RIVM-10299/2020      | EPI_ISL_636551  | Dutch COVID-19 response team | National Institute for Public Health and the Environment (RIVM) | Adam Meijer et al      | <a href="https://www.epicov.org/acknowledgement/65/51/EPI_ISL_636551.json">https://www.epicov.org/acknowledgement/65/51/EPI_ISL_636551.json</a>   |
| Netherlands/NB-RIVM-10361/2020      | EPI_ISL_636556  | Dutch COVID-19 response team | National Institute for Public Health and the Environment (RIVM) | Adam Meijer et al      | <a href="https://www.epicov.org/acknowledgement/65/56/EPI_ISL_636556.json">https://www.epicov.org/acknowledgement/65/56/EPI_ISL_636556.json</a>   |
| Netherlands/NB-RIVM-10363/2020      | EPI_ISL_636558  | Dutch COVID-19 response team | National Institute for Public Health and the Environment (RIVM) | Adam Meijer et al      | <a href="https://www.epicov.org/acknowledgement/65/58/EPI_ISL_636558.json">https://www.epicov.org/acknowledgement/65/58/EPI_ISL_636558.json</a>   |
| Netherlands/NB-RIVM-10397/2020      | EPI_ISL_636559  | Dutch COVID-19 response team | National Institute for Public Health and the Environment (RIVM) | Adam Meijer et al      | <a href="https://www.epicov.org/acknowledgement/65/59/EPI_ISL_636559.json">https://www.epicov.org/acknowledgement/65/59/EPI_ISL_636559.json</a>   |
| Netherlands/NB-RIVM-21387/2020      | EPI_ISL_905383  | Dutch COVID-19 response team | National Institute for Public Health and the Environment (RIVM) | Adam Meijer et al      | <a href="https://www.epicov.org/acknowledgement/53/83/EPI_ISL_905383.json">https://www.epicov.org/acknowledgement/53/83/EPI_ISL_905383.json</a>   |
| Netherlands/NB-RIVM-21742/2020      | EPI_ISL_1035607 | Dutch COVID-19 response team | National Institute for Public Health and the Environment (RIVM) | Adam Meijer et al      | <a href="https://www.epicov.org/acknowledgement/56/07/EPI_ISL_1035607.json">https://www.epicov.org/acknowledgement/56/07/EPI_ISL_1035607.json</a> |
| Netherlands/NH-EMC-37/2020          | EPI_ISL_523406  | Dutch COVID-19 response team | Erasmus Medical Center                                          | Bas Oude Munnink et al | <a href="https://www.epicov.org/acknowledgement/34/06/EPI_ISL_523406.json">https://www.epicov.org/acknowledgement/34/06/EPI_ISL_523406.json</a>   |
| Netherlands/NH-EMC-41/2020          | EPI_ISL_523410  | Dutch COVID-19 response team | Erasmus Medical Center                                          | Bas Oude Munnink et al | <a href="https://www.epicov.org/acknowledgement/34/10/EPI_ISL_523410.json">https://www.epicov.org/acknowledgement/34/10/EPI_ISL_523410.json</a>   |
| Netherlands/NH-EMC-43/2020          | EPI_ISL_523412  | Dutch COVID-19 response team | Erasmus Medical Center                                          | Bas Oude Munnink et al | <a href="https://www.epicov.org/acknowledgement/34/12/EPI_ISL_523412.json">https://www.epicov.org/acknowledgement/34/12/EPI_ISL_523412.json</a>   |
| Netherlands/NH-EMC-44/2020          | EPI_ISL_523413  | Dutch COVID-19 response team | Erasmus Medical Center                                          | Bas Oude Munnink et al | <a href="https://www.epicov.org/acknowledgement/34/13/EPI_ISL_523413.json">https://www.epicov.org/acknowledgement/34/13/EPI_ISL_523413.json</a>   |
| Netherlands/NH-EMC-48/2020          | EPI_ISL_523417  | Dutch COVID-19 response team | Erasmus Medical Center                                          | Bas Oude Munnink et al | <a href="https://www.epicov.org/acknowledgement/34/17/EPI_ISL_523417.json">https://www.epicov.org/acknowledgement/34/17/EPI_ISL_523417.json</a>   |
| Netherlands/NH-EMC-53/2020          | EPI_ISL_577849  | Dutch COVID-19 response team | Erasmus Medical Center                                          | Bas Oude Munnink et al | <a href="https://www.epicov.org/acknowledgement/78/49/EPI_ISL_577849.json">https://www.epicov.org/acknowledgement/78/49/EPI_ISL_577849.json</a>   |
| Netherlands/NH-EMC-60/2020          | EPI_ISL_577856  | Dutch COVID-19 response team | Erasmus Medical Center                                          | Bas Oude Munnink et al | <a href="https://www.epicov.org/acknowledgement/78/56/EPI_ISL_577856.json">https://www.epicov.org/acknowledgement/78/56/EPI_ISL_577856.json</a>   |
| Netherlands/NH-EMC-62/2020          | EPI_ISL_577858  | Dutch COVID-19 response team | Erasmus Medical Center                                          | Bas Oude Munnink et al | <a href="https://www.epicov.org/acknowledgement/78/58/EPI_ISL_577858.json">https://www.epicov.org/acknowledgement/78/58/EPI_ISL_577858.json</a>   |
| Netherlands/NH-EMC-63/2020          | EPI_ISL_577859  | Dutch COVID-19 response team | Erasmus Medical Center                                          | Bas Oude Munnink et al | <a href="https://www.epicov.org/acknowledgement/78/59/EPI_ISL_577859.json">https://www.epicov.org/acknowledgement/78/59/EPI_ISL_577859.json</a>   |
| Netherlands/NH-EMC-70/2020          | EPI_ISL_577866  | Dutch COVID-19 response team | Erasmus Medical Center                                          | Bas Oude Munnink et al | <a href="https://www.epicov.org/acknowledgement/78/66/EPI_ISL_577866.json">https://www.epicov.org/acknowledgement/78/66/EPI_ISL_577866.json</a>   |
| Netherlands/NH-EMC-72/2020          | EPI_ISL_632520  | Dutch COVID-19 response team | Erasmus Medical Center                                          | Bas Oude Munnink et al | <a href="https://www.epicov.org/acknowledgement/25/20/EPI_ISL_632520.json">https://www.epicov.org/acknowledgement/25/20/EPI_ISL_632520.json</a>   |

| seq_id                         | gisaid_epi_isl  | originating_lab              | submitting_lab                                                  | authors                | url                                                                                                                                               |
|--------------------------------|-----------------|------------------------------|-----------------------------------------------------------------|------------------------|---------------------------------------------------------------------------------------------------------------------------------------------------|
| Netherlands/NH-EMC-77/2020     | EPI_ISL_632386  | Dutch COVID-19 response team | Erasmus Medical Center                                          | Bas Oude Munnink et al | <a href="https://www.epicov.org/acknowledgement/23/86/EPI_ISL_632386.json">https://www.epicov.org/acknowledgement/23/86/EPI_ISL_632386.json</a>   |
| Netherlands/NH-EMC-79/2020     | EPI_ISL_632526  | Dutch COVID-19 response team | Erasmus Medical Center                                          | Bas Oude Munnink et al | <a href="https://www.epicov.org/acknowledgement/25/26/EPI_ISL_632526.json">https://www.epicov.org/acknowledgement/25/26/EPI_ISL_632526.json</a>   |
| Netherlands/NH-EMC-81/2020     | EPI_ISL_632528  | Dutch COVID-19 response team | Erasmus Medical Center                                          | Bas Oude Munnink et al | <a href="https://www.epicov.org/acknowledgement/25/28/EPI_ISL_632528.json">https://www.epicov.org/acknowledgement/25/28/EPI_ISL_632528.json</a>   |
| Netherlands/NH-EMC-83/2020     | EPI_ISL_632529  | Dutch COVID-19 response team | Erasmus Medical Center                                          | Bas Oude Munnink et al | <a href="https://www.epicov.org/acknowledgement/25/29/EPI_ISL_632529.json">https://www.epicov.org/acknowledgement/25/29/EPI_ISL_632529.json</a>   |
| Netherlands/NH-EMC-89/2020     | EPI_ISL_632346  | Dutch COVID-19 response team | Erasmus Medical Center                                          | Bas Oude Munnink et al | <a href="https://www.epicov.org/acknowledgement/23/46/EPI_ISL_632346.json">https://www.epicov.org/acknowledgement/23/46/EPI_ISL_632346.json</a>   |
| Netherlands/NH-EMC-90/2020     | EPI_ISL_632350  | Dutch COVID-19 response team | Erasmus Medical Center                                          | Bas Oude Munnink et al | <a href="https://www.epicov.org/acknowledgement/23/50/EPI_ISL_632350.json">https://www.epicov.org/acknowledgement/23/50/EPI_ISL_632350.json</a>   |
| Netherlands/NH-EMC-91/2020     | EPI_ISL_632340  | Dutch COVID-19 response team | Erasmus Medical Center                                          | Bas Oude Munnink et al | <a href="https://www.epicov.org/acknowledgement/23/40/EPI_ISL_632340.json">https://www.epicov.org/acknowledgement/23/40/EPI_ISL_632340.json</a>   |
| Netherlands/NH-EMC-92/2020     | EPI_ISL_632335  | Dutch COVID-19 response team | Erasmus Medical Center                                          | Bas Oude Munnink et al | <a href="https://www.epicov.org/acknowledgement/23/35/EPI_ISL_632335.json">https://www.epicov.org/acknowledgement/23/35/EPI_ISL_632335.json</a>   |
| Netherlands/NH-EMC-94/2020     | EPI_ISL_722557  | Dutch COVID-19 response team | Erasmus Medical Center                                          | Bas Oude Munnink et al | <a href="https://www.epicov.org/acknowledgement/25/57/EPI_ISL_722557.json">https://www.epicov.org/acknowledgement/25/57/EPI_ISL_722557.json</a>   |
| Netherlands/NH-RIVM-10353/2020 | EPI_ISL_636566  | Dutch COVID-19 response team | National Institute for Public Health and the Environment (RIVM) | Adam Meijer et al      | <a href="https://www.epicov.org/acknowledgement/65/66/EPI_ISL_636566.json">https://www.epicov.org/acknowledgement/65/66/EPI_ISL_636566.json</a>   |
| Netherlands/NH-RIVM-20926/2020 | EPI_ISL_790953  | Dutch COVID-19 response team | National Institute for Public Health and the Environment (RIVM) | Adam Meijer et al      | <a href="https://www.epicov.org/acknowledgement/09/53/EPI_ISL_790953.json">https://www.epicov.org/acknowledgement/09/53/EPI_ISL_790953.json</a>   |
| Netherlands/NH-RIVM-21082/2020 | EPI_ISL_824024  | Dutch COVID-19 response team | National Institute for Public Health and the Environment (RIVM) | Adam Meijer et al      | <a href="https://www.epicov.org/acknowledgement/40/24/EPI_ISL_824024.json">https://www.epicov.org/acknowledgement/40/24/EPI_ISL_824024.json</a>   |
| Netherlands/NH-RIVM-21751/2020 | EPI_ISL_1035591 | Dutch COVID-19 response team | National Institute for Public Health and the Environment (RIVM) | Adam Meijer et al      | <a href="https://www.epicov.org/acknowledgement/55/91/EPI_ISL_1035591.json">https://www.epicov.org/acknowledgement/55/91/EPI_ISL_1035591.json</a> |
| Netherlands/NH-RIVM-21778/2020 | EPI_ISL_1498165 | Dutch COVID-19 response team | National Institute for Public Health and the Environment (RIVM) | Adam Meijer et al      | <a href="https://www.epicov.org/acknowledgement/81/65/EPI_ISL_1498165.json">https://www.epicov.org/acknowledgement/81/65/EPI_ISL_1498165.json</a> |
| Netherlands/NH-RIVM-21784/2020 | EPI_ISL_1498171 | Dutch COVID-19 response team | National Institute for Public Health and the Environment (RIVM) | Adam Meijer et al      | <a href="https://www.epicov.org/acknowledgement/81/71/EPI_ISL_1498171.json">https://www.epicov.org/acknowledgement/81/71/EPI_ISL_1498171.json</a> |
| Netherlands/NH-RIVM-21786/2020 | EPI_ISL_1498173 | Dutch COVID-19 response team | National Institute for Public Health and the Environment (RIVM) | Adam Meijer et al      | <a href="https://www.epicov.org/acknowledgement/81/73/EPI_ISL_1498173.json">https://www.epicov.org/acknowledgement/81/73/EPI_ISL_1498173.json</a> |
| Netherlands/NH-RIVM-21787/2020 | EPI_ISL_1498174 | Dutch COVID-19 response team | National Institute for Public Health and the Environment (RIVM) | Adam Meijer et al      | <a href="https://www.epicov.org/acknowledgement/81/74/EPI_ISL_1498174.json">https://www.epicov.org/acknowledgement/81/74/EPI_ISL_1498174.json</a> |
| Netherlands/NH-RIVM-21790/2020 | EPI_ISL_1498177 | Dutch COVID-19 response team | National Institute for Public Health and the Environment (RIVM) | Adam Meijer et al      | <a href="https://www.epicov.org/acknowledgement/81/77/EPI_ISL_1498177.json">https://www.epicov.org/acknowledgement/81/77/EPI_ISL_1498177.json</a> |
| Netherlands/NH-RIVM-21791/2020 | EPI_ISL_1498178 | Dutch COVID-19 response team | National Institute for Public Health and the Environment (RIVM) | Adam Meijer et al      | <a href="https://www.epicov.org/acknowledgement/81/78/EPI_ISL_1498178.json">https://www.epicov.org/acknowledgement/81/78/EPI_ISL_1498178.json</a> |
| Netherlands/NH-RIVM-21794/2020 | EPI_ISL_1498181 | Dutch COVID-19 response team | National Institute for Public Health and the Environment (RIVM) | Adam Meijer et al      | <a href="https://www.epicov.org/acknowledgement/81/81/EPI_ISL_1498181.json">https://www.epicov.org/acknowledgement/81/81/EPI_ISL_1498181.json</a> |
| Netherlands/NH-RIVM-21795/2020 | EPI_ISL_1498182 | Dutch COVID-19 response team | National Institute for Public Health and the Environment (RIVM) | Adam Meijer et al      | <a href="https://www.epicov.org/acknowledgement/81/82/EPI_ISL_1498182.json">https://www.epicov.org/acknowledgement/81/82/EPI_ISL_1498182.json</a> |
| Netherlands/NH-RIVM-21797/2020 | EPI_ISL_1498184 | Dutch COVID-19 response team | National Institute for Public Health and the Environment (RIVM) | Adam Meijer et al      | <a href="https://www.epicov.org/acknowledgement/81/84/EPI_ISL_1498184.json">https://www.epicov.org/acknowledgement/81/84/EPI_ISL_1498184.json</a> |
| Netherlands/NH-RIVM-21801/2020 | EPI_ISL_1498188 | Dutch COVID-19 response team | National Institute for Public Health and the Environment (RIVM) | Adam Meijer et al      | <a href="https://www.epicov.org/acknowledgement/81/88/EPI_ISL_1498188.json">https://www.epicov.org/acknowledgement/81/88/EPI_ISL_1498188.json</a> |
| Netherlands/NH-RIVM-21804/2020 | EPI_ISL_1498191 | Dutch COVID-19 response team | National Institute for Public Health and the Environment (RIVM) | Adam Meijer et al      | <a href="https://www.epicov.org/acknowledgement/81/91/EPI_ISL_1498191.json">https://www.epicov.org/acknowledgement/81/91/EPI_ISL_1498191.json</a> |
| Netherlands/NH-RIVM-21806/2020 | EPI_ISL_1498193 | Dutch COVID-19 response team | National Institute for Public Health and the Environment (RIVM) | Adam Meijer et al      | <a href="https://www.epicov.org/acknowledgement/81/93/EPI_ISL_1498193.json">https://www.epicov.org/acknowledgement/81/93/EPI_ISL_1498193.json</a> |

| seq_id                           | gisaid_epi_isl  | originating_lab              | submitting_lab                                                  | authors                | url                                                                                                                                               |
|----------------------------------|-----------------|------------------------------|-----------------------------------------------------------------|------------------------|---------------------------------------------------------------------------------------------------------------------------------------------------|
| Netherlands/NH-RIVM-21809/2020   | EPI_ISL_1498196 | Dutch COVID-19 response team | National Institute for Public Health and the Environment (RIVM) | Adam Meijer et al      | <a href="https://www.epicov.org/acknowledgement/81/96/EPI_ISL_1498196.json">https://www.epicov.org/acknowledgement/81/96/EPI_ISL_1498196.json</a> |
| Netherlands/NH-RIVM-21810/2020   | EPI_ISL_1498197 | Dutch COVID-19 response team | National Institute for Public Health and the Environment (RIVM) | Adam Meijer et al      | <a href="https://www.epicov.org/acknowledgement/81/97/EPI_ISL_1498197.json">https://www.epicov.org/acknowledgement/81/97/EPI_ISL_1498197.json</a> |
| Netherlands/NH-RIVM-21813/2020   | EPI_ISL_1498200 | Dutch COVID-19 response team | National Institute for Public Health and the Environment (RIVM) | Adam Meijer et al      | <a href="https://www.epicov.org/acknowledgement/82/00/EPI_ISL_1498200.json">https://www.epicov.org/acknowledgement/82/00/EPI_ISL_1498200.json</a> |
| Netherlands/NH-RIVM-21814/2020   | EPI_ISL_1498201 | Dutch COVID-19 response team | National Institute for Public Health and the Environment (RIVM) | Adam Meijer et al      | <a href="https://www.epicov.org/acknowledgement/82/01/EPI_ISL_1498201.json">https://www.epicov.org/acknowledgement/82/01/EPI_ISL_1498201.json</a> |
| Netherlands/NoordHolland_24/2020 | EPI_ISL_461214  | Dutch COVID-19 response team | Erasmus Medical Center                                          | Bas Oude Munnink et al | <a href="https://www.epicov.org/acknowledgement/12/14/EPI_ISL_461214.json">https://www.epicov.org/acknowledgement/12/14/EPI_ISL_461214.json</a>   |
| Netherlands/NoordHolland_29/2020 | EPI_ISL_461219  | Dutch COVID-19 response team | Erasmus Medical Center                                          | Bas Oude Munnink et al | <a href="https://www.epicov.org/acknowledgement/12/19/EPI_ISL_461219.json">https://www.epicov.org/acknowledgement/12/19/EPI_ISL_461219.json</a>   |
| Netherlands/NoordHolland_30/2020 | EPI_ISL_461220  | Dutch COVID-19 response team | Erasmus Medical Center                                          | Bas Oude Munnink et al | <a href="https://www.epicov.org/acknowledgement/12/20/EPI_ISL_461220.json">https://www.epicov.org/acknowledgement/12/20/EPI_ISL_461220.json</a>   |
| Netherlands/NoordHolland_35/2020 | EPI_ISL_461224  | Dutch COVID-19 response team | Erasmus Medical Center                                          | Bas Oude Munnink et al | <a href="https://www.epicov.org/acknowledgement/12/24/EPI_ISL_461224.json">https://www.epicov.org/acknowledgement/12/24/EPI_ISL_461224.json</a>   |
| Netherlands/OV-EMC-109/2020      | EPI_ISL_722837  | Dutch COVID-19 response team | Erasmus Medical Center                                          | Bas Oude Munnink et al | <a href="https://www.epicov.org/acknowledgement/28/37/EPI_ISL_722837.json">https://www.epicov.org/acknowledgement/28/37/EPI_ISL_722837.json</a>   |
| Netherlands/OV-EMC-163/2020      | EPI_ISL_1311038 | Dutch COVID-19 response team | Erasmus Medical Center                                          | Bas Oude Munnink et al | <a href="https://www.epicov.org/acknowledgement/10/38/EPI_ISL_1311038.json">https://www.epicov.org/acknowledgement/10/38/EPI_ISL_1311038.json</a> |
| Netherlands/OV-EMC-164/2020      | EPI_ISL_1311666 | Dutch COVID-19 response team | Erasmus Medical Center                                          | Bas Oude Munnink et al | <a href="https://www.epicov.org/acknowledgement/16/66/EPI_ISL_1311666.json">https://www.epicov.org/acknowledgement/16/66/EPI_ISL_1311666.json</a> |
| Netherlands/OV-EMC-166/2020      | EPI_ISL_1310970 | Dutch COVID-19 response team | Erasmus Medical Center                                          | Bas Oude Munnink et al | <a href="https://www.epicov.org/acknowledgement/09/70/EPI_ISL_1310970.json">https://www.epicov.org/acknowledgement/09/70/EPI_ISL_1310970.json</a> |
| Netherlands/OV-EMC-167/2020      | EPI_ISL_1310863 | Dutch COVID-19 response team | Erasmus Medical Center                                          | Bas Oude Munnink et al | <a href="https://www.epicov.org/acknowledgement/08/63/EPI_ISL_1310863.json">https://www.epicov.org/acknowledgement/08/63/EPI_ISL_1310863.json</a> |
| Netherlands/OV-EMC-168/2020      | EPI_ISL_1311013 | Dutch COVID-19 response team | Erasmus Medical Center                                          | Bas Oude Munnink et al | <a href="https://www.epicov.org/acknowledgement/10/13/EPI_ISL_1311013.json">https://www.epicov.org/acknowledgement/10/13/EPI_ISL_1311013.json</a> |
| Netherlands/OV-EMC-169/2020      | EPI_ISL_1311085 | Dutch COVID-19 response team | Erasmus Medical Center                                          | Bas Oude Munnink et al | <a href="https://www.epicov.org/acknowledgement/10/85/EPI_ISL_1311085.json">https://www.epicov.org/acknowledgement/10/85/EPI_ISL_1311085.json</a> |
| Netherlands/OV-EMC-170/2020      | EPI_ISL_1311230 | Dutch COVID-19 response team | Erasmus Medical Center                                          | Bas Oude Munnink et al | <a href="https://www.epicov.org/acknowledgement/12/30/EPI_ISL_1311230.json">https://www.epicov.org/acknowledgement/12/30/EPI_ISL_1311230.json</a> |
| Netherlands/OV-EMC-171/2020      | EPI_ISL_1311670 | Dutch COVID-19 response team | Erasmus Medical Center                                          | Bas Oude Munnink et al | <a href="https://www.epicov.org/acknowledgement/16/70/EPI_ISL_1311670.json">https://www.epicov.org/acknowledgement/16/70/EPI_ISL_1311670.json</a> |
| Netherlands/OV-EMC-172/2020      | EPI_ISL_1311671 | Dutch COVID-19 response team | Erasmus Medical Center                                          | Bas Oude Munnink et al | <a href="https://www.epicov.org/acknowledgement/16/71/EPI_ISL_1311671.json">https://www.epicov.org/acknowledgement/16/71/EPI_ISL_1311671.json</a> |
| Netherlands/OV-EMC-174/2020      | EPI_ISL_1311319 | Dutch COVID-19 response team | Erasmus Medical Center                                          | Bas Oude Munnink et al | <a href="https://www.epicov.org/acknowledgement/13/19/EPI_ISL_1311319.json">https://www.epicov.org/acknowledgement/13/19/EPI_ISL_1311319.json</a> |
| Netherlands/OV-EMC-175/2020      | EPI_ISL_1311673 | Dutch COVID-19 response team | Erasmus Medical Center                                          | Bas Oude Munnink et al | <a href="https://www.epicov.org/acknowledgement/16/73/EPI_ISL_1311673.json">https://www.epicov.org/acknowledgement/16/73/EPI_ISL_1311673.json</a> |
| Netherlands/OV-EMC-176/2020      | EPI_ISL_1311674 | Dutch COVID-19 response team | Erasmus Medical Center                                          | Bas Oude Munnink et al | <a href="https://www.epicov.org/acknowledgement/16/74/EPI_ISL_1311674.json">https://www.epicov.org/acknowledgement/16/74/EPI_ISL_1311674.json</a> |
| Netherlands/OV-EMC-177/2020      | EPI_ISL_1311086 | Dutch COVID-19 response team | Erasmus Medical Center                                          | Bas Oude Munnink et al | <a href="https://www.epicov.org/acknowledgement/10/86/EPI_ISL_1311086.json">https://www.epicov.org/acknowledgement/10/86/EPI_ISL_1311086.json</a> |
| Netherlands/OV-EMC-183/2020      | EPI_ISL_1311083 | Dutch COVID-19 response team | Erasmus Medical Center                                          | Bas Oude Munnink et al | <a href="https://www.epicov.org/acknowledgement/10/83/EPI_ISL_1311083.json">https://www.epicov.org/acknowledgement/10/83/EPI_ISL_1311083.json</a> |
| Netherlands/OV-EMC-186/2020      | EPI_ISL_1310853 | Dutch COVID-19 response team | Erasmus Medical Center                                          | Bas Oude Munnink et al | <a href="https://www.epicov.org/acknowledgement/08/53/EPI_ISL_1310853.json">https://www.epicov.org/acknowledgement/08/53/EPI_ISL_1310853.json</a> |
| Netherlands/OV-EMC-40/2020       | EPI_ISL_523424  | Dutch COVID-19 response team | Erasmus Medical Center                                          | Bas Oude Munnink et al | <a href="https://www.epicov.org/acknowledgement/34/24/EPI_ISL_523424.json">https://www.epicov.org/acknowledgement/34/24/EPI_ISL_523424.json</a>   |



| seq_id                         | gisaid_epi_isl  | originating_lab              | submitting_lab                                                  | authors                | url                                                                                                                                               |
|--------------------------------|-----------------|------------------------------|-----------------------------------------------------------------|------------------------|---------------------------------------------------------------------------------------------------------------------------------------------------|
| Netherlands/OV-EMC-51/2020     | EPI_ISL_523435  | Dutch COVID-19 response team | Erasmus Medical Center                                          | Bas Oude Munnink et al | <a href="https://www.epicov.org/acknowledgement/34/35/EPI_ISL_523435.json">https://www.epicov.org/acknowledgement/34/35/EPI_ISL_523435.json</a>   |
| Netherlands/OV-EMC-53/2020     | EPI_ISL_523437  | Dutch COVID-19 response team | Erasmus Medical Center                                          | Bas Oude Munnink et al | <a href="https://www.epicov.org/acknowledgement/34/37/EPI_ISL_523437.json">https://www.epicov.org/acknowledgement/34/37/EPI_ISL_523437.json</a>   |
| Netherlands/OV-EMC-54/2020     | EPI_ISL_523438  | Dutch COVID-19 response team | Erasmus Medical Center                                          | Bas Oude Munnink et al | <a href="https://www.epicov.org/acknowledgement/34/38/EPI_ISL_523438.json">https://www.epicov.org/acknowledgement/34/38/EPI_ISL_523438.json</a>   |
| Netherlands/OV-EMC-57/2020     | EPI_ISL_523441  | Dutch COVID-19 response team | Erasmus Medical Center                                          | Bas Oude Munnink et al | <a href="https://www.epicov.org/acknowledgement/34/41/EPI_ISL_523441.json">https://www.epicov.org/acknowledgement/34/41/EPI_ISL_523441.json</a>   |
| Netherlands/OV-EMC-63/2020     | EPI_ISL_523447  | Dutch COVID-19 response team | Erasmus Medical Center                                          | Bas Oude Munnink et al | <a href="https://www.epicov.org/acknowledgement/34/47/EPI_ISL_523447.json">https://www.epicov.org/acknowledgement/34/47/EPI_ISL_523447.json</a>   |
| Netherlands/OV-EMC-64/2020     | EPI_ISL_523448  | Dutch COVID-19 response team | Erasmus Medical Center                                          | Bas Oude Munnink et al | <a href="https://www.epicov.org/acknowledgement/34/48/EPI_ISL_523448.json">https://www.epicov.org/acknowledgement/34/48/EPI_ISL_523448.json</a>   |
| Netherlands/OV-EMC-65/2020     | EPI_ISL_523449  | Dutch COVID-19 response team | Erasmus Medical Center                                          | Bas Oude Munnink et al | <a href="https://www.epicov.org/acknowledgement/34/49/EPI_ISL_523449.json">https://www.epicov.org/acknowledgement/34/49/EPI_ISL_523449.json</a>   |
| Netherlands/OV-EMC-66/2020     | EPI_ISL_523450  | Dutch COVID-19 response team | Erasmus Medical Center                                          | Bas Oude Munnink et al | <a href="https://www.epicov.org/acknowledgement/34/50/EPI_ISL_523450.json">https://www.epicov.org/acknowledgement/34/50/EPI_ISL_523450.json</a>   |
| Netherlands/OV-EMC-67/2020     | EPI_ISL_523451  | Dutch COVID-19 response team | Erasmus Medical Center                                          | Bas Oude Munnink et al | <a href="https://www.epicov.org/acknowledgement/34/51/EPI_ISL_523451.json">https://www.epicov.org/acknowledgement/34/51/EPI_ISL_523451.json</a>   |
| Netherlands/OV-EMC-72/2020     | EPI_ISL_523456  | Dutch COVID-19 response team | Erasmus Medical Center                                          | Bas Oude Munnink et al | <a href="https://www.epicov.org/acknowledgement/34/56/EPI_ISL_523456.json">https://www.epicov.org/acknowledgement/34/56/EPI_ISL_523456.json</a>   |
| Netherlands/OV-EMC-79/2020     | EPI_ISL_523463  | Dutch COVID-19 response team | Erasmus Medical Center                                          | Bas Oude Munnink et al | <a href="https://www.epicov.org/acknowledgement/34/63/EPI_ISL_523463.json">https://www.epicov.org/acknowledgement/34/63/EPI_ISL_523463.json</a>   |
| Netherlands/OV-EMC-86/2020     | EPI_ISL_722297  | Dutch COVID-19 response team | Erasmus Medical Center                                          | Bas Oude Munnink et al | <a href="https://www.epicov.org/acknowledgement/22/97/EPI_ISL_722297.json">https://www.epicov.org/acknowledgement/22/97/EPI_ISL_722297.json</a>   |
| Netherlands/OV-EMC-88/2020     | EPI_ISL_722527  | Dutch COVID-19 response team | Erasmus Medical Center                                          | Bas Oude Munnink et al | <a href="https://www.epicov.org/acknowledgement/25/27/EPI_ISL_722527.json">https://www.epicov.org/acknowledgement/25/27/EPI_ISL_722527.json</a>   |
| Netherlands/OV-EMC-89/2020     | EPI_ISL_722435  | Dutch COVID-19 response team | Erasmus Medical Center                                          | Bas Oude Munnink et al | <a href="https://www.epicov.org/acknowledgement/24/35/EPI_ISL_722435.json">https://www.epicov.org/acknowledgement/24/35/EPI_ISL_722435.json</a>   |
| Netherlands/OV-EMC-90/2020     | EPI_ISL_722844  | Dutch COVID-19 response team | Erasmus Medical Center                                          | Bas Oude Munnink et al | <a href="https://www.epicov.org/acknowledgement/28/44/EPI_ISL_722844.json">https://www.epicov.org/acknowledgement/28/44/EPI_ISL_722844.json</a>   |
| Netherlands/OV-EMC-97/2020     | EPI_ISL_722436  | Dutch COVID-19 response team | Erasmus Medical Center                                          | Bas Oude Munnink et al | <a href="https://www.epicov.org/acknowledgement/24/36/EPI_ISL_722436.json">https://www.epicov.org/acknowledgement/24/36/EPI_ISL_722436.json</a>   |
| Netherlands/OV-EMC-98/2020     | EPI_ISL_722463  | Dutch COVID-19 response team | Erasmus Medical Center                                          | Bas Oude Munnink et al | <a href="https://www.epicov.org/acknowledgement/24/63/EPI_ISL_722463.json">https://www.epicov.org/acknowledgement/24/63/EPI_ISL_722463.json</a>   |
| Netherlands/OV-RIVM-10152/2020 | EPI_ISL_547513  | Dutch COVID-19 response team | National Institute for Public Health and the Environment (RIVM) | Adam Meijer et al      | <a href="https://www.epicov.org/acknowledgement/75/13/EPI_ISL_547513.json">https://www.epicov.org/acknowledgement/75/13/EPI_ISL_547513.json</a>   |
| Netherlands/OV-RIVM-20515/2020 | EPI_ISL_728730  | Dutch COVID-19 response team | National Institute for Public Health and the Environment (RIVM) | Adam Meijer et al      | <a href="https://www.epicov.org/acknowledgement/87/30/EPI_ISL_728730.json">https://www.epicov.org/acknowledgement/87/30/EPI_ISL_728730.json</a>   |
| Netherlands/OV-RIVM-20516/2020 | EPI_ISL_728731  | Dutch COVID-19 response team | National Institute for Public Health and the Environment (RIVM) | Adam Meijer et al      | <a href="https://www.epicov.org/acknowledgement/87/31/EPI_ISL_728731.json">https://www.epicov.org/acknowledgement/87/31/EPI_ISL_728731.json</a>   |
| Netherlands/OV-RIVM-20517/2020 | EPI_ISL_728732  | Dutch COVID-19 response team | National Institute for Public Health and the Environment (RIVM) | Adam Meijer et al      | <a href="https://www.epicov.org/acknowledgement/87/32/EPI_ISL_728732.json">https://www.epicov.org/acknowledgement/87/32/EPI_ISL_728732.json</a>   |
| Netherlands/OV-RIVM-20541/2020 | EPI_ISL_728756  | Dutch COVID-19 response team | National Institute for Public Health and the Environment (RIVM) | Adam Meijer et al      | <a href="https://www.epicov.org/acknowledgement/87/56/EPI_ISL_728756.json">https://www.epicov.org/acknowledgement/87/56/EPI_ISL_728756.json</a>   |
| Netherlands/OV-RIVM-21766/2020 | EPI_ISL_1498153 | Dutch COVID-19 response team | National Institute for Public Health and the Environment (RIVM) | Adam Meijer et al      | <a href="https://www.epicov.org/acknowledgement/81/53/EPI_ISL_1498153.json">https://www.epicov.org/acknowledgement/81/53/EPI_ISL_1498153.json</a> |
| Netherlands/OV-RIVM-21768/2020 | EPI_ISL_1498155 | Dutch COVID-19 response team | National Institute for Public Health and the Environment (RIVM) | Adam Meijer et al      | <a href="https://www.epicov.org/acknowledgement/81/55/EPI_ISL_1498155.json">https://www.epicov.org/acknowledgement/81/55/EPI_ISL_1498155.json</a> |
| Netherlands/OV-RIVM-21769/2020 | EPI_ISL_1498156 | Dutch COVID-19 response team | National Institute for Public Health and the Environment (RIVM) | Adam Meijer et al      | <a href="https://www.epicov.org/acknowledgement/81/56/EPI_ISL_1498156.json">https://www.epicov.org/acknowledgement/81/56/EPI_ISL_1498156.json</a> |

| seq_id                         | gisaid_epi_isl  | originating_lab              | submitting_lab                                                  | authors                | url                                                                                                                                               |
|--------------------------------|-----------------|------------------------------|-----------------------------------------------------------------|------------------------|---------------------------------------------------------------------------------------------------------------------------------------------------|
| Netherlands/OV-RIVM-21771/2020 | EPI_ISL_1498158 | Dutch COVID-19 response team | National Institute for Public Health and the Environment (RIVM) | Adam Meijer et al      | <a href="https://www.epicov.org/acknowledgement/81/58/EPI_ISL_1498158.json">https://www.epicov.org/acknowledgement/81/58/EPI_ISL_1498158.json</a> |
| Netherlands/OV-RIVM-21774/2020 | EPI_ISL_1498161 | Dutch COVID-19 response team | National Institute for Public Health and the Environment (RIVM) | Adam Meijer et al      | <a href="https://www.epicov.org/acknowledgement/81/61/EPI_ISL_1498161.json">https://www.epicov.org/acknowledgement/81/61/EPI_ISL_1498161.json</a> |
| Netherlands/OV-RIVM-21776/2020 | EPI_ISL_1498163 | Dutch COVID-19 response team | National Institute for Public Health and the Environment (RIVM) | Adam Meijer et al      | <a href="https://www.epicov.org/acknowledgement/81/63/EPI_ISL_1498163.json">https://www.epicov.org/acknowledgement/81/63/EPI_ISL_1498163.json</a> |
| Netherlands/OV-RIVM-21777/2020 | EPI_ISL_1498164 | Dutch COVID-19 response team | National Institute for Public Health and the Environment (RIVM) | Adam Meijer et al      | <a href="https://www.epicov.org/acknowledgement/81/64/EPI_ISL_1498164.json">https://www.epicov.org/acknowledgement/81/64/EPI_ISL_1498164.json</a> |
| Netherlands/OV-RIVM-21821/2020 | EPI_ISL_1498208 | Dutch COVID-19 response team | National Institute for Public Health and the Environment (RIVM) | Adam Meijer et al      | <a href="https://www.epicov.org/acknowledgement/82/08/EPI_ISL_1498208.json">https://www.epicov.org/acknowledgement/82/08/EPI_ISL_1498208.json</a> |
| Netherlands/OV-RIVM-21825/2020 | EPI_ISL_1498212 | Dutch COVID-19 response team | National Institute for Public Health and the Environment (RIVM) | Adam Meijer et al      | <a href="https://www.epicov.org/acknowledgement/82/12/EPI_ISL_1498212.json">https://www.epicov.org/acknowledgement/82/12/EPI_ISL_1498212.json</a> |
| Netherlands/OV-RIVM-21832/2020 | EPI_ISL_1498219 | Dutch COVID-19 response team | National Institute for Public Health and the Environment (RIVM) | Adam Meijer et al      | <a href="https://www.epicov.org/acknowledgement/82/19/EPI_ISL_1498219.json">https://www.epicov.org/acknowledgement/82/19/EPI_ISL_1498219.json</a> |
| Netherlands/OV-RIVM-21851/2020 | EPI_ISL_1498237 | Dutch COVID-19 response team | National Institute for Public Health and the Environment (RIVM) | Adam Meijer et al      | <a href="https://www.epicov.org/acknowledgement/82/37/EPI_ISL_1498237.json">https://www.epicov.org/acknowledgement/82/37/EPI_ISL_1498237.json</a> |
| Netherlands/Overijssel_34/2020 | EPI_ISL_461226  | Dutch COVID-19 response team | Erasmus Medical Center                                          | Bas Oude Munnink et al | <a href="https://www.epicov.org/acknowledgement/12/26/EPI_ISL_461226.json">https://www.epicov.org/acknowledgement/12/26/EPI_ISL_461226.json</a>   |
| Netherlands/Overijssel_35/2020 | EPI_ISL_461227  | Dutch COVID-19 response team | Erasmus Medical Center                                          | Bas Oude Munnink et al | <a href="https://www.epicov.org/acknowledgement/12/27/EPI_ISL_461227.json">https://www.epicov.org/acknowledgement/12/27/EPI_ISL_461227.json</a>   |
| Netherlands/un-EMC-712/2020    | EPI_ISL_523467  | Dutch COVID-19 response team | Erasmus Medical Center                                          | Bas Oude Munnink et al | <a href="https://www.epicov.org/acknowledgement/34/67/EPI_ISL_523467.json">https://www.epicov.org/acknowledgement/34/67/EPI_ISL_523467.json</a>   |
| Netherlands/un-EMC-736/2020    | EPI_ISL_523491  | Dutch COVID-19 response team | Erasmus Medical Center                                          | Bas Oude Munnink et al | <a href="https://www.epicov.org/acknowledgement/34/91/EPI_ISL_523491.json">https://www.epicov.org/acknowledgement/34/91/EPI_ISL_523491.json</a>   |
| Netherlands/un-EMC-739/2020    | EPI_ISL_523494  | Dutch COVID-19 response team | Erasmus Medical Center                                          | Bas Oude Munnink et al | <a href="https://www.epicov.org/acknowledgement/34/94/EPI_ISL_523494.json">https://www.epicov.org/acknowledgement/34/94/EPI_ISL_523494.json</a>   |
| Netherlands/un-EMC-744/2020    | EPI_ISL_523499  | Dutch COVID-19 response team | Erasmus Medical Center                                          | Bas Oude Munnink et al | <a href="https://www.epicov.org/acknowledgement/34/99/EPI_ISL_523499.json">https://www.epicov.org/acknowledgement/34/99/EPI_ISL_523499.json</a>   |
| Netherlands/un-EMC-755/2020    | EPI_ISL_523511  | Dutch COVID-19 response team | Erasmus Medical Center                                          | Bas Oude Munnink et al | <a href="https://www.epicov.org/acknowledgement/35/11/EPI_ISL_523511.json">https://www.epicov.org/acknowledgement/35/11/EPI_ISL_523511.json</a>   |
| Netherlands/un-EMC-756/2020    | EPI_ISL_523512  | Dutch COVID-19 response team | Erasmus Medical Center                                          | Bas Oude Munnink et al | <a href="https://www.epicov.org/acknowledgement/35/12/EPI_ISL_523512.json">https://www.epicov.org/acknowledgement/35/12/EPI_ISL_523512.json</a>   |
| Netherlands/un-EMC-757/2020    | EPI_ISL_523513  | Dutch COVID-19 response team | Erasmus Medical Center                                          | Bas Oude Munnink et al | <a href="https://www.epicov.org/acknowledgement/35/13/EPI_ISL_523513.json">https://www.epicov.org/acknowledgement/35/13/EPI_ISL_523513.json</a>   |
| Netherlands/un-EMC-761/2020    | EPI_ISL_523517  | Dutch COVID-19 response team | Erasmus Medical Center                                          | Bas Oude Munnink et al | <a href="https://www.epicov.org/acknowledgement/35/17/EPI_ISL_523517.json">https://www.epicov.org/acknowledgement/35/17/EPI_ISL_523517.json</a>   |
| Netherlands/un-EMC-778/2020    | EPI_ISL_577874  | Dutch COVID-19 response team | Erasmus Medical Center                                          | Bas Oude Munnink et al | <a href="https://www.epicov.org/acknowledgement/78/74/EPI_ISL_577874.json">https://www.epicov.org/acknowledgement/78/74/EPI_ISL_577874.json</a>   |
| Netherlands/un-EMC-783/2020    | EPI_ISL_577879  | Dutch COVID-19 response team | Erasmus Medical Center                                          | Bas Oude Munnink et al | <a href="https://www.epicov.org/acknowledgement/78/79/EPI_ISL_577879.json">https://www.epicov.org/acknowledgement/78/79/EPI_ISL_577879.json</a>   |
| Netherlands/un-EMC-784/2020    | EPI_ISL_577880  | Dutch COVID-19 response team | Erasmus Medical Center                                          | Bas Oude Munnink et al | <a href="https://www.epicov.org/acknowledgement/78/80/EPI_ISL_577880.json">https://www.epicov.org/acknowledgement/78/80/EPI_ISL_577880.json</a>   |
| Netherlands/un-EMC-785/2020    | EPI_ISL_577881  | Dutch COVID-19 response team | Erasmus Medical Center                                          | Bas Oude Munnink et al | <a href="https://www.epicov.org/acknowledgement/78/81/EPI_ISL_577881.json">https://www.epicov.org/acknowledgement/78/81/EPI_ISL_577881.json</a>   |
| Netherlands/un-EMC-790/2020    | EPI_ISL_632352  | Dutch COVID-19 response team | Erasmus Medical Center                                          | Bas Oude Munnink et al | <a href="https://www.epicov.org/acknowledgement/23/52/EPI_ISL_632352.json">https://www.epicov.org/acknowledgement/23/52/EPI_ISL_632352.json</a>   |
| Netherlands/un-EMC-795/2020    | EPI_ISL_632776  | Dutch COVID-19 response team | Erasmus Medical Center                                          | Bas Oude Munnink et al | <a href="https://www.epicov.org/acknowledgement/27/76/EPI_ISL_632776.json">https://www.epicov.org/acknowledgement/27/76/EPI_ISL_632776.json</a>   |
| Netherlands/UT-EMC-104/2020    | EPI_ISL_632502  | Dutch COVID-19 response team | Erasmus Medical Center                                          | Bas Oude Munnink et al | <a href="https://www.epicov.org/acknowledgement/25/02/EPI_ISL_632502.json">https://www.epicov.org/acknowledgement/25/02/EPI_ISL_632502.json</a>   |

| seq_id                      | gisaid_epi_isl  | originating_lab              | submitting_lab         | authors                | url                                                                                                                                               |
|-----------------------------|-----------------|------------------------------|------------------------|------------------------|---------------------------------------------------------------------------------------------------------------------------------------------------|
| Netherlands/UT-EMC-105/2020 | EPI_ISL_632461  | Dutch COVID-19 response team | Erasmus Medical Center | Bas Oude Munnink et al | <a href="https://www.epicov.org/acknowledgement/24/61/EPI_ISL_632461.json">https://www.epicov.org/acknowledgement/24/61/EPI_ISL_632461.json</a>   |
| Netherlands/UT-EMC-109/2020 | EPI_ISL_632628  | Dutch COVID-19 response team | Erasmus Medical Center | Bas Oude Munnink et al | <a href="https://www.epicov.org/acknowledgement/26/28/EPI_ISL_632628.json">https://www.epicov.org/acknowledgement/26/28/EPI_ISL_632628.json</a>   |
| Netherlands/UT-EMC-111/2020 | EPI_ISL_632630  | Dutch COVID-19 response team | Erasmus Medical Center | Bas Oude Munnink et al | <a href="https://www.epicov.org/acknowledgement/26/30/EPI_ISL_632630.json">https://www.epicov.org/acknowledgement/26/30/EPI_ISL_632630.json</a>   |
| Netherlands/UT-EMC-112/2020 | EPI_ISL_632634  | Dutch COVID-19 response team | Erasmus Medical Center | Bas Oude Munnink et al | <a href="https://www.epicov.org/acknowledgement/26/34/EPI_ISL_632634.json">https://www.epicov.org/acknowledgement/26/34/EPI_ISL_632634.json</a>   |
| Netherlands/UT-EMC-113/2020 | EPI_ISL_632635  | Dutch COVID-19 response team | Erasmus Medical Center | Bas Oude Munnink et al | <a href="https://www.epicov.org/acknowledgement/26/35/EPI_ISL_632635.json">https://www.epicov.org/acknowledgement/26/35/EPI_ISL_632635.json</a>   |
| Netherlands/UT-EMC-115/2020 | EPI_ISL_632638  | Dutch COVID-19 response team | Erasmus Medical Center | Bas Oude Munnink et al | <a href="https://www.epicov.org/acknowledgement/26/38/EPI_ISL_632638.json">https://www.epicov.org/acknowledgement/26/38/EPI_ISL_632638.json</a>   |
| Netherlands/UT-EMC-117/2020 | EPI_ISL_632640  | Dutch COVID-19 response team | Erasmus Medical Center | Bas Oude Munnink et al | <a href="https://www.epicov.org/acknowledgement/26/40/EPI_ISL_632640.json">https://www.epicov.org/acknowledgement/26/40/EPI_ISL_632640.json</a>   |
| Netherlands/UT-EMC-118/2020 | EPI_ISL_632641  | Dutch COVID-19 response team | Erasmus Medical Center | Bas Oude Munnink et al | <a href="https://www.epicov.org/acknowledgement/26/41/EPI_ISL_632641.json">https://www.epicov.org/acknowledgement/26/41/EPI_ISL_632641.json</a>   |
| Netherlands/UT-EMC-119/2020 | EPI_ISL_632644  | Dutch COVID-19 response team | Erasmus Medical Center | Bas Oude Munnink et al | <a href="https://www.epicov.org/acknowledgement/26/44/EPI_ISL_632644.json">https://www.epicov.org/acknowledgement/26/44/EPI_ISL_632644.json</a>   |
| Netherlands/UT-EMC-123/2020 | EPI_ISL_632343  | Dutch COVID-19 response team | Erasmus Medical Center | Bas Oude Munnink et al | <a href="https://www.epicov.org/acknowledgement/23/43/EPI_ISL_632343.json">https://www.epicov.org/acknowledgement/23/43/EPI_ISL_632343.json</a>   |
| Netherlands/UT-EMC-124/2020 | EPI_ISL_632720  | Dutch COVID-19 response team | Erasmus Medical Center | Bas Oude Munnink et al | <a href="https://www.epicov.org/acknowledgement/27/20/EPI_ISL_632720.json">https://www.epicov.org/acknowledgement/27/20/EPI_ISL_632720.json</a>   |
| Netherlands/UT-EMC-128/2020 | EPI_ISL_632326  | Dutch COVID-19 response team | Erasmus Medical Center | Bas Oude Munnink et al | <a href="https://www.epicov.org/acknowledgement/23/26/EPI_ISL_632326.json">https://www.epicov.org/acknowledgement/23/26/EPI_ISL_632326.json</a>   |
| Netherlands/UT-EMC-130/2020 | EPI_ISL_632392  | Dutch COVID-19 response team | Erasmus Medical Center | Bas Oude Munnink et al | <a href="https://www.epicov.org/acknowledgement/23/92/EPI_ISL_632392.json">https://www.epicov.org/acknowledgement/23/92/EPI_ISL_632392.json</a>   |
| Netherlands/UT-EMC-131/2020 | EPI_ISL_632724  | Dutch COVID-19 response team | Erasmus Medical Center | Bas Oude Munnink et al | <a href="https://www.epicov.org/acknowledgement/27/24/EPI_ISL_632724.json">https://www.epicov.org/acknowledgement/27/24/EPI_ISL_632724.json</a>   |
| Netherlands/UT-EMC-135/2020 | EPI_ISL_632407  | Dutch COVID-19 response team | Erasmus Medical Center | Bas Oude Munnink et al | <a href="https://www.epicov.org/acknowledgement/24/07/EPI_ISL_632407.json">https://www.epicov.org/acknowledgement/24/07/EPI_ISL_632407.json</a>   |
| Netherlands/UT-EMC-142/2020 | EPI_ISL_632780  | Dutch COVID-19 response team | Erasmus Medical Center | Bas Oude Munnink et al | <a href="https://www.epicov.org/acknowledgement/27/80/EPI_ISL_632780.json">https://www.epicov.org/acknowledgement/27/80/EPI_ISL_632780.json</a>   |
| Netherlands/UT-EMC-157/2020 | EPI_ISL_722580  | Dutch COVID-19 response team | Erasmus Medical Center | Bas Oude Munnink et al | <a href="https://www.epicov.org/acknowledgement/25/80/EPI_ISL_722580.json">https://www.epicov.org/acknowledgement/25/80/EPI_ISL_722580.json</a>   |
| Netherlands/UT-EMC-190/2020 | EPI_ISL_722514  | Dutch COVID-19 response team | Erasmus Medical Center | Bas Oude Munnink et al | <a href="https://www.epicov.org/acknowledgement/25/14/EPI_ISL_722514.json">https://www.epicov.org/acknowledgement/25/14/EPI_ISL_722514.json</a>   |
| Netherlands/UT-EMC-191/2020 | EPI_ISL_722518  | Dutch COVID-19 response team | Erasmus Medical Center | Bas Oude Munnink et al | <a href="https://www.epicov.org/acknowledgement/25/18/EPI_ISL_722518.json">https://www.epicov.org/acknowledgement/25/18/EPI_ISL_722518.json</a>   |
| Netherlands/UT-EMC-333/2020 | EPI_ISL_1311053 | Dutch COVID-19 response team | Erasmus Medical Center | Bas Oude Munnink et al | <a href="https://www.epicov.org/acknowledgement/10/53/EPI_ISL_1311053.json">https://www.epicov.org/acknowledgement/10/53/EPI_ISL_1311053.json</a> |
| Netherlands/UT-EMC-54/2020  | EPI_ISL_523531  | Dutch COVID-19 response team | Erasmus Medical Center | Bas Oude Munnink et al | <a href="https://www.epicov.org/acknowledgement/35/31/EPI_ISL_523531.json">https://www.epicov.org/acknowledgement/35/31/EPI_ISL_523531.json</a>   |
| Netherlands/UT-EMC-55/2020  | EPI_ISL_523532  | Dutch COVID-19 response team | Erasmus Medical Center | Bas Oude Munnink et al | <a href="https://www.epicov.org/acknowledgement/35/32/EPI_ISL_523532.json">https://www.epicov.org/acknowledgement/35/32/EPI_ISL_523532.json</a>   |
| Netherlands/UT-EMC-56/2020  | EPI_ISL_523533  | Dutch COVID-19 response team | Erasmus Medical Center | Bas Oude Munnink et al | <a href="https://www.epicov.org/acknowledgement/35/33/EPI_ISL_523533.json">https://www.epicov.org/acknowledgement/35/33/EPI_ISL_523533.json</a>   |
| Netherlands/UT-EMC-58/2020  | EPI_ISL_523535  | Dutch COVID-19 response team | Erasmus Medical Center | Bas Oude Munnink et al | <a href="https://www.epicov.org/acknowledgement/35/35/EPI_ISL_523535.json">https://www.epicov.org/acknowledgement/35/35/EPI_ISL_523535.json</a>   |
| Netherlands/UT-EMC-59/2020  | EPI_ISL_523536  | Dutch COVID-19 response team | Erasmus Medical Center | Bas Oude Munnink et al | <a href="https://www.epicov.org/acknowledgement/35/36/EPI_ISL_523536.json">https://www.epicov.org/acknowledgement/35/36/EPI_ISL_523536.json</a>   |

| seq_id                         | gisaid_epi_isl | originating_lab              | submitting_lab                                                  | authors                | url                                                                                                                                             |
|--------------------------------|----------------|------------------------------|-----------------------------------------------------------------|------------------------|-------------------------------------------------------------------------------------------------------------------------------------------------|
| Netherlands/UT-EMC-61/2020     | EPI_ISL_523538 | Dutch COVID-19 response team | Erasmus Medical Center                                          | Bas Oude Munnink et al | <a href="https://www.epicov.org/acknowledgement/35/38/EPI_ISL_523538.json">https://www.epicov.org/acknowledgement/35/38/EPI_ISL_523538.json</a> |
| Netherlands/UT-EMC-62/2020     | EPI_ISL_523539 | Dutch COVID-19 response team | Erasmus Medical Center                                          | Bas Oude Munnink et al | <a href="https://www.epicov.org/acknowledgement/35/39/EPI_ISL_523539.json">https://www.epicov.org/acknowledgement/35/39/EPI_ISL_523539.json</a> |
| Netherlands/UT-EMC-63/2020     | EPI_ISL_523540 | Dutch COVID-19 response team | Erasmus Medical Center                                          | Bas Oude Munnink et al | <a href="https://www.epicov.org/acknowledgement/35/40/EPI_ISL_523540.json">https://www.epicov.org/acknowledgement/35/40/EPI_ISL_523540.json</a> |
| Netherlands/UT-EMC-64/2020     | EPI_ISL_523541 | Dutch COVID-19 response team | Erasmus Medical Center                                          | Bas Oude Munnink et al | <a href="https://www.epicov.org/acknowledgement/35/41/EPI_ISL_523541.json">https://www.epicov.org/acknowledgement/35/41/EPI_ISL_523541.json</a> |
| Netherlands/UT-EMC-66/2020     | EPI_ISL_523543 | Dutch COVID-19 response team | Erasmus Medical Center                                          | Bas Oude Munnink et al | <a href="https://www.epicov.org/acknowledgement/35/43/EPI_ISL_523543.json">https://www.epicov.org/acknowledgement/35/43/EPI_ISL_523543.json</a> |
| Netherlands/UT-EMC-70/2020     | EPI_ISL_577886 | Dutch COVID-19 response team | Erasmus Medical Center                                          | Bas Oude Munnink et al | <a href="https://www.epicov.org/acknowledgement/78/86/EPI_ISL_577886.json">https://www.epicov.org/acknowledgement/78/86/EPI_ISL_577886.json</a> |
| Netherlands/UT-EMC-72/2020     | EPI_ISL_577888 | Dutch COVID-19 response team | Erasmus Medical Center                                          | Bas Oude Munnink et al | <a href="https://www.epicov.org/acknowledgement/78/88/EPI_ISL_577888.json">https://www.epicov.org/acknowledgement/78/88/EPI_ISL_577888.json</a> |
| Netherlands/UT-EMC-73/2020     | EPI_ISL_577889 | Dutch COVID-19 response team | Erasmus Medical Center                                          | Bas Oude Munnink et al | <a href="https://www.epicov.org/acknowledgement/78/89/EPI_ISL_577889.json">https://www.epicov.org/acknowledgement/78/89/EPI_ISL_577889.json</a> |
| Netherlands/UT-EMC-75/2020     | EPI_ISL_577891 | Dutch COVID-19 response team | Erasmus Medical Center                                          | Bas Oude Munnink et al | <a href="https://www.epicov.org/acknowledgement/78/91/EPI_ISL_577891.json">https://www.epicov.org/acknowledgement/78/91/EPI_ISL_577891.json</a> |
| Netherlands/UT-EMC-76/2020     | EPI_ISL_577892 | Dutch COVID-19 response team | Erasmus Medical Center                                          | Bas Oude Munnink et al | <a href="https://www.epicov.org/acknowledgement/78/92/EPI_ISL_577892.json">https://www.epicov.org/acknowledgement/78/92/EPI_ISL_577892.json</a> |
| Netherlands/UT-EMC-77/2020     | EPI_ISL_577893 | Dutch COVID-19 response team | Erasmus Medical Center                                          | Bas Oude Munnink et al | <a href="https://www.epicov.org/acknowledgement/78/93/EPI_ISL_577893.json">https://www.epicov.org/acknowledgement/78/93/EPI_ISL_577893.json</a> |
| Netherlands/UT-EMC-78/2020     | EPI_ISL_577894 | Dutch COVID-19 response team | Erasmus Medical Center                                          | Bas Oude Munnink et al | <a href="https://www.epicov.org/acknowledgement/78/94/EPI_ISL_577894.json">https://www.epicov.org/acknowledgement/78/94/EPI_ISL_577894.json</a> |
| Netherlands/UT-EMC-83/2020     | EPI_ISL_577899 | Dutch COVID-19 response team | Erasmus Medical Center                                          | Bas Oude Munnink et al | <a href="https://www.epicov.org/acknowledgement/78/99/EPI_ISL_577899.json">https://www.epicov.org/acknowledgement/78/99/EPI_ISL_577899.json</a> |
| Netherlands/UT-EMC-87/2020     | EPI_ISL_577903 | Dutch COVID-19 response team | Erasmus Medical Center                                          | Bas Oude Munnink et al | <a href="https://www.epicov.org/acknowledgement/79/03/EPI_ISL_577903.json">https://www.epicov.org/acknowledgement/79/03/EPI_ISL_577903.json</a> |
| Netherlands/UT-EMC-88/2020     | EPI_ISL_577904 | Dutch COVID-19 response team | Erasmus Medical Center                                          | Bas Oude Munnink et al | <a href="https://www.epicov.org/acknowledgement/79/04/EPI_ISL_577904.json">https://www.epicov.org/acknowledgement/79/04/EPI_ISL_577904.json</a> |
| Netherlands/UT-EMC-93/2020     | EPI_ISL_632497 | Dutch COVID-19 response team | Erasmus Medical Center                                          | Bas Oude Munnink et al | <a href="https://www.epicov.org/acknowledgement/24/97/EPI_ISL_632497.json">https://www.epicov.org/acknowledgement/24/97/EPI_ISL_632497.json</a> |
| Netherlands/UT-EMC-98/2020     | EPI_ISL_632327 | Dutch COVID-19 response team | Erasmus Medical Center                                          | Bas Oude Munnink et al | <a href="https://www.epicov.org/acknowledgement/23/27/EPI_ISL_632327.json">https://www.epicov.org/acknowledgement/23/27/EPI_ISL_632327.json</a> |
| Netherlands/UT-EMC-99/2020     | EPI_ISL_632417 | Dutch COVID-19 response team | Erasmus Medical Center                                          | Bas Oude Munnink et al | <a href="https://www.epicov.org/acknowledgement/24/17/EPI_ISL_632417.json">https://www.epicov.org/acknowledgement/24/17/EPI_ISL_632417.json</a> |
| Netherlands/UT-RIVM-10349/2020 | EPI_ISL_636573 | Dutch COVID-19 response team | National Institute for Public Health and the Environment (RIVM) | Adam Meijer et al      | <a href="https://www.epicov.org/acknowledgement/65/73/EPI_ISL_636573.json">https://www.epicov.org/acknowledgement/65/73/EPI_ISL_636573.json</a> |
| Netherlands/UT-RIVM-10351/2020 | EPI_ISL_636575 | Dutch COVID-19 response team | National Institute for Public Health and the Environment (RIVM) | Adam Meijer et al      | <a href="https://www.epicov.org/acknowledgement/65/75/EPI_ISL_636575.json">https://www.epicov.org/acknowledgement/65/75/EPI_ISL_636575.json</a> |
| Netherlands/UT-RIVM-10369/2020 | EPI_ISL_636578 | Dutch COVID-19 response team | National Institute for Public Health and the Environment (RIVM) | Adam Meijer et al      | <a href="https://www.epicov.org/acknowledgement/65/78/EPI_ISL_636578.json">https://www.epicov.org/acknowledgement/65/78/EPI_ISL_636578.json</a> |
| Netherlands/UT-RIVM-10377/2020 | EPI_ISL_636579 | Dutch COVID-19 response team | National Institute for Public Health and the Environment (RIVM) | Adam Meijer et al      | <a href="https://www.epicov.org/acknowledgement/65/79/EPI_ISL_636579.json">https://www.epicov.org/acknowledgement/65/79/EPI_ISL_636579.json</a> |
| Netherlands/UT-RIVM-10384/2020 | EPI_ISL_636582 | Dutch COVID-19 response team | National Institute for Public Health and the Environment (RIVM) | Adam Meijer et al      | <a href="https://www.epicov.org/acknowledgement/65/82/EPI_ISL_636582.json">https://www.epicov.org/acknowledgement/65/82/EPI_ISL_636582.json</a> |
| Netherlands/UT-RIVM-10400/2020 | EPI_ISL_636583 | Dutch COVID-19 response team | National Institute for Public Health and the Environment (RIVM) | Adam Meijer et al      | <a href="https://www.epicov.org/acknowledgement/65/83/EPI_ISL_636583.json">https://www.epicov.org/acknowledgement/65/83/EPI_ISL_636583.json</a> |
| Netherlands/UT-RIVM-21469/2020 | EPI_ISL_905603 | Dutch COVID-19 response team | National Institute for Public Health and the Environment (RIVM) | Adam Meijer et al      | <a href="https://www.epicov.org/acknowledgement/56/03/EPI_ISL_905603.json">https://www.epicov.org/acknowledgement/56/03/EPI_ISL_905603.json</a> |

| seq_id                         | gisaid_epi_isl  | originating_lab              | submitting_lab                                                  | authors                | url                                                                                                                                               |
|--------------------------------|-----------------|------------------------------|-----------------------------------------------------------------|------------------------|---------------------------------------------------------------------------------------------------------------------------------------------------|
| Netherlands/UT-RIVM-21482/2020 | EPI_ISL_905655  | Dutch COVID-19 response team | National Institute for Public Health and the Environment (RIVM) | Adam Meijer et al      | <a href="https://www.epicov.org/acknowledgement/56/55/EPI_ISL_905655.json">https://www.epicov.org/acknowledgement/56/55/EPI_ISL_905655.json</a>   |
| Netherlands/UT-RIVM-21792/2020 | EPI_ISL_1498179 | Dutch COVID-19 response team | National Institute for Public Health and the Environment (RIVM) | Adam Meijer et al      | <a href="https://www.epicov.org/acknowledgement/81/79/EPI_ISL_1498179.json">https://www.epicov.org/acknowledgement/81/79/EPI_ISL_1498179.json</a> |
| Netherlands/Utrecht_48/2020    | EPI_ISL_461244  | Dutch COVID-19 response team | Erasmus Medical Center                                          | Bas Oude Munnink et al | <a href="https://www.epicov.org/acknowledgement/12/44/EPI_ISL_461244.json">https://www.epicov.org/acknowledgement/12/44/EPI_ISL_461244.json</a>   |
| Netherlands/ZE-EMC-105/2020    | EPI_ISL_1311667 | Dutch COVID-19 response team | Erasmus Medical Center                                          | Bas Oude Munnink et al | <a href="https://www.epicov.org/acknowledgement/16/67/EPI_ISL_1311667.json">https://www.epicov.org/acknowledgement/16/67/EPI_ISL_1311667.json</a> |
| Netherlands/ZE-EMC-53/2020     | EPI_ISL_523552  | Dutch COVID-19 response team | Erasmus Medical Center                                          | Bas Oude Munnink et al | <a href="https://www.epicov.org/acknowledgement/35/52/EPI_ISL_523552.json">https://www.epicov.org/acknowledgement/35/52/EPI_ISL_523552.json</a>   |
| Netherlands/ZE-EMC-54/2020     | EPI_ISL_523553  | Dutch COVID-19 response team | Erasmus Medical Center                                          | Bas Oude Munnink et al | <a href="https://www.epicov.org/acknowledgement/35/53/EPI_ISL_523553.json">https://www.epicov.org/acknowledgement/35/53/EPI_ISL_523553.json</a>   |
| Netherlands/ZE-EMC-55/2020     | EPI_ISL_523554  | Dutch COVID-19 response team | Erasmus Medical Center                                          | Bas Oude Munnink et al | <a href="https://www.epicov.org/acknowledgement/35/54/EPI_ISL_523554.json">https://www.epicov.org/acknowledgement/35/54/EPI_ISL_523554.json</a>   |
| Netherlands/ZE-EMC-56/2020     | EPI_ISL_523555  | Dutch COVID-19 response team | Erasmus Medical Center                                          | Bas Oude Munnink et al | <a href="https://www.epicov.org/acknowledgement/35/55/EPI_ISL_523555.json">https://www.epicov.org/acknowledgement/35/55/EPI_ISL_523555.json</a>   |
| Netherlands/ZE-EMC-82/2020     | EPI_ISL_722335  | Dutch COVID-19 response team | Erasmus Medical Center                                          | Bas Oude Munnink et al | <a href="https://www.epicov.org/acknowledgement/23/35/EPI_ISL_722335.json">https://www.epicov.org/acknowledgement/23/35/EPI_ISL_722335.json</a>   |
| Netherlands/ZE-RIVM-10296/2020 | EPI_ISL_636585  | Dutch COVID-19 response team | National Institute for Public Health and the Environment (RIVM) | Adam Meijer et al      | <a href="https://www.epicov.org/acknowledgement/65/85/EPI_ISL_636585.json">https://www.epicov.org/acknowledgement/65/85/EPI_ISL_636585.json</a>   |
| Netherlands/ZE-RIVM-10355/2020 | EPI_ISL_636587  | Dutch COVID-19 response team | National Institute for Public Health and the Environment (RIVM) | Adam Meijer et al      | <a href="https://www.epicov.org/acknowledgement/65/87/EPI_ISL_636587.json">https://www.epicov.org/acknowledgement/65/87/EPI_ISL_636587.json</a>   |
| Netherlands/ZE-RIVM-20013/2020 | EPI_ISL_723212  | Dutch COVID-19 response team | National Institute for Public Health and the Environment (RIVM) | Adam Meijer et al      | <a href="https://www.epicov.org/acknowledgement/32/12/EPI_ISL_723212.json">https://www.epicov.org/acknowledgement/32/12/EPI_ISL_723212.json</a>   |
| Netherlands/ZH-EMC-1002/2020   | EPI_ISL_722503  | Dutch COVID-19 response team | Erasmus Medical Center                                          | Bas Oude Munnink et al | <a href="https://www.epicov.org/acknowledgement/25/03/EPI_ISL_722503.json">https://www.epicov.org/acknowledgement/25/03/EPI_ISL_722503.json</a>   |
| Netherlands/ZH-EMC-1040/2020   | EPI_ISL_722319  | Dutch COVID-19 response team | Erasmus Medical Center                                          | Bas Oude Munnink et al | <a href="https://www.epicov.org/acknowledgement/23/19/EPI_ISL_722319.json">https://www.epicov.org/acknowledgement/23/19/EPI_ISL_722319.json</a>   |
| Netherlands/ZH-EMC-1049/2020   | EPI_ISL_722547  | Dutch COVID-19 response team | Erasmus Medical Center                                          | Bas Oude Munnink et al | <a href="https://www.epicov.org/acknowledgement/25/47/EPI_ISL_722547.json">https://www.epicov.org/acknowledgement/25/47/EPI_ISL_722547.json</a>   |
| Netherlands/ZH-EMC-1058/2020   | EPI_ISL_722349  | Dutch COVID-19 response team | Erasmus Medical Center                                          | Bas Oude Munnink et al | <a href="https://www.epicov.org/acknowledgement/23/49/EPI_ISL_722349.json">https://www.epicov.org/acknowledgement/23/49/EPI_ISL_722349.json</a>   |
| Netherlands/ZH-EMC-1067/2020   | EPI_ISL_722493  | Dutch COVID-19 response team | Erasmus Medical Center                                          | Bas Oude Munnink et al | <a href="https://www.epicov.org/acknowledgement/24/93/EPI_ISL_722493.json">https://www.epicov.org/acknowledgement/24/93/EPI_ISL_722493.json</a>   |
| Netherlands/ZH-EMC-1070/2020   | EPI_ISL_722307  | Dutch COVID-19 response team | Erasmus Medical Center                                          | Bas Oude Munnink et al | <a href="https://www.epicov.org/acknowledgement/23/07/EPI_ISL_722307.json">https://www.epicov.org/acknowledgement/23/07/EPI_ISL_722307.json</a>   |
| Netherlands/ZH-EMC-1237/2020   | EPI_ISL_763306  | Dutch COVID-19 response team | Erasmus Medical Center                                          | Bas Oude Munnink et al | <a href="https://www.epicov.org/acknowledgement/33/06/EPI_ISL_763306.json">https://www.epicov.org/acknowledgement/33/06/EPI_ISL_763306.json</a>   |
| Netherlands/ZH-EMC-1348/2020   | EPI_ISL_904421  | Dutch COVID-19 response team | Erasmus Medical Center                                          | Bas Oude Munnink et al | <a href="https://www.epicov.org/acknowledgement/44/21/EPI_ISL_904421.json">https://www.epicov.org/acknowledgement/44/21/EPI_ISL_904421.json</a>   |
| Netherlands/ZH-EMC-1351/2020   | EPI_ISL_904423  | Dutch COVID-19 response team | Erasmus Medical Center                                          | Bas Oude Munnink et al | <a href="https://www.epicov.org/acknowledgement/44/23/EPI_ISL_904423.json">https://www.epicov.org/acknowledgement/44/23/EPI_ISL_904423.json</a>   |
| Netherlands/ZH-EMC-1353/2020   | EPI_ISL_904425  | Dutch COVID-19 response team | Erasmus Medical Center                                          | Bas Oude Munnink et al | <a href="https://www.epicov.org/acknowledgement/44/25/EPI_ISL_904425.json">https://www.epicov.org/acknowledgement/44/25/EPI_ISL_904425.json</a>   |
| Netherlands/ZH-EMC-1817/2020   | EPI_ISL_1311717 | Dutch COVID-19 response team | Erasmus Medical Center                                          | Bas Oude Munnink et al | <a href="https://www.epicov.org/acknowledgement/17/17/EPI_ISL_1311717.json">https://www.epicov.org/acknowledgement/17/17/EPI_ISL_1311717.json</a> |
| Netherlands/ZH-EMC-1818/2020   | EPI_ISL_1311718 | Dutch COVID-19 response team | Erasmus Medical Center                                          | Bas Oude Munnink et al | <a href="https://www.epicov.org/acknowledgement/17/18/EPI_ISL_1311718.json">https://www.epicov.org/acknowledgement/17/18/EPI_ISL_1311718.json</a> |
| Netherlands/ZH-EMC-1820/2020   | EPI_ISL_1311720 | Dutch COVID-19 response team | Erasmus Medical Center                                          | Bas Oude Munnink et al | <a href="https://www.epicov.org/acknowledgement/17/20/EPI_ISL_1311720.json">https://www.epicov.org/acknowledgement/17/20/EPI_ISL_1311720.json</a> |

| seq_id                       | gisaid_epi_isl  | originating_lab              | submitting_lab         | authors                | url                                                                                                                                               |
|------------------------------|-----------------|------------------------------|------------------------|------------------------|---------------------------------------------------------------------------------------------------------------------------------------------------|
| Netherlands/ZH-EMC-1821/2020 | EPI_ISL_1310994 | Dutch COVID-19 response team | Erasmus Medical Center | Bas Oude Munnink et al | <a href="https://www.epicov.org/acknowledgement/09/94/EPI_ISL_1310994.json">https://www.epicov.org/acknowledgement/09/94/EPI_ISL_1310994.json</a> |
| Netherlands/ZH-EMC-1822/2020 | EPI_ISL_1321997 | Dutch COVID-19 response team | Erasmus Medical Center | Bas Oude Munnink et al | <a href="https://www.epicov.org/acknowledgement/19/97/EPI_ISL_1321997.json">https://www.epicov.org/acknowledgement/19/97/EPI_ISL_1321997.json</a> |
| Netherlands/ZH-EMC-1823/2020 | EPI_ISL_1311276 | Dutch COVID-19 response team | Erasmus Medical Center | Bas Oude Munnink et al | <a href="https://www.epicov.org/acknowledgement/12/76/EPI_ISL_1311276.json">https://www.epicov.org/acknowledgement/12/76/EPI_ISL_1311276.json</a> |
| Netherlands/ZH-EMC-1863/2020 | EPI_ISL_1311776 | Dutch COVID-19 response team | Erasmus Medical Center | Bas Oude Munnink et al | <a href="https://www.epicov.org/acknowledgement/17/76/EPI_ISL_1311776.json">https://www.epicov.org/acknowledgement/17/76/EPI_ISL_1311776.json</a> |
| Netherlands/ZH-EMC-1914/2020 | EPI_ISL_1311786 | Dutch COVID-19 response team | Erasmus Medical Center | Bas Oude Munnink et al | <a href="https://www.epicov.org/acknowledgement/17/86/EPI_ISL_1311786.json">https://www.epicov.org/acknowledgement/17/86/EPI_ISL_1311786.json</a> |
| Netherlands/ZH-EMC-1924/2020 | EPI_ISL_1311208 | Dutch COVID-19 response team | Erasmus Medical Center | Bas Oude Munnink et al | <a href="https://www.epicov.org/acknowledgement/12/08/EPI_ISL_1311208.json">https://www.epicov.org/acknowledgement/12/08/EPI_ISL_1311208.json</a> |
| Netherlands/ZH-EMC-1928/2020 | EPI_ISL_1310882 | Dutch COVID-19 response team | Erasmus Medical Center | Bas Oude Munnink et al | <a href="https://www.epicov.org/acknowledgement/08/82/EPI_ISL_1310882.json">https://www.epicov.org/acknowledgement/08/82/EPI_ISL_1310882.json</a> |
| Netherlands/ZH-EMC-1932/2020 | EPI_ISL_1311795 | Dutch COVID-19 response team | Erasmus Medical Center | Bas Oude Munnink et al | <a href="https://www.epicov.org/acknowledgement/17/95/EPI_ISL_1311795.json">https://www.epicov.org/acknowledgement/17/95/EPI_ISL_1311795.json</a> |
| Netherlands/ZH-EMC-1933/2020 | EPI_ISL_1311090 | Dutch COVID-19 response team | Erasmus Medical Center | Bas Oude Munnink et al | <a href="https://www.epicov.org/acknowledgement/10/90/EPI_ISL_1311090.json">https://www.epicov.org/acknowledgement/10/90/EPI_ISL_1311090.json</a> |
| Netherlands/ZH-EMC-1936/2020 | EPI_ISL_1310928 | Dutch COVID-19 response team | Erasmus Medical Center | Bas Oude Munnink et al | <a href="https://www.epicov.org/acknowledgement/09/28/EPI_ISL_1310928.json">https://www.epicov.org/acknowledgement/09/28/EPI_ISL_1310928.json</a> |
| Netherlands/ZH-EMC-1938/2020 | EPI_ISL_1311292 | Dutch COVID-19 response team | Erasmus Medical Center | Bas Oude Munnink et al | <a href="https://www.epicov.org/acknowledgement/12/92/EPI_ISL_1311292.json">https://www.epicov.org/acknowledgement/12/92/EPI_ISL_1311292.json</a> |
| Netherlands/ZH-EMC-1947/2020 | EPI_ISL_1311801 | Dutch COVID-19 response team | Erasmus Medical Center | Bas Oude Munnink et al | <a href="https://www.epicov.org/acknowledgement/18/01/EPI_ISL_1311801.json">https://www.epicov.org/acknowledgement/18/01/EPI_ISL_1311801.json</a> |
| Netherlands/ZH-EMC-1949/2020 | EPI_ISL_1310833 | Dutch COVID-19 response team | Erasmus Medical Center | Bas Oude Munnink et al | <a href="https://www.epicov.org/acknowledgement/08/33/EPI_ISL_1310833.json">https://www.epicov.org/acknowledgement/08/33/EPI_ISL_1310833.json</a> |
| Netherlands/ZH-EMC-1950/2020 | EPI_ISL_1310860 | Dutch COVID-19 response team | Erasmus Medical Center | Bas Oude Munnink et al | <a href="https://www.epicov.org/acknowledgement/08/60/EPI_ISL_1310860.json">https://www.epicov.org/acknowledgement/08/60/EPI_ISL_1310860.json</a> |
| Netherlands/ZH-EMC-1951/2020 | EPI_ISL_1311224 | Dutch COVID-19 response team | Erasmus Medical Center | Bas Oude Munnink et al | <a href="https://www.epicov.org/acknowledgement/12/24/EPI_ISL_1311224.json">https://www.epicov.org/acknowledgement/12/24/EPI_ISL_1311224.json</a> |
| Netherlands/ZH-EMC-1952/2020 | EPI_ISL_1310840 | Dutch COVID-19 response team | Erasmus Medical Center | Bas Oude Munnink et al | <a href="https://www.epicov.org/acknowledgement/08/40/EPI_ISL_1310840.json">https://www.epicov.org/acknowledgement/08/40/EPI_ISL_1310840.json</a> |
| Netherlands/ZH-EMC-1998/2020 | EPI_ISL_1311263 | Dutch COVID-19 response team | Erasmus Medical Center | Bas Oude Munnink et al | <a href="https://www.epicov.org/acknowledgement/12/63/EPI_ISL_1311263.json">https://www.epicov.org/acknowledgement/12/63/EPI_ISL_1311263.json</a> |
| Netherlands/ZH-EMC-1999/2020 | EPI_ISL_1311234 | Dutch COVID-19 response team | Erasmus Medical Center | Bas Oude Munnink et al | <a href="https://www.epicov.org/acknowledgement/12/34/EPI_ISL_1311234.json">https://www.epicov.org/acknowledgement/12/34/EPI_ISL_1311234.json</a> |
| Netherlands/ZH-EMC-227/2020  | EPI_ISL_523569  | Dutch COVID-19 response team | Erasmus Medical Center | Bas Oude Munnink et al | <a href="https://www.epicov.org/acknowledgement/35/69/EPI_ISL_523569.json">https://www.epicov.org/acknowledgement/35/69/EPI_ISL_523569.json</a>   |
| Netherlands/ZH-EMC-228/2020  | EPI_ISL_523570  | Dutch COVID-19 response team | Erasmus Medical Center | Bas Oude Munnink et al | <a href="https://www.epicov.org/acknowledgement/35/70/EPI_ISL_523570.json">https://www.epicov.org/acknowledgement/35/70/EPI_ISL_523570.json</a>   |
| Netherlands/ZH-EMC-234/2020  | EPI_ISL_523576  | Dutch COVID-19 response team | Erasmus Medical Center | Bas Oude Munnink et al | <a href="https://www.epicov.org/acknowledgement/35/76/EPI_ISL_523576.json">https://www.epicov.org/acknowledgement/35/76/EPI_ISL_523576.json</a>   |
| Netherlands/ZH-EMC-236/2020  | EPI_ISL_523578  | Dutch COVID-19 response team | Erasmus Medical Center | Bas Oude Munnink et al | <a href="https://www.epicov.org/acknowledgement/35/78/EPI_ISL_523578.json">https://www.epicov.org/acknowledgement/35/78/EPI_ISL_523578.json</a>   |
| Netherlands/ZH-EMC-2383/2020 | EPI_ISL_2145462 | Dutch COVID-19 response team | Erasmus Medical Center | Bas Oude Munnink et al | <a href="https://www.epicov.org/acknowledgement/54/62/EPI_ISL_2145462.json">https://www.epicov.org/acknowledgement/54/62/EPI_ISL_2145462.json</a> |
| Netherlands/ZH-EMC-2385/2020 | EPI_ISL_2145466 | Dutch COVID-19 response team | Erasmus Medical Center | Bas Oude Munnink et al | <a href="https://www.epicov.org/acknowledgement/54/66/EPI_ISL_2145466.json">https://www.epicov.org/acknowledgement/54/66/EPI_ISL_2145466.json</a> |
| Netherlands/ZH-EMC-2387/2020 | EPI_ISL_2145469 | Dutch COVID-19 response team | Erasmus Medical Center | Bas Oude Munnink et al | <a href="https://www.epicov.org/acknowledgement/54/69/EPI_ISL_2145469.json">https://www.epicov.org/acknowledgement/54/69/EPI_ISL_2145469.json</a> |

| seq_id                       | gisaid_epi_isl  | originating_lab              | submitting_lab         | authors                | url                                                                                                                                               |
|------------------------------|-----------------|------------------------------|------------------------|------------------------|---------------------------------------------------------------------------------------------------------------------------------------------------|
| Netherlands/ZH-EMC-2395/2020 | EPI_ISL_2145484 | Dutch COVID-19 response team | Erasmus Medical Center | Bas Oude Munnink et al | <a href="https://www.epicov.org/acknowledgement/54/84/EPI_ISL_2145484.json">https://www.epicov.org/acknowledgement/54/84/EPI_ISL_2145484.json</a> |
| Netherlands/ZH-EMC-2396/2020 | EPI_ISL_2145486 | Dutch COVID-19 response team | Erasmus Medical Center | Bas Oude Munnink et al | <a href="https://www.epicov.org/acknowledgement/54/86/EPI_ISL_2145486.json">https://www.epicov.org/acknowledgement/54/86/EPI_ISL_2145486.json</a> |
| Netherlands/ZH-EMC-2397/2020 | EPI_ISL_2145488 | Dutch COVID-19 response team | Erasmus Medical Center | Bas Oude Munnink et al | <a href="https://www.epicov.org/acknowledgement/54/88/EPI_ISL_2145488.json">https://www.epicov.org/acknowledgement/54/88/EPI_ISL_2145488.json</a> |
| Netherlands/ZH-EMC-2428/2020 | EPI_ISL_2145529 | Dutch COVID-19 response team | Erasmus Medical Center | Bas Oude Munnink et al | <a href="https://www.epicov.org/acknowledgement/55/29/EPI_ISL_2145529.json">https://www.epicov.org/acknowledgement/55/29/EPI_ISL_2145529.json</a> |
| Netherlands/ZH-EMC-2429/2020 | EPI_ISL_2145531 | Dutch COVID-19 response team | Erasmus Medical Center | Bas Oude Munnink et al | <a href="https://www.epicov.org/acknowledgement/55/31/EPI_ISL_2145531.json">https://www.epicov.org/acknowledgement/55/31/EPI_ISL_2145531.json</a> |
| Netherlands/ZH-EMC-2483/2020 | EPI_ISL_2145567 | Dutch COVID-19 response team | Erasmus Medical Center | Bas Oude Munnink et al | <a href="https://www.epicov.org/acknowledgement/55/67/EPI_ISL_2145567.json">https://www.epicov.org/acknowledgement/55/67/EPI_ISL_2145567.json</a> |
| Netherlands/ZH-EMC-2484/2020 | EPI_ISL_2145569 | Dutch COVID-19 response team | Erasmus Medical Center | Bas Oude Munnink et al | <a href="https://www.epicov.org/acknowledgement/55/69/EPI_ISL_2145569.json">https://www.epicov.org/acknowledgement/55/69/EPI_ISL_2145569.json</a> |
| Netherlands/ZH-EMC-2486/2020 | EPI_ISL_2145572 | Dutch COVID-19 response team | Erasmus Medical Center | Bas Oude Munnink et al | <a href="https://www.epicov.org/acknowledgement/55/72/EPI_ISL_2145572.json">https://www.epicov.org/acknowledgement/55/72/EPI_ISL_2145572.json</a> |
| Netherlands/ZH-EMC-2492/2020 | EPI_ISL_2145582 | Dutch COVID-19 response team | Erasmus Medical Center | Bas Oude Munnink et al | <a href="https://www.epicov.org/acknowledgement/55/82/EPI_ISL_2145582.json">https://www.epicov.org/acknowledgement/55/82/EPI_ISL_2145582.json</a> |
| Netherlands/ZH-EMC-2493/2020 | EPI_ISL_2145583 | Dutch COVID-19 response team | Erasmus Medical Center | Bas Oude Munnink et al | <a href="https://www.epicov.org/acknowledgement/55/83/EPI_ISL_2145583.json">https://www.epicov.org/acknowledgement/55/83/EPI_ISL_2145583.json</a> |
| Netherlands/ZH-EMC-255/2020  | EPI_ISL_523597  | Dutch COVID-19 response team | Erasmus Medical Center | Bas Oude Munnink et al | <a href="https://www.epicov.org/acknowledgement/35/97/EPI_ISL_523597.json">https://www.epicov.org/acknowledgement/35/97/EPI_ISL_523597.json</a>   |
| Netherlands/ZH-EMC-257/2020  | EPI_ISL_523599  | Dutch COVID-19 response team | Erasmus Medical Center | Bas Oude Munnink et al | <a href="https://www.epicov.org/acknowledgement/35/99/EPI_ISL_523599.json">https://www.epicov.org/acknowledgement/35/99/EPI_ISL_523599.json</a>   |
| Netherlands/ZH-EMC-258/2020  | EPI_ISL_523600  | Dutch COVID-19 response team | Erasmus Medical Center | Bas Oude Munnink et al | <a href="https://www.epicov.org/acknowledgement/36/00/EPI_ISL_523600.json">https://www.epicov.org/acknowledgement/36/00/EPI_ISL_523600.json</a>   |
| Netherlands/ZH-EMC-2603/2020 | EPI_ISL_2145705 | Dutch COVID-19 response team | Erasmus Medical Center | Bas Oude Munnink et al | <a href="https://www.epicov.org/acknowledgement/57/05/EPI_ISL_2145705.json">https://www.epicov.org/acknowledgement/57/05/EPI_ISL_2145705.json</a> |
| Netherlands/ZH-EMC-2604/2020 | EPI_ISL_2145707 | Dutch COVID-19 response team | Erasmus Medical Center | Bas Oude Munnink et al | <a href="https://www.epicov.org/acknowledgement/57/07/EPI_ISL_2145707.json">https://www.epicov.org/acknowledgement/57/07/EPI_ISL_2145707.json</a> |
| Netherlands/ZH-EMC-2607/2020 | EPI_ISL_2145712 | Dutch COVID-19 response team | Erasmus Medical Center | Bas Oude Munnink et al | <a href="https://www.epicov.org/acknowledgement/57/12/EPI_ISL_2145712.json">https://www.epicov.org/acknowledgement/57/12/EPI_ISL_2145712.json</a> |
| Netherlands/ZH-EMC-264/2020  | EPI_ISL_523606  | Dutch COVID-19 response team | Erasmus Medical Center | Bas Oude Munnink et al | <a href="https://www.epicov.org/acknowledgement/36/06/EPI_ISL_523606.json">https://www.epicov.org/acknowledgement/36/06/EPI_ISL_523606.json</a>   |
| Netherlands/ZH-EMC-2640/2020 | EPI_ISL_2145746 | Dutch COVID-19 response team | Erasmus Medical Center | Bas Oude Munnink et al | <a href="https://www.epicov.org/acknowledgement/57/46/EPI_ISL_2145746.json">https://www.epicov.org/acknowledgement/57/46/EPI_ISL_2145746.json</a> |
| Netherlands/ZH-EMC-2642/2020 | EPI_ISL_2145751 | Dutch COVID-19 response team | Erasmus Medical Center | Bas Oude Munnink et al | <a href="https://www.epicov.org/acknowledgement/57/51/EPI_ISL_2145751.json">https://www.epicov.org/acknowledgement/57/51/EPI_ISL_2145751.json</a> |
| Netherlands/ZH-EMC-2643/2020 | EPI_ISL_2145752 | Dutch COVID-19 response team | Erasmus Medical Center | Bas Oude Munnink et al | <a href="https://www.epicov.org/acknowledgement/57/52/EPI_ISL_2145752.json">https://www.epicov.org/acknowledgement/57/52/EPI_ISL_2145752.json</a> |
| Netherlands/ZH-EMC-2644/2020 | EPI_ISL_2145754 | Dutch COVID-19 response team | Erasmus Medical Center | Bas Oude Munnink et al | <a href="https://www.epicov.org/acknowledgement/57/54/EPI_ISL_2145754.json">https://www.epicov.org/acknowledgement/57/54/EPI_ISL_2145754.json</a> |
| Netherlands/ZH-EMC-2645/2020 | EPI_ISL_2145755 | Dutch COVID-19 response team | Erasmus Medical Center | Bas Oude Munnink et al | <a href="https://www.epicov.org/acknowledgement/57/55/EPI_ISL_2145755.json">https://www.epicov.org/acknowledgement/57/55/EPI_ISL_2145755.json</a> |
| Netherlands/ZH-EMC-2647/2020 | EPI_ISL_2145759 | Dutch COVID-19 response team | Erasmus Medical Center | Bas Oude Munnink et al | <a href="https://www.epicov.org/acknowledgement/57/59/EPI_ISL_2145759.json">https://www.epicov.org/acknowledgement/57/59/EPI_ISL_2145759.json</a> |
| Netherlands/ZH-EMC-268/2020  | EPI_ISL_523610  | Dutch COVID-19 response team | Erasmus Medical Center | Bas Oude Munnink et al | <a href="https://www.epicov.org/acknowledgement/36/10/EPI_ISL_523610.json">https://www.epicov.org/acknowledgement/36/10/EPI_ISL_523610.json</a>   |
| Netherlands/ZH-EMC-271/2020  | EPI_ISL_523613  | Dutch COVID-19 response team | Erasmus Medical Center | Bas Oude Munnink et al | <a href="https://www.epicov.org/acknowledgement/36/13/EPI_ISL_523613.json">https://www.epicov.org/acknowledgement/36/13/EPI_ISL_523613.json</a>   |

| seq_id                       | gisaid_epi_isl  | originating_lab              | submitting_lab         | authors                | url                                                                                                                                               |
|------------------------------|-----------------|------------------------------|------------------------|------------------------|---------------------------------------------------------------------------------------------------------------------------------------------------|
| Netherlands/ZH-EMC-274/2020  | EPI_ISL_523616  | Dutch COVID-19 response team | Erasmus Medical Center | Bas Oude Munnink et al | <a href="https://www.epicov.org/acknowledgement/36/16/EPI_ISL_523616.json">https://www.epicov.org/acknowledgement/36/16/EPI_ISL_523616.json</a>   |
| Netherlands/ZH-EMC-275/2020  | EPI_ISL_523617  | Dutch COVID-19 response team | Erasmus Medical Center | Bas Oude Munnink et al | <a href="https://www.epicov.org/acknowledgement/36/17/EPI_ISL_523617.json">https://www.epicov.org/acknowledgement/36/17/EPI_ISL_523617.json</a>   |
| Netherlands/ZH-EMC-276/2020  | EPI_ISL_523618  | Dutch COVID-19 response team | Erasmus Medical Center | Bas Oude Munnink et al | <a href="https://www.epicov.org/acknowledgement/36/18/EPI_ISL_523618.json">https://www.epicov.org/acknowledgement/36/18/EPI_ISL_523618.json</a>   |
| Netherlands/ZH-EMC-279/2020  | EPI_ISL_523621  | Dutch COVID-19 response team | Erasmus Medical Center | Bas Oude Munnink et al | <a href="https://www.epicov.org/acknowledgement/36/21/EPI_ISL_523621.json">https://www.epicov.org/acknowledgement/36/21/EPI_ISL_523621.json</a>   |
| Netherlands/ZH-EMC-280/2020  | EPI_ISL_523622  | Dutch COVID-19 response team | Erasmus Medical Center | Bas Oude Munnink et al | <a href="https://www.epicov.org/acknowledgement/36/22/EPI_ISL_523622.json">https://www.epicov.org/acknowledgement/36/22/EPI_ISL_523622.json</a>   |
| Netherlands/ZH-EMC-284/2020  | EPI_ISL_523626  | Dutch COVID-19 response team | Erasmus Medical Center | Bas Oude Munnink et al | <a href="https://www.epicov.org/acknowledgement/36/26/EPI_ISL_523626.json">https://www.epicov.org/acknowledgement/36/26/EPI_ISL_523626.json</a>   |
| Netherlands/ZH-EMC-2845/2020 | EPI_ISL_2860479 | Dutch COVID-19 response team | Erasmus Medical Center | Bas Oude Munnink et al | <a href="https://www.epicov.org/acknowledgement/04/79/EPI_ISL_2860479.json">https://www.epicov.org/acknowledgement/04/79/EPI_ISL_2860479.json</a> |
| Netherlands/ZH-EMC-285/2020  | EPI_ISL_523627  | Dutch COVID-19 response team | Erasmus Medical Center | Bas Oude Munnink et al | <a href="https://www.epicov.org/acknowledgement/36/27/EPI_ISL_523627.json">https://www.epicov.org/acknowledgement/36/27/EPI_ISL_523627.json</a>   |
| Netherlands/ZH-EMC-289/2020  | EPI_ISL_523631  | Dutch COVID-19 response team | Erasmus Medical Center | Bas Oude Munnink et al | <a href="https://www.epicov.org/acknowledgement/36/31/EPI_ISL_523631.json">https://www.epicov.org/acknowledgement/36/31/EPI_ISL_523631.json</a>   |
| Netherlands/ZH-EMC-2944/2020 | EPI_ISL_2860606 | Dutch COVID-19 response team | Erasmus Medical Center | Bas Oude Munnink et al | <a href="https://www.epicov.org/acknowledgement/06/06/EPI_ISL_2860606.json">https://www.epicov.org/acknowledgement/06/06/EPI_ISL_2860606.json</a> |
| Netherlands/ZH-EMC-296/2020  | EPI_ISL_523638  | Dutch COVID-19 response team | Erasmus Medical Center | Bas Oude Munnink et al | <a href="https://www.epicov.org/acknowledgement/36/38/EPI_ISL_523638.json">https://www.epicov.org/acknowledgement/36/38/EPI_ISL_523638.json</a>   |
| Netherlands/ZH-EMC-302/2020  | EPI_ISL_523644  | Dutch COVID-19 response team | Erasmus Medical Center | Bas Oude Munnink et al | <a href="https://www.epicov.org/acknowledgement/36/44/EPI_ISL_523644.json">https://www.epicov.org/acknowledgement/36/44/EPI_ISL_523644.json</a>   |
| Netherlands/ZH-EMC-307/2020  | EPI_ISL_523649  | Dutch COVID-19 response team | Erasmus Medical Center | Bas Oude Munnink et al | <a href="https://www.epicov.org/acknowledgement/36/49/EPI_ISL_523649.json">https://www.epicov.org/acknowledgement/36/49/EPI_ISL_523649.json</a>   |
| Netherlands/ZH-EMC-312/2020  | EPI_ISL_523654  | Dutch COVID-19 response team | Erasmus Medical Center | Bas Oude Munnink et al | <a href="https://www.epicov.org/acknowledgement/36/54/EPI_ISL_523654.json">https://www.epicov.org/acknowledgement/36/54/EPI_ISL_523654.json</a>   |
| Netherlands/ZH-EMC-317/2020  | EPI_ISL_523659  | Dutch COVID-19 response team | Erasmus Medical Center | Bas Oude Munnink et al | <a href="https://www.epicov.org/acknowledgement/36/59/EPI_ISL_523659.json">https://www.epicov.org/acknowledgement/36/59/EPI_ISL_523659.json</a>   |
| Netherlands/ZH-EMC-321/2020  | EPI_ISL_523662  | Dutch COVID-19 response team | Erasmus Medical Center | Bas Oude Munnink et al | <a href="https://www.epicov.org/acknowledgement/36/62/EPI_ISL_523662.json">https://www.epicov.org/acknowledgement/36/62/EPI_ISL_523662.json</a>   |
| Netherlands/ZH-EMC-324/2020  | EPI_ISL_523665  | Dutch COVID-19 response team | Erasmus Medical Center | Bas Oude Munnink et al | <a href="https://www.epicov.org/acknowledgement/36/65/EPI_ISL_523665.json">https://www.epicov.org/acknowledgement/36/65/EPI_ISL_523665.json</a>   |
| Netherlands/ZH-EMC-331/2020  | EPI_ISL_523672  | Dutch COVID-19 response team | Erasmus Medical Center | Bas Oude Munnink et al | <a href="https://www.epicov.org/acknowledgement/36/72/EPI_ISL_523672.json">https://www.epicov.org/acknowledgement/36/72/EPI_ISL_523672.json</a>   |
| Netherlands/ZH-EMC-337/2020  | EPI_ISL_523678  | Dutch COVID-19 response team | Erasmus Medical Center | Bas Oude Munnink et al | <a href="https://www.epicov.org/acknowledgement/36/78/EPI_ISL_523678.json">https://www.epicov.org/acknowledgement/36/78/EPI_ISL_523678.json</a>   |
| Netherlands/ZH-EMC-339/2020  | EPI_ISL_523680  | Dutch COVID-19 response team | Erasmus Medical Center | Bas Oude Munnink et al | <a href="https://www.epicov.org/acknowledgement/36/80/EPI_ISL_523680.json">https://www.epicov.org/acknowledgement/36/80/EPI_ISL_523680.json</a>   |
| Netherlands/ZH-EMC-341/2020  | EPI_ISL_523682  | Dutch COVID-19 response team | Erasmus Medical Center | Bas Oude Munnink et al | <a href="https://www.epicov.org/acknowledgement/36/82/EPI_ISL_523682.json">https://www.epicov.org/acknowledgement/36/82/EPI_ISL_523682.json</a>   |
| Netherlands/ZH-EMC-342/2020  | EPI_ISL_523683  | Dutch COVID-19 response team | Erasmus Medical Center | Bas Oude Munnink et al | <a href="https://www.epicov.org/acknowledgement/36/83/EPI_ISL_523683.json">https://www.epicov.org/acknowledgement/36/83/EPI_ISL_523683.json</a>   |
| Netherlands/ZH-EMC-343/2020  | EPI_ISL_523684  | Dutch COVID-19 response team | Erasmus Medical Center | Bas Oude Munnink et al | <a href="https://www.epicov.org/acknowledgement/36/84/EPI_ISL_523684.json">https://www.epicov.org/acknowledgement/36/84/EPI_ISL_523684.json</a>   |
| Netherlands/ZH-EMC-344/2020  | EPI_ISL_523685  | Dutch COVID-19 response team | Erasmus Medical Center | Bas Oude Munnink et al | <a href="https://www.epicov.org/acknowledgement/36/85/EPI_ISL_523685.json">https://www.epicov.org/acknowledgement/36/85/EPI_ISL_523685.json</a>   |
| Netherlands/ZH-EMC-345/2020  | EPI_ISL_523686  | Dutch COVID-19 response team | Erasmus Medical Center | Bas Oude Munnink et al | <a href="https://www.epicov.org/acknowledgement/36/86/EPI_ISL_523686.json">https://www.epicov.org/acknowledgement/36/86/EPI_ISL_523686.json</a>   |



| seq_id                      | gisaid_epi_isl | originating_lab              | submitting_lab         | authors                | url                                                                                                                                             |
|-----------------------------|----------------|------------------------------|------------------------|------------------------|-------------------------------------------------------------------------------------------------------------------------------------------------|
| Netherlands/ZH-EMC-348/2020 | EPI_ISL_523689 | Dutch COVID-19 response team | Erasmus Medical Center | Bas Oude Munnink et al | <a href="https://www.epicov.org/acknowledgement/36/89/EPI_ISL_523689.json">https://www.epicov.org/acknowledgement/36/89/EPI_ISL_523689.json</a> |
| Netherlands/ZH-EMC-350/2020 | EPI_ISL_523691 | Dutch COVID-19 response team | Erasmus Medical Center | Bas Oude Munnink et al | <a href="https://www.epicov.org/acknowledgement/36/91/EPI_ISL_523691.json">https://www.epicov.org/acknowledgement/36/91/EPI_ISL_523691.json</a> |
| Netherlands/ZH-EMC-355/2020 | EPI_ISL_523695 | Dutch COVID-19 response team | Erasmus Medical Center | Bas Oude Munnink et al | <a href="https://www.epicov.org/acknowledgement/36/95/EPI_ISL_523695.json">https://www.epicov.org/acknowledgement/36/95/EPI_ISL_523695.json</a> |
| Netherlands/ZH-EMC-362/2020 | EPI_ISL_523702 | Dutch COVID-19 response team | Erasmus Medical Center | Bas Oude Munnink et al | <a href="https://www.epicov.org/acknowledgement/37/02/EPI_ISL_523702.json">https://www.epicov.org/acknowledgement/37/02/EPI_ISL_523702.json</a> |
| Netherlands/ZH-EMC-365/2020 | EPI_ISL_523705 | Dutch COVID-19 response team | Erasmus Medical Center | Bas Oude Munnink et al | <a href="https://www.epicov.org/acknowledgement/37/05/EPI_ISL_523705.json">https://www.epicov.org/acknowledgement/37/05/EPI_ISL_523705.json</a> |
| Netherlands/ZH-EMC-367/2020 | EPI_ISL_523707 | Dutch COVID-19 response team | Erasmus Medical Center | Bas Oude Munnink et al | <a href="https://www.epicov.org/acknowledgement/37/07/EPI_ISL_523707.json">https://www.epicov.org/acknowledgement/37/07/EPI_ISL_523707.json</a> |
| Netherlands/ZH-EMC-368/2020 | EPI_ISL_523708 | Dutch COVID-19 response team | Erasmus Medical Center | Bas Oude Munnink et al | <a href="https://www.epicov.org/acknowledgement/37/08/EPI_ISL_523708.json">https://www.epicov.org/acknowledgement/37/08/EPI_ISL_523708.json</a> |
| Netherlands/ZH-EMC-370/2020 | EPI_ISL_523710 | Dutch COVID-19 response team | Erasmus Medical Center | Bas Oude Munnink et al | <a href="https://www.epicov.org/acknowledgement/37/10/EPI_ISL_523710.json">https://www.epicov.org/acknowledgement/37/10/EPI_ISL_523710.json</a> |
| Netherlands/ZH-EMC-371/2020 | EPI_ISL_523711 | Dutch COVID-19 response team | Erasmus Medical Center | Bas Oude Munnink et al | <a href="https://www.epicov.org/acknowledgement/37/11/EPI_ISL_523711.json">https://www.epicov.org/acknowledgement/37/11/EPI_ISL_523711.json</a> |
| Netherlands/ZH-EMC-372/2020 | EPI_ISL_523712 | Dutch COVID-19 response team | Erasmus Medical Center | Bas Oude Munnink et al | <a href="https://www.epicov.org/acknowledgement/37/12/EPI_ISL_523712.json">https://www.epicov.org/acknowledgement/37/12/EPI_ISL_523712.json</a> |
| Netherlands/ZH-EMC-374/2020 | EPI_ISL_523714 | Dutch COVID-19 response team | Erasmus Medical Center | Bas Oude Munnink et al | <a href="https://www.epicov.org/acknowledgement/37/14/EPI_ISL_523714.json">https://www.epicov.org/acknowledgement/37/14/EPI_ISL_523714.json</a> |
| Netherlands/ZH-EMC-375/2020 | EPI_ISL_523715 | Dutch COVID-19 response team | Erasmus Medical Center | Bas Oude Munnink et al | <a href="https://www.epicov.org/acknowledgement/37/15/EPI_ISL_523715.json">https://www.epicov.org/acknowledgement/37/15/EPI_ISL_523715.json</a> |
| Netherlands/ZH-EMC-378/2020 | EPI_ISL_523718 | Dutch COVID-19 response team | Erasmus Medical Center | Bas Oude Munnink et al | <a href="https://www.epicov.org/acknowledgement/37/18/EPI_ISL_523718.json">https://www.epicov.org/acknowledgement/37/18/EPI_ISL_523718.json</a> |
| Netherlands/ZH-EMC-388/2020 | EPI_ISL_523728 | Dutch COVID-19 response team | Erasmus Medical Center | Bas Oude Munnink et al | <a href="https://www.epicov.org/acknowledgement/37/28/EPI_ISL_523728.json">https://www.epicov.org/acknowledgement/37/28/EPI_ISL_523728.json</a> |
| Netherlands/ZH-EMC-389/2020 | EPI_ISL_523729 | Dutch COVID-19 response team | Erasmus Medical Center | Bas Oude Munnink et al | <a href="https://www.epicov.org/acknowledgement/37/29/EPI_ISL_523729.json">https://www.epicov.org/acknowledgement/37/29/EPI_ISL_523729.json</a> |
| Netherlands/ZH-EMC-390/2020 | EPI_ISL_523730 | Dutch COVID-19 response team | Erasmus Medical Center | Bas Oude Munnink et al | <a href="https://www.epicov.org/acknowledgement/37/30/EPI_ISL_523730.json">https://www.epicov.org/acknowledgement/37/30/EPI_ISL_523730.json</a> |
| Netherlands/ZH-EMC-393/2020 | EPI_ISL_523733 | Dutch COVID-19 response team | Erasmus Medical Center | Bas Oude Munnink et al | <a href="https://www.epicov.org/acknowledgement/37/33/EPI_ISL_523733.json">https://www.epicov.org/acknowledgement/37/33/EPI_ISL_523733.json</a> |
| Netherlands/ZH-EMC-394/2020 | EPI_ISL_523734 | Dutch COVID-19 response team | Erasmus Medical Center | Bas Oude Munnink et al | <a href="https://www.epicov.org/acknowledgement/37/34/EPI_ISL_523734.json">https://www.epicov.org/acknowledgement/37/34/EPI_ISL_523734.json</a> |
| Netherlands/ZH-EMC-397/2020 | EPI_ISL_523737 | Dutch COVID-19 response team | Erasmus Medical Center | Bas Oude Munnink et al | <a href="https://www.epicov.org/acknowledgement/37/37/EPI_ISL_523737.json">https://www.epicov.org/acknowledgement/37/37/EPI_ISL_523737.json</a> |
| Netherlands/ZH-EMC-398/2020 | EPI_ISL_523738 | Dutch COVID-19 response team | Erasmus Medical Center | Bas Oude Munnink et al | <a href="https://www.epicov.org/acknowledgement/37/38/EPI_ISL_523738.json">https://www.epicov.org/acknowledgement/37/38/EPI_ISL_523738.json</a> |
| Netherlands/ZH-EMC-408/2020 | EPI_ISL_523748 | Dutch COVID-19 response team | Erasmus Medical Center | Bas Oude Munnink et al | <a href="https://www.epicov.org/acknowledgement/37/48/EPI_ISL_523748.json">https://www.epicov.org/acknowledgement/37/48/EPI_ISL_523748.json</a> |
| Netherlands/ZH-EMC-409/2020 | EPI_ISL_523749 | Dutch COVID-19 response team | Erasmus Medical Center | Bas Oude Munnink et al | <a href="https://www.epicov.org/acknowledgement/37/49/EPI_ISL_523749.json">https://www.epicov.org/acknowledgement/37/49/EPI_ISL_523749.json</a> |
| Netherlands/ZH-EMC-412/2020 | EPI_ISL_523752 | Dutch COVID-19 response team | Erasmus Medical Center | Bas Oude Munnink et al | <a href="https://www.epicov.org/acknowledgement/37/52/EPI_ISL_523752.json">https://www.epicov.org/acknowledgement/37/52/EPI_ISL_523752.json</a> |
| Netherlands/ZH-EMC-413/2020 | EPI_ISL_523753 | Dutch COVID-19 response team | Erasmus Medical Center | Bas Oude Munnink et al | <a href="https://www.epicov.org/acknowledgement/37/53/EPI_ISL_523753.json">https://www.epicov.org/acknowledgement/37/53/EPI_ISL_523753.json</a> |
| Netherlands/ZH-EMC-414/2020 | EPI_ISL_523754 | Dutch COVID-19 response team | Erasmus Medical Center | Bas Oude Munnink et al | <a href="https://www.epicov.org/acknowledgement/37/54/EPI_ISL_523754.json">https://www.epicov.org/acknowledgement/37/54/EPI_ISL_523754.json</a> |

| seq_id                      | gisaid_epi_isl | originating_lab              | submitting_lab         | authors                | url                                                                                                                                             |
|-----------------------------|----------------|------------------------------|------------------------|------------------------|-------------------------------------------------------------------------------------------------------------------------------------------------|
| Netherlands/ZH-EMC-415/2020 | EPI_ISL_523755 | Dutch COVID-19 response team | Erasmus Medical Center | Bas Oude Munnink et al | <a href="https://www.epicov.org/acknowledgement/37/55/EPI_ISL_523755.json">https://www.epicov.org/acknowledgement/37/55/EPI_ISL_523755.json</a> |
| Netherlands/ZH-EMC-417/2020 | EPI_ISL_523757 | Dutch COVID-19 response team | Erasmus Medical Center | Bas Oude Munnink et al | <a href="https://www.epicov.org/acknowledgement/37/57/EPI_ISL_523757.json">https://www.epicov.org/acknowledgement/37/57/EPI_ISL_523757.json</a> |
| Netherlands/ZH-EMC-418/2020 | EPI_ISL_523758 | Dutch COVID-19 response team | Erasmus Medical Center | Bas Oude Munnink et al | <a href="https://www.epicov.org/acknowledgement/37/58/EPI_ISL_523758.json">https://www.epicov.org/acknowledgement/37/58/EPI_ISL_523758.json</a> |
| Netherlands/ZH-EMC-422/2020 | EPI_ISL_523761 | Dutch COVID-19 response team | Erasmus Medical Center | Bas Oude Munnink et al | <a href="https://www.epicov.org/acknowledgement/37/61/EPI_ISL_523761.json">https://www.epicov.org/acknowledgement/37/61/EPI_ISL_523761.json</a> |
| Netherlands/ZH-EMC-427/2020 | EPI_ISL_523766 | Dutch COVID-19 response team | Erasmus Medical Center | Bas Oude Munnink et al | <a href="https://www.epicov.org/acknowledgement/37/66/EPI_ISL_523766.json">https://www.epicov.org/acknowledgement/37/66/EPI_ISL_523766.json</a> |
| Netherlands/ZH-EMC-429/2020 | EPI_ISL_523767 | Dutch COVID-19 response team | Erasmus Medical Center | Bas Oude Munnink et al | <a href="https://www.epicov.org/acknowledgement/37/67/EPI_ISL_523767.json">https://www.epicov.org/acknowledgement/37/67/EPI_ISL_523767.json</a> |
| Netherlands/ZH-EMC-431/2020 | EPI_ISL_523769 | Dutch COVID-19 response team | Erasmus Medical Center | Bas Oude Munnink et al | <a href="https://www.epicov.org/acknowledgement/37/69/EPI_ISL_523769.json">https://www.epicov.org/acknowledgement/37/69/EPI_ISL_523769.json</a> |
| Netherlands/ZH-EMC-434/2020 | EPI_ISL_523772 | Dutch COVID-19 response team | Erasmus Medical Center | Bas Oude Munnink et al | <a href="https://www.epicov.org/acknowledgement/37/72/EPI_ISL_523772.json">https://www.epicov.org/acknowledgement/37/72/EPI_ISL_523772.json</a> |
| Netherlands/ZH-EMC-437/2020 | EPI_ISL_523775 | Dutch COVID-19 response team | Erasmus Medical Center | Bas Oude Munnink et al | <a href="https://www.epicov.org/acknowledgement/37/75/EPI_ISL_523775.json">https://www.epicov.org/acknowledgement/37/75/EPI_ISL_523775.json</a> |
| Netherlands/ZH-EMC-439/2020 | EPI_ISL_523777 | Dutch COVID-19 response team | Erasmus Medical Center | Bas Oude Munnink et al | <a href="https://www.epicov.org/acknowledgement/37/77/EPI_ISL_523777.json">https://www.epicov.org/acknowledgement/37/77/EPI_ISL_523777.json</a> |
| Netherlands/ZH-EMC-441/2020 | EPI_ISL_523779 | Dutch COVID-19 response team | Erasmus Medical Center | Bas Oude Munnink et al | <a href="https://www.epicov.org/acknowledgement/37/79/EPI_ISL_523779.json">https://www.epicov.org/acknowledgement/37/79/EPI_ISL_523779.json</a> |
| Netherlands/ZH-EMC-443/2020 | EPI_ISL_523781 | Dutch COVID-19 response team | Erasmus Medical Center | Bas Oude Munnink et al | <a href="https://www.epicov.org/acknowledgement/37/81/EPI_ISL_523781.json">https://www.epicov.org/acknowledgement/37/81/EPI_ISL_523781.json</a> |
| Netherlands/ZH-EMC-444/2020 | EPI_ISL_523782 | Dutch COVID-19 response team | Erasmus Medical Center | Bas Oude Munnink et al | <a href="https://www.epicov.org/acknowledgement/37/82/EPI_ISL_523782.json">https://www.epicov.org/acknowledgement/37/82/EPI_ISL_523782.json</a> |
| Netherlands/ZH-EMC-445/2020 | EPI_ISL_523783 | Dutch COVID-19 response team | Erasmus Medical Center | Bas Oude Munnink et al | <a href="https://www.epicov.org/acknowledgement/37/83/EPI_ISL_523783.json">https://www.epicov.org/acknowledgement/37/83/EPI_ISL_523783.json</a> |
| Netherlands/ZH-EMC-446/2020 | EPI_ISL_523784 | Dutch COVID-19 response team | Erasmus Medical Center | Bas Oude Munnink et al | <a href="https://www.epicov.org/acknowledgement/37/84/EPI_ISL_523784.json">https://www.epicov.org/acknowledgement/37/84/EPI_ISL_523784.json</a> |
| Netherlands/ZH-EMC-448/2020 | EPI_ISL_523786 | Dutch COVID-19 response team | Erasmus Medical Center | Bas Oude Munnink et al | <a href="https://www.epicov.org/acknowledgement/37/86/EPI_ISL_523786.json">https://www.epicov.org/acknowledgement/37/86/EPI_ISL_523786.json</a> |
| Netherlands/ZH-EMC-450/2020 | EPI_ISL_523788 | Dutch COVID-19 response team | Erasmus Medical Center | Bas Oude Munnink et al | <a href="https://www.epicov.org/acknowledgement/37/88/EPI_ISL_523788.json">https://www.epicov.org/acknowledgement/37/88/EPI_ISL_523788.json</a> |
| Netherlands/ZH-EMC-452/2020 | EPI_ISL_523790 | Dutch COVID-19 response team | Erasmus Medical Center | Bas Oude Munnink et al | <a href="https://www.epicov.org/acknowledgement/37/90/EPI_ISL_523790.json">https://www.epicov.org/acknowledgement/37/90/EPI_ISL_523790.json</a> |
| Netherlands/ZH-EMC-459/2020 | EPI_ISL_523796 | Dutch COVID-19 response team | Erasmus Medical Center | Bas Oude Munnink et al | <a href="https://www.epicov.org/acknowledgement/37/96/EPI_ISL_523796.json">https://www.epicov.org/acknowledgement/37/96/EPI_ISL_523796.json</a> |
| Netherlands/ZH-EMC-462/2020 | EPI_ISL_523799 | Dutch COVID-19 response team | Erasmus Medical Center | Bas Oude Munnink et al | <a href="https://www.epicov.org/acknowledgement/37/99/EPI_ISL_523799.json">https://www.epicov.org/acknowledgement/37/99/EPI_ISL_523799.json</a> |
| Netherlands/ZH-EMC-464/2020 | EPI_ISL_523800 | Dutch COVID-19 response team | Erasmus Medical Center | Bas Oude Munnink et al | <a href="https://www.epicov.org/acknowledgement/38/00/EPI_ISL_523800.json">https://www.epicov.org/acknowledgement/38/00/EPI_ISL_523800.json</a> |
| Netherlands/ZH-EMC-465/2020 | EPI_ISL_523801 | Dutch COVID-19 response team | Erasmus Medical Center | Bas Oude Munnink et al | <a href="https://www.epicov.org/acknowledgement/38/01/EPI_ISL_523801.json">https://www.epicov.org/acknowledgement/38/01/EPI_ISL_523801.json</a> |
| Netherlands/ZH-EMC-469/2020 | EPI_ISL_523805 | Dutch COVID-19 response team | Erasmus Medical Center | Bas Oude Munnink et al | <a href="https://www.epicov.org/acknowledgement/38/05/EPI_ISL_523805.json">https://www.epicov.org/acknowledgement/38/05/EPI_ISL_523805.json</a> |
| Netherlands/ZH-EMC-473/2020 | EPI_ISL_523809 | Dutch COVID-19 response team | Erasmus Medical Center | Bas Oude Munnink et al | <a href="https://www.epicov.org/acknowledgement/38/09/EPI_ISL_523809.json">https://www.epicov.org/acknowledgement/38/09/EPI_ISL_523809.json</a> |
| Netherlands/ZH-EMC-475/2020 | EPI_ISL_574787 | Dutch COVID-19 response team | Erasmus Medical Center | Bas Oude Munnink et al | <a href="https://www.epicov.org/acknowledgement/47/87/EPI_ISL_574787.json">https://www.epicov.org/acknowledgement/47/87/EPI_ISL_574787.json</a> |

| seq_id                      | gisaid_epi_isl | originating_lab              | submitting_lab         | authors                | url                                                                                                                                             |
|-----------------------------|----------------|------------------------------|------------------------|------------------------|-------------------------------------------------------------------------------------------------------------------------------------------------|
| Netherlands/ZH-EMC-479/2020 | EPI_ISL_577909 | Dutch COVID-19 response team | Erasmus Medical Center | Bas Oude Munnink et al | <a href="https://www.epicov.org/acknowledgement/79/09/EPI_ISL_577909.json">https://www.epicov.org/acknowledgement/79/09/EPI_ISL_577909.json</a> |
| Netherlands/ZH-EMC-481/2020 | EPI_ISL_577911 | Dutch COVID-19 response team | Erasmus Medical Center | Bas Oude Munnink et al | <a href="https://www.epicov.org/acknowledgement/79/11/EPI_ISL_577911.json">https://www.epicov.org/acknowledgement/79/11/EPI_ISL_577911.json</a> |
| Netherlands/ZH-EMC-485/2020 | EPI_ISL_577915 | Dutch COVID-19 response team | Erasmus Medical Center | Bas Oude Munnink et al | <a href="https://www.epicov.org/acknowledgement/79/15/EPI_ISL_577915.json">https://www.epicov.org/acknowledgement/79/15/EPI_ISL_577915.json</a> |
| Netherlands/ZH-EMC-497/2020 | EPI_ISL_577926 | Dutch COVID-19 response team | Erasmus Medical Center | Bas Oude Munnink et al | <a href="https://www.epicov.org/acknowledgement/79/26/EPI_ISL_577926.json">https://www.epicov.org/acknowledgement/79/26/EPI_ISL_577926.json</a> |
| Netherlands/ZH-EMC-501/2020 | EPI_ISL_577930 | Dutch COVID-19 response team | Erasmus Medical Center | Bas Oude Munnink et al | <a href="https://www.epicov.org/acknowledgement/79/30/EPI_ISL_577930.json">https://www.epicov.org/acknowledgement/79/30/EPI_ISL_577930.json</a> |
| Netherlands/ZH-EMC-502/2020 | EPI_ISL_577931 | Dutch COVID-19 response team | Erasmus Medical Center | Bas Oude Munnink et al | <a href="https://www.epicov.org/acknowledgement/79/31/EPI_ISL_577931.json">https://www.epicov.org/acknowledgement/79/31/EPI_ISL_577931.json</a> |
| Netherlands/ZH-EMC-506/2020 | EPI_ISL_577935 | Dutch COVID-19 response team | Erasmus Medical Center | Bas Oude Munnink et al | <a href="https://www.epicov.org/acknowledgement/79/35/EPI_ISL_577935.json">https://www.epicov.org/acknowledgement/79/35/EPI_ISL_577935.json</a> |
| Netherlands/ZH-EMC-509/2020 | EPI_ISL_577938 | Dutch COVID-19 response team | Erasmus Medical Center | Bas Oude Munnink et al | <a href="https://www.epicov.org/acknowledgement/79/38/EPI_ISL_577938.json">https://www.epicov.org/acknowledgement/79/38/EPI_ISL_577938.json</a> |
| Netherlands/ZH-EMC-512/2020 | EPI_ISL_577941 | Dutch COVID-19 response team | Erasmus Medical Center | Bas Oude Munnink et al | <a href="https://www.epicov.org/acknowledgement/79/41/EPI_ISL_577941.json">https://www.epicov.org/acknowledgement/79/41/EPI_ISL_577941.json</a> |
| Netherlands/ZH-EMC-513/2020 | EPI_ISL_577942 | Dutch COVID-19 response team | Erasmus Medical Center | Bas Oude Munnink et al | <a href="https://www.epicov.org/acknowledgement/79/42/EPI_ISL_577942.json">https://www.epicov.org/acknowledgement/79/42/EPI_ISL_577942.json</a> |
| Netherlands/ZH-EMC-516/2020 | EPI_ISL_577944 | Dutch COVID-19 response team | Erasmus Medical Center | Bas Oude Munnink et al | <a href="https://www.epicov.org/acknowledgement/79/44/EPI_ISL_577944.json">https://www.epicov.org/acknowledgement/79/44/EPI_ISL_577944.json</a> |
| Netherlands/ZH-EMC-521/2020 | EPI_ISL_577949 | Dutch COVID-19 response team | Erasmus Medical Center | Bas Oude Munnink et al | <a href="https://www.epicov.org/acknowledgement/79/49/EPI_ISL_577949.json">https://www.epicov.org/acknowledgement/79/49/EPI_ISL_577949.json</a> |
| Netherlands/ZH-EMC-522/2020 | EPI_ISL_577950 | Dutch COVID-19 response team | Erasmus Medical Center | Bas Oude Munnink et al | <a href="https://www.epicov.org/acknowledgement/79/50/EPI_ISL_577950.json">https://www.epicov.org/acknowledgement/79/50/EPI_ISL_577950.json</a> |
| Netherlands/ZH-EMC-526/2020 | EPI_ISL_577954 | Dutch COVID-19 response team | Erasmus Medical Center | Bas Oude Munnink et al | <a href="https://www.epicov.org/acknowledgement/79/54/EPI_ISL_577954.json">https://www.epicov.org/acknowledgement/79/54/EPI_ISL_577954.json</a> |
| Netherlands/ZH-EMC-536/2020 | EPI_ISL_577964 | Dutch COVID-19 response team | Erasmus Medical Center | Bas Oude Munnink et al | <a href="https://www.epicov.org/acknowledgement/79/64/EPI_ISL_577964.json">https://www.epicov.org/acknowledgement/79/64/EPI_ISL_577964.json</a> |
| Netherlands/ZH-EMC-543/2020 | EPI_ISL_577971 | Dutch COVID-19 response team | Erasmus Medical Center | Bas Oude Munnink et al | <a href="https://www.epicov.org/acknowledgement/79/71/EPI_ISL_577971.json">https://www.epicov.org/acknowledgement/79/71/EPI_ISL_577971.json</a> |
| Netherlands/ZH-EMC-544/2020 | EPI_ISL_577972 | Dutch COVID-19 response team | Erasmus Medical Center | Bas Oude Munnink et al | <a href="https://www.epicov.org/acknowledgement/79/72/EPI_ISL_577972.json">https://www.epicov.org/acknowledgement/79/72/EPI_ISL_577972.json</a> |
| Netherlands/ZH-EMC-550/2020 | EPI_ISL_577978 | Dutch COVID-19 response team | Erasmus Medical Center | Bas Oude Munnink et al | <a href="https://www.epicov.org/acknowledgement/79/78/EPI_ISL_577978.json">https://www.epicov.org/acknowledgement/79/78/EPI_ISL_577978.json</a> |
| Netherlands/ZH-EMC-553/2020 | EPI_ISL_577981 | Dutch COVID-19 response team | Erasmus Medical Center | Bas Oude Munnink et al | <a href="https://www.epicov.org/acknowledgement/79/81/EPI_ISL_577981.json">https://www.epicov.org/acknowledgement/79/81/EPI_ISL_577981.json</a> |
| Netherlands/ZH-EMC-554/2020 | EPI_ISL_577982 | Dutch COVID-19 response team | Erasmus Medical Center | Bas Oude Munnink et al | <a href="https://www.epicov.org/acknowledgement/79/82/EPI_ISL_577982.json">https://www.epicov.org/acknowledgement/79/82/EPI_ISL_577982.json</a> |
| Netherlands/ZH-EMC-555/2020 | EPI_ISL_577983 | Dutch COVID-19 response team | Erasmus Medical Center | Bas Oude Munnink et al | <a href="https://www.epicov.org/acknowledgement/79/83/EPI_ISL_577983.json">https://www.epicov.org/acknowledgement/79/83/EPI_ISL_577983.json</a> |
| Netherlands/ZH-EMC-562/2020 | EPI_ISL_577990 | Dutch COVID-19 response team | Erasmus Medical Center | Bas Oude Munnink et al | <a href="https://www.epicov.org/acknowledgement/79/90/EPI_ISL_577990.json">https://www.epicov.org/acknowledgement/79/90/EPI_ISL_577990.json</a> |
| Netherlands/ZH-EMC-563/2020 | EPI_ISL_577991 | Dutch COVID-19 response team | Erasmus Medical Center | Bas Oude Munnink et al | <a href="https://www.epicov.org/acknowledgement/79/91/EPI_ISL_577991.json">https://www.epicov.org/acknowledgement/79/91/EPI_ISL_577991.json</a> |
| Netherlands/ZH-EMC-566/2020 | EPI_ISL_577994 | Dutch COVID-19 response team | Erasmus Medical Center | Bas Oude Munnink et al | <a href="https://www.epicov.org/acknowledgement/79/94/EPI_ISL_577994.json">https://www.epicov.org/acknowledgement/79/94/EPI_ISL_577994.json</a> |
| Netherlands/ZH-EMC-569/2020 | EPI_ISL_577997 | Dutch COVID-19 response team | Erasmus Medical Center | Bas Oude Munnink et al | <a href="https://www.epicov.org/acknowledgement/79/97/EPI_ISL_577997.json">https://www.epicov.org/acknowledgement/79/97/EPI_ISL_577997.json</a> |

| seq_id                      | gisaid_epi_isl | originating_lab              | submitting_lab         | authors                | url                                                                                                                                             |
|-----------------------------|----------------|------------------------------|------------------------|------------------------|-------------------------------------------------------------------------------------------------------------------------------------------------|
| Netherlands/ZH-EMC-576/2020 | EPI_ISL_578004 | Dutch COVID-19 response team | Erasmus Medical Center | Bas Oude Munnink et al | <a href="https://www.epicov.org/acknowledgement/80/04/EPI_ISL_578004.json">https://www.epicov.org/acknowledgement/80/04/EPI_ISL_578004.json</a> |
| Netherlands/ZH-EMC-579/2020 | EPI_ISL_578007 | Dutch COVID-19 response team | Erasmus Medical Center | Bas Oude Munnink et al | <a href="https://www.epicov.org/acknowledgement/80/07/EPI_ISL_578007.json">https://www.epicov.org/acknowledgement/80/07/EPI_ISL_578007.json</a> |
| Netherlands/ZH-EMC-581/2020 | EPI_ISL_578009 | Dutch COVID-19 response team | Erasmus Medical Center | Bas Oude Munnink et al | <a href="https://www.epicov.org/acknowledgement/80/09/EPI_ISL_578009.json">https://www.epicov.org/acknowledgement/80/09/EPI_ISL_578009.json</a> |
| Netherlands/ZH-EMC-582/2020 | EPI_ISL_578010 | Dutch COVID-19 response team | Erasmus Medical Center | Bas Oude Munnink et al | <a href="https://www.epicov.org/acknowledgement/80/10/EPI_ISL_578010.json">https://www.epicov.org/acknowledgement/80/10/EPI_ISL_578010.json</a> |
| Netherlands/ZH-EMC-583/2020 | EPI_ISL_578011 | Dutch COVID-19 response team | Erasmus Medical Center | Bas Oude Munnink et al | <a href="https://www.epicov.org/acknowledgement/80/11/EPI_ISL_578011.json">https://www.epicov.org/acknowledgement/80/11/EPI_ISL_578011.json</a> |
| Netherlands/ZH-EMC-585/2020 | EPI_ISL_578013 | Dutch COVID-19 response team | Erasmus Medical Center | Bas Oude Munnink et al | <a href="https://www.epicov.org/acknowledgement/80/13/EPI_ISL_578013.json">https://www.epicov.org/acknowledgement/80/13/EPI_ISL_578013.json</a> |
| Netherlands/ZH-EMC-586/2020 | EPI_ISL_578014 | Dutch COVID-19 response team | Erasmus Medical Center | Bas Oude Munnink et al | <a href="https://www.epicov.org/acknowledgement/80/14/EPI_ISL_578014.json">https://www.epicov.org/acknowledgement/80/14/EPI_ISL_578014.json</a> |
| Netherlands/ZH-EMC-590/2020 | EPI_ISL_578018 | Dutch COVID-19 response team | Erasmus Medical Center | Bas Oude Munnink et al | <a href="https://www.epicov.org/acknowledgement/80/18/EPI_ISL_578018.json">https://www.epicov.org/acknowledgement/80/18/EPI_ISL_578018.json</a> |
| Netherlands/ZH-EMC-591/2020 | EPI_ISL_578019 | Dutch COVID-19 response team | Erasmus Medical Center | Bas Oude Munnink et al | <a href="https://www.epicov.org/acknowledgement/80/19/EPI_ISL_578019.json">https://www.epicov.org/acknowledgement/80/19/EPI_ISL_578019.json</a> |
| Netherlands/ZH-EMC-593/2020 | EPI_ISL_578021 | Dutch COVID-19 response team | Erasmus Medical Center | Bas Oude Munnink et al | <a href="https://www.epicov.org/acknowledgement/80/21/EPI_ISL_578021.json">https://www.epicov.org/acknowledgement/80/21/EPI_ISL_578021.json</a> |
| Netherlands/ZH-EMC-596/2020 | EPI_ISL_578024 | Dutch COVID-19 response team | Erasmus Medical Center | Bas Oude Munnink et al | <a href="https://www.epicov.org/acknowledgement/80/24/EPI_ISL_578024.json">https://www.epicov.org/acknowledgement/80/24/EPI_ISL_578024.json</a> |
| Netherlands/ZH-EMC-601/2020 | EPI_ISL_578029 | Dutch COVID-19 response team | Erasmus Medical Center | Bas Oude Munnink et al | <a href="https://www.epicov.org/acknowledgement/80/29/EPI_ISL_578029.json">https://www.epicov.org/acknowledgement/80/29/EPI_ISL_578029.json</a> |
| Netherlands/ZH-EMC-605/2020 | EPI_ISL_578033 | Dutch COVID-19 response team | Erasmus Medical Center | Bas Oude Munnink et al | <a href="https://www.epicov.org/acknowledgement/80/33/EPI_ISL_578033.json">https://www.epicov.org/acknowledgement/80/33/EPI_ISL_578033.json</a> |
| Netherlands/ZH-EMC-607/2020 | EPI_ISL_578035 | Dutch COVID-19 response team | Erasmus Medical Center | Bas Oude Munnink et al | <a href="https://www.epicov.org/acknowledgement/80/35/EPI_ISL_578035.json">https://www.epicov.org/acknowledgement/80/35/EPI_ISL_578035.json</a> |
| Netherlands/ZH-EMC-610/2020 | EPI_ISL_578038 | Dutch COVID-19 response team | Erasmus Medical Center | Bas Oude Munnink et al | <a href="https://www.epicov.org/acknowledgement/80/38/EPI_ISL_578038.json">https://www.epicov.org/acknowledgement/80/38/EPI_ISL_578038.json</a> |
| Netherlands/ZH-EMC-617/2020 | EPI_ISL_578045 | Dutch COVID-19 response team | Erasmus Medical Center | Bas Oude Munnink et al | <a href="https://www.epicov.org/acknowledgement/80/45/EPI_ISL_578045.json">https://www.epicov.org/acknowledgement/80/45/EPI_ISL_578045.json</a> |
| Netherlands/ZH-EMC-619/2020 | EPI_ISL_578047 | Dutch COVID-19 response team | Erasmus Medical Center | Bas Oude Munnink et al | <a href="https://www.epicov.org/acknowledgement/80/47/EPI_ISL_578047.json">https://www.epicov.org/acknowledgement/80/47/EPI_ISL_578047.json</a> |
| Netherlands/ZH-EMC-621/2020 | EPI_ISL_578049 | Dutch COVID-19 response team | Erasmus Medical Center | Bas Oude Munnink et al | <a href="https://www.epicov.org/acknowledgement/80/49/EPI_ISL_578049.json">https://www.epicov.org/acknowledgement/80/49/EPI_ISL_578049.json</a> |
| Netherlands/ZH-EMC-625/2020 | EPI_ISL_578053 | Dutch COVID-19 response team | Erasmus Medical Center | Bas Oude Munnink et al | <a href="https://www.epicov.org/acknowledgement/80/53/EPI_ISL_578053.json">https://www.epicov.org/acknowledgement/80/53/EPI_ISL_578053.json</a> |
| Netherlands/ZH-EMC-627/2020 | EPI_ISL_578055 | Dutch COVID-19 response team | Erasmus Medical Center | Bas Oude Munnink et al | <a href="https://www.epicov.org/acknowledgement/80/55/EPI_ISL_578055.json">https://www.epicov.org/acknowledgement/80/55/EPI_ISL_578055.json</a> |
| Netherlands/ZH-EMC-629/2020 | EPI_ISL_578057 | Dutch COVID-19 response team | Erasmus Medical Center | Bas Oude Munnink et al | <a href="https://www.epicov.org/acknowledgement/80/57/EPI_ISL_578057.json">https://www.epicov.org/acknowledgement/80/57/EPI_ISL_578057.json</a> |
| Netherlands/ZH-EMC-630/2020 | EPI_ISL_578058 | Dutch COVID-19 response team | Erasmus Medical Center | Bas Oude Munnink et al | <a href="https://www.epicov.org/acknowledgement/80/58/EPI_ISL_578058.json">https://www.epicov.org/acknowledgement/80/58/EPI_ISL_578058.json</a> |
| Netherlands/ZH-EMC-632/2020 | EPI_ISL_578060 | Dutch COVID-19 response team | Erasmus Medical Center | Bas Oude Munnink et al | <a href="https://www.epicov.org/acknowledgement/80/60/EPI_ISL_578060.json">https://www.epicov.org/acknowledgement/80/60/EPI_ISL_578060.json</a> |
| Netherlands/ZH-EMC-636/2020 | EPI_ISL_578064 | Dutch COVID-19 response team | Erasmus Medical Center | Bas Oude Munnink et al | <a href="https://www.epicov.org/acknowledgement/80/64/EPI_ISL_578064.json">https://www.epicov.org/acknowledgement/80/64/EPI_ISL_578064.json</a> |
| Netherlands/ZH-EMC-639/2020 | EPI_ISL_578067 | Dutch COVID-19 response team | Erasmus Medical Center | Bas Oude Munnink et al | <a href="https://www.epicov.org/acknowledgement/80/67/EPI_ISL_578067.json">https://www.epicov.org/acknowledgement/80/67/EPI_ISL_578067.json</a> |

| seq_id                      | gisaid_epi_isl | originating_lab              | submitting_lab         | authors                | url                                                                                                                                             |
|-----------------------------|----------------|------------------------------|------------------------|------------------------|-------------------------------------------------------------------------------------------------------------------------------------------------|
| Netherlands/ZH-EMC-641/2020 | EPI_ISL_578069 | Dutch COVID-19 response team | Erasmus Medical Center | Bas Oude Munnink et al | <a href="https://www.epicov.org/acknowledgement/80/69/EPI_ISL_578069.json">https://www.epicov.org/acknowledgement/80/69/EPI_ISL_578069.json</a> |
| Netherlands/ZH-EMC-646/2020 | EPI_ISL_578074 | Dutch COVID-19 response team | Erasmus Medical Center | Bas Oude Munnink et al | <a href="https://www.epicov.org/acknowledgement/80/74/EPI_ISL_578074.json">https://www.epicov.org/acknowledgement/80/74/EPI_ISL_578074.json</a> |
| Netherlands/ZH-EMC-648/2020 | EPI_ISL_578076 | Dutch COVID-19 response team | Erasmus Medical Center | Bas Oude Munnink et al | <a href="https://www.epicov.org/acknowledgement/80/76/EPI_ISL_578076.json">https://www.epicov.org/acknowledgement/80/76/EPI_ISL_578076.json</a> |
| Netherlands/ZH-EMC-653/2020 | EPI_ISL_632363 | Dutch COVID-19 response team | Erasmus Medical Center | Bas Oude Munnink et al | <a href="https://www.epicov.org/acknowledgement/23/63/EPI_ISL_632363.json">https://www.epicov.org/acknowledgement/23/63/EPI_ISL_632363.json</a> |
| Netherlands/ZH-EMC-664/2020 | EPI_ISL_632505 | Dutch COVID-19 response team | Erasmus Medical Center | Bas Oude Munnink et al | <a href="https://www.epicov.org/acknowledgement/25/05/EPI_ISL_632505.json">https://www.epicov.org/acknowledgement/25/05/EPI_ISL_632505.json</a> |
| Netherlands/ZH-EMC-665/2020 | EPI_ISL_632506 | Dutch COVID-19 response team | Erasmus Medical Center | Bas Oude Munnink et al | <a href="https://www.epicov.org/acknowledgement/25/06/EPI_ISL_632506.json">https://www.epicov.org/acknowledgement/25/06/EPI_ISL_632506.json</a> |
| Netherlands/ZH-EMC-668/2020 | EPI_ISL_632508 | Dutch COVID-19 response team | Erasmus Medical Center | Bas Oude Munnink et al | <a href="https://www.epicov.org/acknowledgement/25/08/EPI_ISL_632508.json">https://www.epicov.org/acknowledgement/25/08/EPI_ISL_632508.json</a> |
| Netherlands/ZH-EMC-670/2020 | EPI_ISL_632512 | Dutch COVID-19 response team | Erasmus Medical Center | Bas Oude Munnink et al | <a href="https://www.epicov.org/acknowledgement/25/12/EPI_ISL_632512.json">https://www.epicov.org/acknowledgement/25/12/EPI_ISL_632512.json</a> |
| Netherlands/ZH-EMC-671/2020 | EPI_ISL_632513 | Dutch COVID-19 response team | Erasmus Medical Center | Bas Oude Munnink et al | <a href="https://www.epicov.org/acknowledgement/25/13/EPI_ISL_632513.json">https://www.epicov.org/acknowledgement/25/13/EPI_ISL_632513.json</a> |
| Netherlands/ZH-EMC-676/2020 | EPI_ISL_632516 | Dutch COVID-19 response team | Erasmus Medical Center | Bas Oude Munnink et al | <a href="https://www.epicov.org/acknowledgement/25/16/EPI_ISL_632516.json">https://www.epicov.org/acknowledgement/25/16/EPI_ISL_632516.json</a> |
| Netherlands/ZH-EMC-677/2020 | EPI_ISL_632517 | Dutch COVID-19 response team | Erasmus Medical Center | Bas Oude Munnink et al | <a href="https://www.epicov.org/acknowledgement/25/17/EPI_ISL_632517.json">https://www.epicov.org/acknowledgement/25/17/EPI_ISL_632517.json</a> |
| Netherlands/ZH-EMC-678/2020 | EPI_ISL_632518 | Dutch COVID-19 response team | Erasmus Medical Center | Bas Oude Munnink et al | <a href="https://www.epicov.org/acknowledgement/25/18/EPI_ISL_632518.json">https://www.epicov.org/acknowledgement/25/18/EPI_ISL_632518.json</a> |
| Netherlands/ZH-EMC-679/2020 | EPI_ISL_632519 | Dutch COVID-19 response team | Erasmus Medical Center | Bas Oude Munnink et al | <a href="https://www.epicov.org/acknowledgement/25/19/EPI_ISL_632519.json">https://www.epicov.org/acknowledgement/25/19/EPI_ISL_632519.json</a> |
| Netherlands/ZH-EMC-682/2020 | EPI_ISL_632345 | Dutch COVID-19 response team | Erasmus Medical Center | Bas Oude Munnink et al | <a href="https://www.epicov.org/acknowledgement/23/45/EPI_ISL_632345.json">https://www.epicov.org/acknowledgement/23/45/EPI_ISL_632345.json</a> |
| Netherlands/ZH-EMC-686/2020 | EPI_ISL_632541 | Dutch COVID-19 response team | Erasmus Medical Center | Bas Oude Munnink et al | <a href="https://www.epicov.org/acknowledgement/25/41/EPI_ISL_632541.json">https://www.epicov.org/acknowledgement/25/41/EPI_ISL_632541.json</a> |
| Netherlands/ZH-EMC-692/2020 | EPI_ISL_632546 | Dutch COVID-19 response team | Erasmus Medical Center | Bas Oude Munnink et al | <a href="https://www.epicov.org/acknowledgement/25/46/EPI_ISL_632546.json">https://www.epicov.org/acknowledgement/25/46/EPI_ISL_632546.json</a> |
| Netherlands/ZH-EMC-698/2020 | EPI_ISL_632347 | Dutch COVID-19 response team | Erasmus Medical Center | Bas Oude Munnink et al | <a href="https://www.epicov.org/acknowledgement/23/47/EPI_ISL_632347.json">https://www.epicov.org/acknowledgement/23/47/EPI_ISL_632347.json</a> |
| Netherlands/ZH-EMC-700/2020 | EPI_ISL_632400 | Dutch COVID-19 response team | Erasmus Medical Center | Bas Oude Munnink et al | <a href="https://www.epicov.org/acknowledgement/24/00/EPI_ISL_632400.json">https://www.epicov.org/acknowledgement/24/00/EPI_ISL_632400.json</a> |
| Netherlands/ZH-EMC-701/2020 | EPI_ISL_632426 | Dutch COVID-19 response team | Erasmus Medical Center | Bas Oude Munnink et al | <a href="https://www.epicov.org/acknowledgement/24/26/EPI_ISL_632426.json">https://www.epicov.org/acknowledgement/24/26/EPI_ISL_632426.json</a> |
| Netherlands/ZH-EMC-703/2020 | EPI_ISL_632551 | Dutch COVID-19 response team | Erasmus Medical Center | Bas Oude Munnink et al | <a href="https://www.epicov.org/acknowledgement/25/51/EPI_ISL_632551.json">https://www.epicov.org/acknowledgement/25/51/EPI_ISL_632551.json</a> |
| Netherlands/ZH-EMC-704/2020 | EPI_ISL_632552 | Dutch COVID-19 response team | Erasmus Medical Center | Bas Oude Munnink et al | <a href="https://www.epicov.org/acknowledgement/25/52/EPI_ISL_632552.json">https://www.epicov.org/acknowledgement/25/52/EPI_ISL_632552.json</a> |
| Netherlands/ZH-EMC-709/2020 | EPI_ISL_632389 | Dutch COVID-19 response team | Erasmus Medical Center | Bas Oude Munnink et al | <a href="https://www.epicov.org/acknowledgement/23/89/EPI_ISL_632389.json">https://www.epicov.org/acknowledgement/23/89/EPI_ISL_632389.json</a> |
| Netherlands/ZH-EMC-710/2020 | EPI_ISL_632557 | Dutch COVID-19 response team | Erasmus Medical Center | Bas Oude Munnink et al | <a href="https://www.epicov.org/acknowledgement/25/57/EPI_ISL_632557.json">https://www.epicov.org/acknowledgement/25/57/EPI_ISL_632557.json</a> |
| Netherlands/ZH-EMC-711/2020 | EPI_ISL_632558 | Dutch COVID-19 response team | Erasmus Medical Center | Bas Oude Munnink et al | <a href="https://www.epicov.org/acknowledgement/25/58/EPI_ISL_632558.json">https://www.epicov.org/acknowledgement/25/58/EPI_ISL_632558.json</a> |
| Netherlands/ZH-EMC-714/2020 | EPI_ISL_632561 | Dutch COVID-19 response team | Erasmus Medical Center | Bas Oude Munnink et al | <a href="https://www.epicov.org/acknowledgement/25/61/EPI_ISL_632561.json">https://www.epicov.org/acknowledgement/25/61/EPI_ISL_632561.json</a> |

| seq_id                      | gisaid_epi_isl | originating_lab              | submitting_lab         | authors                | url                                                                                                                                             |
|-----------------------------|----------------|------------------------------|------------------------|------------------------|-------------------------------------------------------------------------------------------------------------------------------------------------|
| Netherlands/ZH-EMC-721/2020 | EPI_ISL_632568 | Dutch COVID-19 response team | Erasmus Medical Center | Bas Oude Munnink et al | <a href="https://www.epicov.org/acknowledgement/25/68/EPI_ISL_632568.json">https://www.epicov.org/acknowledgement/25/68/EPI_ISL_632568.json</a> |
| Netherlands/ZH-EMC-722/2020 | EPI_ISL_632569 | Dutch COVID-19 response team | Erasmus Medical Center | Bas Oude Munnink et al | <a href="https://www.epicov.org/acknowledgement/25/69/EPI_ISL_632569.json">https://www.epicov.org/acknowledgement/25/69/EPI_ISL_632569.json</a> |
| Netherlands/ZH-EMC-723/2020 | EPI_ISL_632570 | Dutch COVID-19 response team | Erasmus Medical Center | Bas Oude Munnink et al | <a href="https://www.epicov.org/acknowledgement/25/70/EPI_ISL_632570.json">https://www.epicov.org/acknowledgement/25/70/EPI_ISL_632570.json</a> |
| Netherlands/ZH-EMC-724/2020 | EPI_ISL_632571 | Dutch COVID-19 response team | Erasmus Medical Center | Bas Oude Munnink et al | <a href="https://www.epicov.org/acknowledgement/25/71/EPI_ISL_632571.json">https://www.epicov.org/acknowledgement/25/71/EPI_ISL_632571.json</a> |
| Netherlands/ZH-EMC-726/2020 | EPI_ISL_632572 | Dutch COVID-19 response team | Erasmus Medical Center | Bas Oude Munnink et al | <a href="https://www.epicov.org/acknowledgement/25/72/EPI_ISL_632572.json">https://www.epicov.org/acknowledgement/25/72/EPI_ISL_632572.json</a> |
| Netherlands/ZH-EMC-736/2020 | EPI_ISL_632578 | Dutch COVID-19 response team | Erasmus Medical Center | Bas Oude Munnink et al | <a href="https://www.epicov.org/acknowledgement/25/78/EPI_ISL_632578.json">https://www.epicov.org/acknowledgement/25/78/EPI_ISL_632578.json</a> |
| Netherlands/ZH-EMC-738/2020 | EPI_ISL_632580 | Dutch COVID-19 response team | Erasmus Medical Center | Bas Oude Munnink et al | <a href="https://www.epicov.org/acknowledgement/25/80/EPI_ISL_632580.json">https://www.epicov.org/acknowledgement/25/80/EPI_ISL_632580.json</a> |
| Netherlands/ZH-EMC-740/2020 | EPI_ISL_632582 | Dutch COVID-19 response team | Erasmus Medical Center | Bas Oude Munnink et al | <a href="https://www.epicov.org/acknowledgement/25/82/EPI_ISL_632582.json">https://www.epicov.org/acknowledgement/25/82/EPI_ISL_632582.json</a> |
| Netherlands/ZH-EMC-742/2020 | EPI_ISL_632583 | Dutch COVID-19 response team | Erasmus Medical Center | Bas Oude Munnink et al | <a href="https://www.epicov.org/acknowledgement/25/83/EPI_ISL_632583.json">https://www.epicov.org/acknowledgement/25/83/EPI_ISL_632583.json</a> |
| Netherlands/ZH-EMC-745/2020 | EPI_ISL_632586 | Dutch COVID-19 response team | Erasmus Medical Center | Bas Oude Munnink et al | <a href="https://www.epicov.org/acknowledgement/25/86/EPI_ISL_632586.json">https://www.epicov.org/acknowledgement/25/86/EPI_ISL_632586.json</a> |
| Netherlands/ZH-EMC-746/2020 | EPI_ISL_632587 | Dutch COVID-19 response team | Erasmus Medical Center | Bas Oude Munnink et al | <a href="https://www.epicov.org/acknowledgement/25/87/EPI_ISL_632587.json">https://www.epicov.org/acknowledgement/25/87/EPI_ISL_632587.json</a> |
| Netherlands/ZH-EMC-747/2020 | EPI_ISL_632588 | Dutch COVID-19 response team | Erasmus Medical Center | Bas Oude Munnink et al | <a href="https://www.epicov.org/acknowledgement/25/88/EPI_ISL_632588.json">https://www.epicov.org/acknowledgement/25/88/EPI_ISL_632588.json</a> |
| Netherlands/ZH-EMC-749/2020 | EPI_ISL_632590 | Dutch COVID-19 response team | Erasmus Medical Center | Bas Oude Munnink et al | <a href="https://www.epicov.org/acknowledgement/25/90/EPI_ISL_632590.json">https://www.epicov.org/acknowledgement/25/90/EPI_ISL_632590.json</a> |
| Netherlands/ZH-EMC-753/2020 | EPI_ISL_632594 | Dutch COVID-19 response team | Erasmus Medical Center | Bas Oude Munnink et al | <a href="https://www.epicov.org/acknowledgement/25/94/EPI_ISL_632594.json">https://www.epicov.org/acknowledgement/25/94/EPI_ISL_632594.json</a> |
| Netherlands/ZH-EMC-754/2020 | EPI_ISL_632595 | Dutch COVID-19 response team | Erasmus Medical Center | Bas Oude Munnink et al | <a href="https://www.epicov.org/acknowledgement/25/95/EPI_ISL_632595.json">https://www.epicov.org/acknowledgement/25/95/EPI_ISL_632595.json</a> |
| Netherlands/ZH-EMC-756/2020 | EPI_ISL_632381 | Dutch COVID-19 response team | Erasmus Medical Center | Bas Oude Munnink et al | <a href="https://www.epicov.org/acknowledgement/23/81/EPI_ISL_632381.json">https://www.epicov.org/acknowledgement/23/81/EPI_ISL_632381.json</a> |
| Netherlands/ZH-EMC-758/2020 | EPI_ISL_632355 | Dutch COVID-19 response team | Erasmus Medical Center | Bas Oude Munnink et al | <a href="https://www.epicov.org/acknowledgement/23/55/EPI_ISL_632355.json">https://www.epicov.org/acknowledgement/23/55/EPI_ISL_632355.json</a> |
| Netherlands/ZH-EMC-764/2020 | EPI_ISL_632601 | Dutch COVID-19 response team | Erasmus Medical Center | Bas Oude Munnink et al | <a href="https://www.epicov.org/acknowledgement/26/01/EPI_ISL_632601.json">https://www.epicov.org/acknowledgement/26/01/EPI_ISL_632601.json</a> |
| Netherlands/ZH-EMC-769/2020 | EPI_ISL_632605 | Dutch COVID-19 response team | Erasmus Medical Center | Bas Oude Munnink et al | <a href="https://www.epicov.org/acknowledgement/26/05/EPI_ISL_632605.json">https://www.epicov.org/acknowledgement/26/05/EPI_ISL_632605.json</a> |
| Netherlands/ZH-EMC-771/2020 | EPI_ISL_632607 | Dutch COVID-19 response team | Erasmus Medical Center | Bas Oude Munnink et al | <a href="https://www.epicov.org/acknowledgement/26/07/EPI_ISL_632607.json">https://www.epicov.org/acknowledgement/26/07/EPI_ISL_632607.json</a> |
| Netherlands/ZH-EMC-774/2020 | EPI_ISL_632611 | Dutch COVID-19 response team | Erasmus Medical Center | Bas Oude Munnink et al | <a href="https://www.epicov.org/acknowledgement/26/11/EPI_ISL_632611.json">https://www.epicov.org/acknowledgement/26/11/EPI_ISL_632611.json</a> |
| Netherlands/ZH-EMC-775/2020 | EPI_ISL_632612 | Dutch COVID-19 response team | Erasmus Medical Center | Bas Oude Munnink et al | <a href="https://www.epicov.org/acknowledgement/26/12/EPI_ISL_632612.json">https://www.epicov.org/acknowledgement/26/12/EPI_ISL_632612.json</a> |
| Netherlands/ZH-EMC-777/2020 | EPI_ISL_632614 | Dutch COVID-19 response team | Erasmus Medical Center | Bas Oude Munnink et al | <a href="https://www.epicov.org/acknowledgement/26/14/EPI_ISL_632614.json">https://www.epicov.org/acknowledgement/26/14/EPI_ISL_632614.json</a> |
| Netherlands/ZH-EMC-778/2020 | EPI_ISL_632615 | Dutch COVID-19 response team | Erasmus Medical Center | Bas Oude Munnink et al | <a href="https://www.epicov.org/acknowledgement/26/15/EPI_ISL_632615.json">https://www.epicov.org/acknowledgement/26/15/EPI_ISL_632615.json</a> |
| Netherlands/ZH-EMC-779/2020 | EPI_ISL_632616 | Dutch COVID-19 response team | Erasmus Medical Center | Bas Oude Munnink et al | <a href="https://www.epicov.org/acknowledgement/26/16/EPI_ISL_632616.json">https://www.epicov.org/acknowledgement/26/16/EPI_ISL_632616.json</a> |

| seq_id                      | gisaid_epi_isl | originating_lab              | submitting_lab         | authors                | url                                                                                                                                             |
|-----------------------------|----------------|------------------------------|------------------------|------------------------|-------------------------------------------------------------------------------------------------------------------------------------------------|
| Netherlands/ZH-EMC-784/2020 | EPI_ISL_632621 | Dutch COVID-19 response team | Erasmus Medical Center | Bas Oude Munnink et al | <a href="https://www.epicov.org/acknowledgement/26/21/EPI_ISL_632621.json">https://www.epicov.org/acknowledgement/26/21/EPI_ISL_632621.json</a> |
| Netherlands/ZH-EMC-788/2020 | EPI_ISL_632657 | Dutch COVID-19 response team | Erasmus Medical Center | Bas Oude Munnink et al | <a href="https://www.epicov.org/acknowledgement/26/57/EPI_ISL_632657.json">https://www.epicov.org/acknowledgement/26/57/EPI_ISL_632657.json</a> |
| Netherlands/ZH-EMC-795/2020 | EPI_ISL_632441 | Dutch COVID-19 response team | Erasmus Medical Center | Bas Oude Munnink et al | <a href="https://www.epicov.org/acknowledgement/24/41/EPI_ISL_632441.json">https://www.epicov.org/acknowledgement/24/41/EPI_ISL_632441.json</a> |
| Netherlands/ZH-EMC-797/2020 | EPI_ISL_632676 | Dutch COVID-19 response team | Erasmus Medical Center | Bas Oude Munnink et al | <a href="https://www.epicov.org/acknowledgement/26/76/EPI_ISL_632676.json">https://www.epicov.org/acknowledgement/26/76/EPI_ISL_632676.json</a> |
| Netherlands/ZH-EMC-798/2020 | EPI_ISL_632677 | Dutch COVID-19 response team | Erasmus Medical Center | Bas Oude Munnink et al | <a href="https://www.epicov.org/acknowledgement/26/77/EPI_ISL_632677.json">https://www.epicov.org/acknowledgement/26/77/EPI_ISL_632677.json</a> |
| Netherlands/ZH-EMC-801/2020 | EPI_ISL_632680 | Dutch COVID-19 response team | Erasmus Medical Center | Bas Oude Munnink et al | <a href="https://www.epicov.org/acknowledgement/26/80/EPI_ISL_632680.json">https://www.epicov.org/acknowledgement/26/80/EPI_ISL_632680.json</a> |
| Netherlands/ZH-EMC-802/2020 | EPI_ISL_632681 | Dutch COVID-19 response team | Erasmus Medical Center | Bas Oude Munnink et al | <a href="https://www.epicov.org/acknowledgement/26/81/EPI_ISL_632681.json">https://www.epicov.org/acknowledgement/26/81/EPI_ISL_632681.json</a> |
| Netherlands/ZH-EMC-803/2020 | EPI_ISL_632682 | Dutch COVID-19 response team | Erasmus Medical Center | Bas Oude Munnink et al | <a href="https://www.epicov.org/acknowledgement/26/82/EPI_ISL_632682.json">https://www.epicov.org/acknowledgement/26/82/EPI_ISL_632682.json</a> |
| Netherlands/ZH-EMC-804/2020 | EPI_ISL_632683 | Dutch COVID-19 response team | Erasmus Medical Center | Bas Oude Munnink et al | <a href="https://www.epicov.org/acknowledgement/26/83/EPI_ISL_632683.json">https://www.epicov.org/acknowledgement/26/83/EPI_ISL_632683.json</a> |
| Netherlands/ZH-EMC-808/2020 | EPI_ISL_632687 | Dutch COVID-19 response team | Erasmus Medical Center | Bas Oude Munnink et al | <a href="https://www.epicov.org/acknowledgement/26/87/EPI_ISL_632687.json">https://www.epicov.org/acknowledgement/26/87/EPI_ISL_632687.json</a> |
| Netherlands/ZH-EMC-812/2020 | EPI_ISL_632689 | Dutch COVID-19 response team | Erasmus Medical Center | Bas Oude Munnink et al | <a href="https://www.epicov.org/acknowledgement/26/89/EPI_ISL_632689.json">https://www.epicov.org/acknowledgement/26/89/EPI_ISL_632689.json</a> |
| Netherlands/ZH-EMC-815/2020 | EPI_ISL_632692 | Dutch COVID-19 response team | Erasmus Medical Center | Bas Oude Munnink et al | <a href="https://www.epicov.org/acknowledgement/26/92/EPI_ISL_632692.json">https://www.epicov.org/acknowledgement/26/92/EPI_ISL_632692.json</a> |
| Netherlands/ZH-EMC-816/2020 | EPI_ISL_632383 | Dutch COVID-19 response team | Erasmus Medical Center | Bas Oude Munnink et al | <a href="https://www.epicov.org/acknowledgement/23/83/EPI_ISL_632383.json">https://www.epicov.org/acknowledgement/23/83/EPI_ISL_632383.json</a> |
| Netherlands/ZH-EMC-817/2020 | EPI_ISL_632693 | Dutch COVID-19 response team | Erasmus Medical Center | Bas Oude Munnink et al | <a href="https://www.epicov.org/acknowledgement/26/93/EPI_ISL_632693.json">https://www.epicov.org/acknowledgement/26/93/EPI_ISL_632693.json</a> |
| Netherlands/ZH-EMC-819/2020 | EPI_ISL_632330 | Dutch COVID-19 response team | Erasmus Medical Center | Bas Oude Munnink et al | <a href="https://www.epicov.org/acknowledgement/23/30/EPI_ISL_632330.json">https://www.epicov.org/acknowledgement/23/30/EPI_ISL_632330.json</a> |
| Netherlands/ZH-EMC-820/2020 | EPI_ISL_632695 | Dutch COVID-19 response team | Erasmus Medical Center | Bas Oude Munnink et al | <a href="https://www.epicov.org/acknowledgement/26/95/EPI_ISL_632695.json">https://www.epicov.org/acknowledgement/26/95/EPI_ISL_632695.json</a> |
| Netherlands/ZH-EMC-825/2020 | EPI_ISL_632416 | Dutch COVID-19 response team | Erasmus Medical Center | Bas Oude Munnink et al | <a href="https://www.epicov.org/acknowledgement/24/16/EPI_ISL_632416.json">https://www.epicov.org/acknowledgement/24/16/EPI_ISL_632416.json</a> |
| Netherlands/ZH-EMC-826/2020 | EPI_ISL_632698 | Dutch COVID-19 response team | Erasmus Medical Center | Bas Oude Munnink et al | <a href="https://www.epicov.org/acknowledgement/26/98/EPI_ISL_632698.json">https://www.epicov.org/acknowledgement/26/98/EPI_ISL_632698.json</a> |
| Netherlands/ZH-EMC-827/2020 | EPI_ISL_632699 | Dutch COVID-19 response team | Erasmus Medical Center | Bas Oude Munnink et al | <a href="https://www.epicov.org/acknowledgement/26/99/EPI_ISL_632699.json">https://www.epicov.org/acknowledgement/26/99/EPI_ISL_632699.json</a> |
| Netherlands/ZH-EMC-829/2020 | EPI_ISL_632397 | Dutch COVID-19 response team | Erasmus Medical Center | Bas Oude Munnink et al | <a href="https://www.epicov.org/acknowledgement/23/97/EPI_ISL_632397.json">https://www.epicov.org/acknowledgement/23/97/EPI_ISL_632397.json</a> |
| Netherlands/ZH-EMC-831/2020 | EPI_ISL_632701 | Dutch COVID-19 response team | Erasmus Medical Center | Bas Oude Munnink et al | <a href="https://www.epicov.org/acknowledgement/27/01/EPI_ISL_632701.json">https://www.epicov.org/acknowledgement/27/01/EPI_ISL_632701.json</a> |
| Netherlands/ZH-EMC-834/2020 | EPI_ISL_632704 | Dutch COVID-19 response team | Erasmus Medical Center | Bas Oude Munnink et al | <a href="https://www.epicov.org/acknowledgement/27/04/EPI_ISL_632704.json">https://www.epicov.org/acknowledgement/27/04/EPI_ISL_632704.json</a> |
| Netherlands/ZH-EMC-835/2020 | EPI_ISL_632412 | Dutch COVID-19 response team | Erasmus Medical Center | Bas Oude Munnink et al | <a href="https://www.epicov.org/acknowledgement/24/12/EPI_ISL_632412.json">https://www.epicov.org/acknowledgement/24/12/EPI_ISL_632412.json</a> |
| Netherlands/ZH-EMC-841/2020 | EPI_ISL_632706 | Dutch COVID-19 response team | Erasmus Medical Center | Bas Oude Munnink et al | <a href="https://www.epicov.org/acknowledgement/27/06/EPI_ISL_632706.json">https://www.epicov.org/acknowledgement/27/06/EPI_ISL_632706.json</a> |
| Netherlands/ZH-EMC-842/2020 | EPI_ISL_632423 | Dutch COVID-19 response team | Erasmus Medical Center | Bas Oude Munnink et al | <a href="https://www.epicov.org/acknowledgement/24/23/EPI_ISL_632423.json">https://www.epicov.org/acknowledgement/24/23/EPI_ISL_632423.json</a> |

| seq_id                      | gisaid_epi_isl | originating_lab              | submitting_lab         | authors                | url                                                                                                                                             |
|-----------------------------|----------------|------------------------------|------------------------|------------------------|-------------------------------------------------------------------------------------------------------------------------------------------------|
| Netherlands/ZH-EMC-843/2020 | EPI_ISL_632707 | Dutch COVID-19 response team | Erasmus Medical Center | Bas Oude Munnink et al | <a href="https://www.epicov.org/acknowledgement/27/07/EPI_ISL_632707.json">https://www.epicov.org/acknowledgement/27/07/EPI_ISL_632707.json</a> |
| Netherlands/ZH-EMC-846/2020 | EPI_ISL_632710 | Dutch COVID-19 response team | Erasmus Medical Center | Bas Oude Munnink et al | <a href="https://www.epicov.org/acknowledgement/27/10/EPI_ISL_632710.json">https://www.epicov.org/acknowledgement/27/10/EPI_ISL_632710.json</a> |
| Netherlands/ZH-EMC-848/2020 | EPI_ISL_632716 | Dutch COVID-19 response team | Erasmus Medical Center | Bas Oude Munnink et al | <a href="https://www.epicov.org/acknowledgement/27/16/EPI_ISL_632716.json">https://www.epicov.org/acknowledgement/27/16/EPI_ISL_632716.json</a> |
| Netherlands/ZH-EMC-851/2020 | EPI_ISL_632719 | Dutch COVID-19 response team | Erasmus Medical Center | Bas Oude Munnink et al | <a href="https://www.epicov.org/acknowledgement/27/19/EPI_ISL_632719.json">https://www.epicov.org/acknowledgement/27/19/EPI_ISL_632719.json</a> |
| Netherlands/ZH-EMC-854/2020 | EPI_ISL_632736 | Dutch COVID-19 response team | Erasmus Medical Center | Bas Oude Munnink et al | <a href="https://www.epicov.org/acknowledgement/27/36/EPI_ISL_632736.json">https://www.epicov.org/acknowledgement/27/36/EPI_ISL_632736.json</a> |
| Netherlands/ZH-EMC-856/2020 | EPI_ISL_632336 | Dutch COVID-19 response team | Erasmus Medical Center | Bas Oude Munnink et al | <a href="https://www.epicov.org/acknowledgement/23/36/EPI_ISL_632336.json">https://www.epicov.org/acknowledgement/23/36/EPI_ISL_632336.json</a> |
| Netherlands/ZH-EMC-857/2020 | EPI_ISL_632738 | Dutch COVID-19 response team | Erasmus Medical Center | Bas Oude Munnink et al | <a href="https://www.epicov.org/acknowledgement/27/38/EPI_ISL_632738.json">https://www.epicov.org/acknowledgement/27/38/EPI_ISL_632738.json</a> |
| Netherlands/ZH-EMC-858/2020 | EPI_ISL_632339 | Dutch COVID-19 response team | Erasmus Medical Center | Bas Oude Munnink et al | <a href="https://www.epicov.org/acknowledgement/23/39/EPI_ISL_632339.json">https://www.epicov.org/acknowledgement/23/39/EPI_ISL_632339.json</a> |
| Netherlands/ZH-EMC-862/2020 | EPI_ISL_632747 | Dutch COVID-19 response team | Erasmus Medical Center | Bas Oude Munnink et al | <a href="https://www.epicov.org/acknowledgement/27/47/EPI_ISL_632747.json">https://www.epicov.org/acknowledgement/27/47/EPI_ISL_632747.json</a> |
| Netherlands/ZH-EMC-864/2020 | EPI_ISL_632749 | Dutch COVID-19 response team | Erasmus Medical Center | Bas Oude Munnink et al | <a href="https://www.epicov.org/acknowledgement/27/49/EPI_ISL_632749.json">https://www.epicov.org/acknowledgement/27/49/EPI_ISL_632749.json</a> |
| Netherlands/ZH-EMC-866/2020 | EPI_ISL_632448 | Dutch COVID-19 response team | Erasmus Medical Center | Bas Oude Munnink et al | <a href="https://www.epicov.org/acknowledgement/24/48/EPI_ISL_632448.json">https://www.epicov.org/acknowledgement/24/48/EPI_ISL_632448.json</a> |
| Netherlands/ZH-EMC-870/2020 | EPI_ISL_632753 | Dutch COVID-19 response team | Erasmus Medical Center | Bas Oude Munnink et al | <a href="https://www.epicov.org/acknowledgement/27/53/EPI_ISL_632753.json">https://www.epicov.org/acknowledgement/27/53/EPI_ISL_632753.json</a> |
| Netherlands/ZH-EMC-876/2020 | EPI_ISL_632756 | Dutch COVID-19 response team | Erasmus Medical Center | Bas Oude Munnink et al | <a href="https://www.epicov.org/acknowledgement/27/56/EPI_ISL_632756.json">https://www.epicov.org/acknowledgement/27/56/EPI_ISL_632756.json</a> |
| Netherlands/ZH-EMC-877/2020 | EPI_ISL_632757 | Dutch COVID-19 response team | Erasmus Medical Center | Bas Oude Munnink et al | <a href="https://www.epicov.org/acknowledgement/27/57/EPI_ISL_632757.json">https://www.epicov.org/acknowledgement/27/57/EPI_ISL_632757.json</a> |
| Netherlands/ZH-EMC-881/2020 | EPI_ISL_632374 | Dutch COVID-19 response team | Erasmus Medical Center | Bas Oude Munnink et al | <a href="https://www.epicov.org/acknowledgement/23/74/EPI_ISL_632374.json">https://www.epicov.org/acknowledgement/23/74/EPI_ISL_632374.json</a> |
| Netherlands/ZH-EMC-886/2020 | EPI_ISL_632766 | Dutch COVID-19 response team | Erasmus Medical Center | Bas Oude Munnink et al | <a href="https://www.epicov.org/acknowledgement/27/66/EPI_ISL_632766.json">https://www.epicov.org/acknowledgement/27/66/EPI_ISL_632766.json</a> |
| Netherlands/ZH-EMC-887/2020 | EPI_ISL_632398 | Dutch COVID-19 response team | Erasmus Medical Center | Bas Oude Munnink et al | <a href="https://www.epicov.org/acknowledgement/23/98/EPI_ISL_632398.json">https://www.epicov.org/acknowledgement/23/98/EPI_ISL_632398.json</a> |
| Netherlands/ZH-EMC-889/2020 | EPI_ISL_632449 | Dutch COVID-19 response team | Erasmus Medical Center | Bas Oude Munnink et al | <a href="https://www.epicov.org/acknowledgement/24/49/EPI_ISL_632449.json">https://www.epicov.org/acknowledgement/24/49/EPI_ISL_632449.json</a> |
| Netherlands/ZH-EMC-891/2020 | EPI_ISL_632769 | Dutch COVID-19 response team | Erasmus Medical Center | Bas Oude Munnink et al | <a href="https://www.epicov.org/acknowledgement/27/69/EPI_ISL_632769.json">https://www.epicov.org/acknowledgement/27/69/EPI_ISL_632769.json</a> |
| Netherlands/ZH-EMC-892/2020 | EPI_ISL_632770 | Dutch COVID-19 response team | Erasmus Medical Center | Bas Oude Munnink et al | <a href="https://www.epicov.org/acknowledgement/27/70/EPI_ISL_632770.json">https://www.epicov.org/acknowledgement/27/70/EPI_ISL_632770.json</a> |
| Netherlands/ZH-EMC-895/2020 | EPI_ISL_632785 | Dutch COVID-19 response team | Erasmus Medical Center | Bas Oude Munnink et al | <a href="https://www.epicov.org/acknowledgement/27/85/EPI_ISL_632785.json">https://www.epicov.org/acknowledgement/27/85/EPI_ISL_632785.json</a> |
| Netherlands/ZH-EMC-896/2020 | EPI_ISL_632786 | Dutch COVID-19 response team | Erasmus Medical Center | Bas Oude Munnink et al | <a href="https://www.epicov.org/acknowledgement/27/86/EPI_ISL_632786.json">https://www.epicov.org/acknowledgement/27/86/EPI_ISL_632786.json</a> |
| Netherlands/ZH-EMC-898/2020 | EPI_ISL_632788 | Dutch COVID-19 response team | Erasmus Medical Center | Bas Oude Munnink et al | <a href="https://www.epicov.org/acknowledgement/27/88/EPI_ISL_632788.json">https://www.epicov.org/acknowledgement/27/88/EPI_ISL_632788.json</a> |
| Netherlands/ZH-EMC-900/2020 | EPI_ISL_632790 | Dutch COVID-19 response team | Erasmus Medical Center | Bas Oude Munnink et al | <a href="https://www.epicov.org/acknowledgement/27/90/EPI_ISL_632790.json">https://www.epicov.org/acknowledgement/27/90/EPI_ISL_632790.json</a> |
| Netherlands/ZH-EMC-902/2020 | EPI_ISL_632792 | Dutch COVID-19 response team | Erasmus Medical Center | Bas Oude Munnink et al | <a href="https://www.epicov.org/acknowledgement/27/92/EPI_ISL_632792.json">https://www.epicov.org/acknowledgement/27/92/EPI_ISL_632792.json</a> |



| seq_id                         | gisaid_epi_isl | originating_lab              | submitting_lab                                                  | authors                | url                                                                                                                                             |
|--------------------------------|----------------|------------------------------|-----------------------------------------------------------------|------------------------|-------------------------------------------------------------------------------------------------------------------------------------------------|
| Netherlands/ZH-EMC-921/2020    | EPI_ISL_722501 | Dutch COVID-19 response team | Erasmus Medical Center                                          | Bas Oude Munnink et al | <a href="https://www.epicov.org/acknowledgement/25/01/EPI_ISL_722501.json">https://www.epicov.org/acknowledgement/25/01/EPI_ISL_722501.json</a> |
| Netherlands/ZH-EMC-923/2020    | EPI_ISL_722519 | Dutch COVID-19 response team | Erasmus Medical Center                                          | Bas Oude Munnink et al | <a href="https://www.epicov.org/acknowledgement/25/19/EPI_ISL_722519.json">https://www.epicov.org/acknowledgement/25/19/EPI_ISL_722519.json</a> |
| Netherlands/ZH-EMC-924/2020    | EPI_ISL_722318 | Dutch COVID-19 response team | Erasmus Medical Center                                          | Bas Oude Munnink et al | <a href="https://www.epicov.org/acknowledgement/23/18/EPI_ISL_722318.json">https://www.epicov.org/acknowledgement/23/18/EPI_ISL_722318.json</a> |
| Netherlands/ZH-EMC-928/2020    | EPI_ISL_722324 | Dutch COVID-19 response team | Erasmus Medical Center                                          | Bas Oude Munnink et al | <a href="https://www.epicov.org/acknowledgement/23/24/EPI_ISL_722324.json">https://www.epicov.org/acknowledgement/23/24/EPI_ISL_722324.json</a> |
| Netherlands/ZH-EMC-929/2020    | EPI_ISL_722517 | Dutch COVID-19 response team | Erasmus Medical Center                                          | Bas Oude Munnink et al | <a href="https://www.epicov.org/acknowledgement/25/17/EPI_ISL_722517.json">https://www.epicov.org/acknowledgement/25/17/EPI_ISL_722517.json</a> |
| Netherlands/ZH-EMC-930/2020    | EPI_ISL_722441 | Dutch COVID-19 response team | Erasmus Medical Center                                          | Bas Oude Munnink et al | <a href="https://www.epicov.org/acknowledgement/24/41/EPI_ISL_722441.json">https://www.epicov.org/acknowledgement/24/41/EPI_ISL_722441.json</a> |
| Netherlands/ZH-EMC-933/2020    | EPI_ISL_722521 | Dutch COVID-19 response team | Erasmus Medical Center                                          | Bas Oude Munnink et al | <a href="https://www.epicov.org/acknowledgement/25/21/EPI_ISL_722521.json">https://www.epicov.org/acknowledgement/25/21/EPI_ISL_722521.json</a> |
| Netherlands/ZH-EMC-941/2020    | EPI_ISL_722596 | Dutch COVID-19 response team | Erasmus Medical Center                                          | Bas Oude Munnink et al | <a href="https://www.epicov.org/acknowledgement/25/96/EPI_ISL_722596.json">https://www.epicov.org/acknowledgement/25/96/EPI_ISL_722596.json</a> |
| Netherlands/ZH-EMC-944/2020    | EPI_ISL_722308 | Dutch COVID-19 response team | Erasmus Medical Center                                          | Bas Oude Munnink et al | <a href="https://www.epicov.org/acknowledgement/23/08/EPI_ISL_722308.json">https://www.epicov.org/acknowledgement/23/08/EPI_ISL_722308.json</a> |
| Netherlands/ZH-EMC-945/2020    | EPI_ISL_722513 | Dutch COVID-19 response team | Erasmus Medical Center                                          | Bas Oude Munnink et al | <a href="https://www.epicov.org/acknowledgement/25/13/EPI_ISL_722513.json">https://www.epicov.org/acknowledgement/25/13/EPI_ISL_722513.json</a> |
| Netherlands/ZH-EMC-947/2020    | EPI_ISL_722360 | Dutch COVID-19 response team | Erasmus Medical Center                                          | Bas Oude Munnink et al | <a href="https://www.epicov.org/acknowledgement/23/60/EPI_ISL_722360.json">https://www.epicov.org/acknowledgement/23/60/EPI_ISL_722360.json</a> |
| Netherlands/ZH-EMC-948/2020    | EPI_ISL_722382 | Dutch COVID-19 response team | Erasmus Medical Center                                          | Bas Oude Munnink et al | <a href="https://www.epicov.org/acknowledgement/23/82/EPI_ISL_722382.json">https://www.epicov.org/acknowledgement/23/82/EPI_ISL_722382.json</a> |
| Netherlands/ZH-EMC-960/2020    | EPI_ISL_722828 | Dutch COVID-19 response team | Erasmus Medical Center                                          | Bas Oude Munnink et al | <a href="https://www.epicov.org/acknowledgement/28/28/EPI_ISL_722828.json">https://www.epicov.org/acknowledgement/28/28/EPI_ISL_722828.json</a> |
| Netherlands/ZH-EMC-962/2020    | EPI_ISL_722423 | Dutch COVID-19 response team | Erasmus Medical Center                                          | Bas Oude Munnink et al | <a href="https://www.epicov.org/acknowledgement/24/23/EPI_ISL_722423.json">https://www.epicov.org/acknowledgement/24/23/EPI_ISL_722423.json</a> |
| Netherlands/ZH-EMC-979/2020    | EPI_ISL_722516 | Dutch COVID-19 response team | Erasmus Medical Center                                          | Bas Oude Munnink et al | <a href="https://www.epicov.org/acknowledgement/25/16/EPI_ISL_722516.json">https://www.epicov.org/acknowledgement/25/16/EPI_ISL_722516.json</a> |
| Netherlands/ZH-RIVM-20449/2020 | EPI_ISL_728668 | Dutch COVID-19 response team | National Institute for Public Health and the Environment (RIVM) | Adam Meijer et al      | <a href="https://www.epicov.org/acknowledgement/86/68/EPI_ISL_728668.json">https://www.epicov.org/acknowledgement/86/68/EPI_ISL_728668.json</a> |
| Netherlands/ZH-RIVM-20452/2020 | EPI_ISL_728671 | Dutch COVID-19 response team | National Institute for Public Health and the Environment (RIVM) | Adam Meijer et al      | <a href="https://www.epicov.org/acknowledgement/86/71/EPI_ISL_728671.json">https://www.epicov.org/acknowledgement/86/71/EPI_ISL_728671.json</a> |
| Netherlands/ZH-RIVM-20489/2020 | EPI_ISL_728704 | Dutch COVID-19 response team | National Institute for Public Health and the Environment (RIVM) | Adam Meijer et al      | <a href="https://www.epicov.org/acknowledgement/87/04/EPI_ISL_728704.json">https://www.epicov.org/acknowledgement/87/04/EPI_ISL_728704.json</a> |
| Netherlands/ZH-RIVM-20491/2020 | EPI_ISL_728706 | Dutch COVID-19 response team | National Institute for Public Health and the Environment (RIVM) | Adam Meijer et al      | <a href="https://www.epicov.org/acknowledgement/87/06/EPI_ISL_728706.json">https://www.epicov.org/acknowledgement/87/06/EPI_ISL_728706.json</a> |
| Netherlands/ZH-RIVM-20889/2020 | EPI_ISL_790927 | Dutch COVID-19 response team | National Institute for Public Health and the Environment (RIVM) | Adam Meijer et al      | <a href="https://www.epicov.org/acknowledgement/09/27/EPI_ISL_790927.json">https://www.epicov.org/acknowledgement/09/27/EPI_ISL_790927.json</a> |
| Netherlands/ZH-RIVM-20891/2020 | EPI_ISL_790929 | Dutch COVID-19 response team | National Institute for Public Health and the Environment (RIVM) | Adam Meijer et al      | <a href="https://www.epicov.org/acknowledgement/09/29/EPI_ISL_790929.json">https://www.epicov.org/acknowledgement/09/29/EPI_ISL_790929.json</a> |
| Netherlands/ZH-RIVM-20934/2020 | EPI_ISL_790960 | Dutch COVID-19 response team | National Institute for Public Health and the Environment (RIVM) | Adam Meijer et al      | <a href="https://www.epicov.org/acknowledgement/09/60/EPI_ISL_790960.json">https://www.epicov.org/acknowledgement/09/60/EPI_ISL_790960.json</a> |
| Netherlands/ZH-RIVM-21236/2020 | EPI_ISL_824158 | Dutch COVID-19 response team | National Institute for Public Health and the Environment (RIVM) | Adam Meijer et al      | <a href="https://www.epicov.org/acknowledgement/41/58/EPI_ISL_824158.json">https://www.epicov.org/acknowledgement/41/58/EPI_ISL_824158.json</a> |
| Netherlands/ZH-RIVM-21237/2020 | EPI_ISL_824159 | Dutch COVID-19 response team | National Institute for Public Health and the Environment (RIVM) | Adam Meijer et al      | <a href="https://www.epicov.org/acknowledgement/41/59/EPI_ISL_824159.json">https://www.epicov.org/acknowledgement/41/59/EPI_ISL_824159.json</a> |
| Netherlands/ZH-RIVM-21285/2020 | EPI_ISL_824003 | Dutch COVID-19 response team | National Institute for Public Health and the Environment (RIVM) | Adam Meijer et al      | <a href="https://www.epicov.org/acknowledgement/40/03/EPI_ISL_824003.json">https://www.epicov.org/acknowledgement/40/03/EPI_ISL_824003.json</a> |

| seq_id                           | gisaid_epi_isl  | originating_lab              | submitting_lab                                                  | authors                | url                                                                                                                                               |
|----------------------------------|-----------------|------------------------------|-----------------------------------------------------------------|------------------------|---------------------------------------------------------------------------------------------------------------------------------------------------|
| Netherlands/ZH-RIVM-21287/2020   | EPI_ISL_824206  | Dutch COVID-19 response team | National Institute for Public Health and the Environment (RIVM) | Adam Meijer et al      | <a href="https://www.epicov.org/acknowledgement/42/06/EPI_ISL_824206.json">https://www.epicov.org/acknowledgement/42/06/EPI_ISL_824206.json</a>   |
| Netherlands/ZH-RIVM-21758/2020   | EPI_ISL_1089820 | Dutch COVID-19 response team | National Institute for Public Health and the Environment (RIVM) | Adam Meijer et al      | <a href="https://www.epicov.org/acknowledgement/98/20/EPI_ISL_1089820.json">https://www.epicov.org/acknowledgement/98/20/EPI_ISL_1089820.json</a> |
| Netherlands/ZH-RIVM-21783/2020   | EPI_ISL_1498170 | Dutch COVID-19 response team | National Institute for Public Health and the Environment (RIVM) | Adam Meijer et al      | <a href="https://www.epicov.org/acknowledgement/81/70/EPI_ISL_1498170.json">https://www.epicov.org/acknowledgement/81/70/EPI_ISL_1498170.json</a> |
| Netherlands/ZuidHolland_134/2020 | EPI_ISL_461307  | Dutch COVID-19 response team | Erasmus Medical Center                                          | Bas Oude Munnink et al | <a href="https://www.epicov.org/acknowledgement/13/07/EPI_ISL_461307.json">https://www.epicov.org/acknowledgement/13/07/EPI_ISL_461307.json</a>   |
| Netherlands/ZuidHolland_135/2020 | EPI_ISL_461308  | Dutch COVID-19 response team | Erasmus Medical Center                                          | Bas Oude Munnink et al | <a href="https://www.epicov.org/acknowledgement/13/08/EPI_ISL_461308.json">https://www.epicov.org/acknowledgement/13/08/EPI_ISL_461308.json</a>   |
| Netherlands/ZuidHolland_137/2020 | EPI_ISL_461310  | Dutch COVID-19 response team | Erasmus Medical Center                                          | Bas Oude Munnink et al | <a href="https://www.epicov.org/acknowledgement/13/10/EPI_ISL_461310.json">https://www.epicov.org/acknowledgement/13/10/EPI_ISL_461310.json</a>   |
| Netherlands/ZuidHolland_142/2020 | EPI_ISL_461315  | Dutch COVID-19 response team | Erasmus Medical Center                                          | Bas Oude Munnink et al | <a href="https://www.epicov.org/acknowledgement/13/15/EPI_ISL_461315.json">https://www.epicov.org/acknowledgement/13/15/EPI_ISL_461315.json</a>   |
| Netherlands/ZuidHolland_164/2020 | EPI_ISL_461336  | Dutch COVID-19 response team | Erasmus Medical Center                                          | Bas Oude Munnink et al | <a href="https://www.epicov.org/acknowledgement/13/36/EPI_ISL_461336.json">https://www.epicov.org/acknowledgement/13/36/EPI_ISL_461336.json</a>   |
| Netherlands/ZuidHolland_194/2020 | EPI_ISL_461366  | Dutch COVID-19 response team | Erasmus Medical Center                                          | Bas Oude Munnink et al | <a href="https://www.epicov.org/acknowledgement/13/66/EPI_ISL_461366.json">https://www.epicov.org/acknowledgement/13/66/EPI_ISL_461366.json</a>   |
| Netherlands/ZuidHolland_196/2020 | EPI_ISL_461368  | Dutch COVID-19 response team | Erasmus Medical Center                                          | Bas Oude Munnink et al | <a href="https://www.epicov.org/acknowledgement/13/68/EPI_ISL_461368.json">https://www.epicov.org/acknowledgement/13/68/EPI_ISL_461368.json</a>   |
| Netherlands/ZuidHolland_214/2020 | EPI_ISL_461386  | Dutch COVID-19 response team | Erasmus Medical Center                                          | Bas Oude Munnink et al | <a href="https://www.epicov.org/acknowledgement/13/86/EPI_ISL_461386.json">https://www.epicov.org/acknowledgement/13/86/EPI_ISL_461386.json</a>   |
| Netherlands/ZuidHolland_215/2020 | EPI_ISL_461387  | Dutch COVID-19 response team | Erasmus Medical Center                                          | Bas Oude Munnink et al | <a href="https://www.epicov.org/acknowledgement/13/87/EPI_ISL_461387.json">https://www.epicov.org/acknowledgement/13/87/EPI_ISL_461387.json</a>   |
| Netherlands/ZuidHolland_216/2020 | EPI_ISL_461388  | Dutch COVID-19 response team | Erasmus Medical Center                                          | Bas Oude Munnink et al | <a href="https://www.epicov.org/acknowledgement/13/88/EPI_ISL_461388.json">https://www.epicov.org/acknowledgement/13/88/EPI_ISL_461388.json</a>   |
| Netherlands/ZuidHolland_222/2020 | EPI_ISL_461394  | Dutch COVID-19 response team | Erasmus Medical Center                                          | Bas Oude Munnink et al | <a href="https://www.epicov.org/acknowledgement/13/94/EPI_ISL_461394.json">https://www.epicov.org/acknowledgement/13/94/EPI_ISL_461394.json</a>   |
| Netherlands/ZuidHolland_224/2020 | EPI_ISL_461396  | Dutch COVID-19 response team | Erasmus Medical Center                                          | Bas Oude Munnink et al | <a href="https://www.epicov.org/acknowledgement/13/96/EPI_ISL_461396.json">https://www.epicov.org/acknowledgement/13/96/EPI_ISL_461396.json</a>   |
| Netherlands/ZuidHolland_226/2020 | EPI_ISL_461398  | Dutch COVID-19 response team | Erasmus Medical Center                                          | Bas Oude Munnink et al | <a href="https://www.epicov.org/acknowledgement/13/98/EPI_ISL_461398.json">https://www.epicov.org/acknowledgement/13/98/EPI_ISL_461398.json</a>   |
| SintEustatius/BQ-RIVM-10370/2020 | EPI_ISL_636600  | Dutch COVID-19 response team | National Institute for Public Health and the Environment (RIVM) | Adam Meijer et al      | <a href="https://www.epicov.org/acknowledgement/66/00/EPI_ISL_636600.json">https://www.epicov.org/acknowledgement/66/00/EPI_ISL_636600.json</a>   |
| SintEustatius/BQ-RIVM-10371/2020 | EPI_ISL_636601  | Dutch COVID-19 response team | National Institute for Public Health and the Environment (RIVM) | Adam Meijer et al      | <a href="https://www.epicov.org/acknowledgement/66/01/EPI_ISL_636601.json">https://www.epicov.org/acknowledgement/66/01/EPI_ISL_636601.json</a>   |
